# Supplementary material for: Enteric bacterial infection in Drosophila induces whole-body alterations in metabolic gene expression independently of the immune deficiency signaling pathway
Source: G3 (Bethesda). 2022 Jul 4;12(11):jkac163. doi: 10.1093/g3journal/jkac163 (PMC9635644; doi:10.1093/g3journal/jkac163)
Supplement: jkac163_Supplemental_Table_1 [file jkac163_supplemental_table_1.xlsx]

## Sheet: gene expression changes
target_id	pval	qval	log(e) fold change: infection/control	se_b	mean_obs	var_obs	tech_var	sigma_sq	smooth_sigma_sq	final_sigma_sq
Sodh-1	1.86e-300	2.15e-296	3.51303	0.094821	6.94259	3.39036	0.00306263	0.0239104	0.0133145	0.0239104
Lsp2	1.61e-280	9.28e-277	9.47572	0.264762	5.95132	24.6792	0.181689	0.028608	0.0231677	0.028608
CG34166	1.16e-167	4.46e-164	5.80793	0.210443	7.06799	9.32042	0.0104693	0.122389	0.0126292	0.122389
pug	4.59e-157	1.33e-153	1.85175	0.0693515	8.07585	0.948291	0.000470139	0.0139587	0.0102746	0.0139587
CG1544	1.41e-131	3.25e-128	2.40271	0.0984393	5.85602	1.58917	0.0049047	0.011288	0.0241662	0.0241662
CG10621	9.76e-125	1.88e-121	3.33582	0.140426	6.6589	3.08861	0.00413326	0.0550253	0.0157461	0.0550253
Gnmt	2.15e-124	3.55e-121	4.74858	0.200178	4.39021	6.20524	0.0790244	-0.0179517	0.0411891	0.0411891
CG15096	2.88e-124	4.16e-121	1.87448	0.0790603	7.10868	0.97532	0.0013321	0.0174195	0.012435	0.0174195
hgo	7e-112	8.99e-109	2.58556	0.115032	5.37283	1.85851	0.0100658	0.0287537	0.0296316	0.0296316
CG10361	2.03e-110	2.34e-107	3.42178	0.153258	5.06753	3.2573	0.0201076	0.0503568	0.0332821	0.0503568
Hpd	1.78e-108	1.87e-105	3.18838	0.144101	6.72393	2.82912	0.00320885	0.0590865	0.0150931	0.0590865
Prx2540-2	8.84e-104	8.51e-101	1.58929	0.073467	6.78091	0.697738	0.00163025	0.0081258	0.014562	0.014562
Prx2540-1	2.64e-101	2.35e-98	1.67212	0.0782527	6.74144	0.777666	0.00344503	0.0131964	0.0149254	0.0149254
Sardh	4.06e-95	3.35e-92	3.30982	0.159954	4.55595	3.05749	0.0285267	0.0482292	0.0392311	0.0482292
CG10962	3.04e-86	2.34e-83	2.8961	0.14714	6.7146	2.34651	0.00322263	0.0617279	0.015184	0.0617279
CG3699	1.67e-84	1.21e-81	2.60343	0.133657	7.13126	1.89722	0.0015642	0.0520283	0.0123318	0.0520283
PGRP-SD	2.06e-82	1.4e-79	2.91566	0.151618	5.85577	2.38117	0.00714317	0.0618208	0.0241688	0.0618208
CG9837	2.83e-78	1.82e-75	2.01795	0.10774	5.79303	1.13937	0.00998097	0.0216895	0.0248428	0.0248428
CG3597	5.34e-78	3.25e-75	2.79527	0.149512	6.29438	2.19194	0.00413887	0.0629227	0.019784	0.0629227
CG3999	5.66e-76	3.27e-73	4.33515	0.235024	5.35553	5.27616	0.0255745	0.140135	0.0298364	0.140135
CG11425	9.27e-74	5.1e-71	3.35047	0.184417	5.27892	3.1543	0.0164945	0.0855346	0.0307479	0.0855346
Argl	5.28e-73	2.77e-70	1.37051	0.0758351	6.66517	0.525651	0.00157156	0.0131559	0.0156813	0.0156813
Paics	1.87e-67	9.41e-65	1.16658	0.0672265	9.12336	0.383484	0.000150448	0.0134078	0.0111493	0.0134078
CG17325	2.31e-67	1.07e-64	-1.68549	0.0971968	6.73795	0.800551	0.0010537	0.0272879	0.0149586	0.0272879
CG42305	2.31e-67	1.07e-64	-1.68549	0.0971968	6.73795	0.800551	0.0010537	0.0272879	0.0149586	0.0272879
CG1461	3.31e-65	1.47e-62	1.72237	0.101	6.25086	0.836885	0.00419084	0.0264119	0.0202309	0.0264119
CG17636	2.06e-63	8.59e-61	-2.15472	0.12818	4.95089	1.31104	0.0120207	0.03727	0.0346762	0.03727
CG8249	2.08e-63	8.59e-61	2.24621	0.133628	5.24589	1.42473	0.00976401	0.0438049	0.0311426	0.0438049
Aldh7A1	1.58e-60	6.29e-58	1.13137	0.0689368	6.99084	0.357559	0.00122826	0.00808764	0.0130286	0.0130286
Nepl21	1.97e-60	7.59e-58	1.85643	0.11321	5.84746	0.974867	0.00378578	0.0346634	0.0242574	0.0346634
CG5955	1.17e-59	4.36e-57	1.87801	0.115289	5.20403	0.98262	0.0082304	0.0145782	0.0316439	0.0316439
CG16965	4.31e-59	1.56e-56	2.62035	0.161654	4.51305	1.94388	0.0230456	0.0553503	0.0397292	0.0553503
CG9993	9.79e-59	3.43e-56	-2.07431	0.128368	4.85111	1.21262	0.0135892	0.0294537	0.0358456	0.0358456
CG13795	3.8e-57	1.29e-54	1.78854	0.112261	5.41378	0.906791	0.00677969	0.0310277	0.0291484	0.0310277
PGRP-SB1	4.49e-57	1.48e-54	3.7286	0.234186	6.54815	3.94116	0.00492274	0.159607	0.0169452	0.159607
Tep2	3.66e-54	1.18e-51	1.61284	0.104077	6.79742	0.738978	0.00157926	0.0309171	0.0144162	0.0309171
GstE9	1.66e-53	5.18e-51	1.65183	0.107268	6.54127	0.775528	0.00188898	0.0326302	0.0170223	0.0326302
CG12896	4.3e-53	1.31e-50	1.63398	0.106536	6.04026	0.749603	0.0117845	0.0118109	0.022265	0.022265
Lsp1beta	1.52e-52	4.5e-50	4.67272	0.306302	4.18913	6.2107	0.0865134	0.194949	0.0437623	0.194949
ssp7	2.27e-51	6.57e-49	2.39296	0.158709	6.58553	1.6304	0.00242613	0.0731395	0.016531	0.0731395
CCHa2	2.94e-51	8.28e-49	2.68491	0.178273	6.06962	2.0527	0.00571292	0.0896311	0.0219736	0.0896311
Galk	6.05e-50	1.67e-47	0.889303	0.059848	8.04678	0.224927	0.000448679	0.00971239	0.0102967	0.0102967
CG11089	7.18e-49	1.93e-46	1.07203	0.0729638	8.77553	0.327952	0.000183262	0.0157879	0.0105246	0.0157879
CG10184	2.08e-48	5.47e-46	1.02006	0.0697694	6.92503	0.296629	0.00117421	0.0129611	0.0134291	0.0134291
fbp	7.02e-48	1.8e-45	1.1783	0.0810531	7.64512	0.39657	0.000612677	0.0190961	0.0107073	0.0190961
CG10516	1.17e-47	2.95e-45	1.01648	0.0700913	6.90176	0.289585	0.00114909	0.00742544	0.0135893	0.0135893
CG11594	1e-45	2.47e-43	1.58797	0.111879	6.78441	0.721859	0.00170459	0.0358459	0.0145308	0.0358459
Yp3	1.58e-44	3.8e-42	2.42799	0.173438	11.9142	1.6898	1.42e-05	0.0902279	0.0417427	0.0902279
CG3829	6.35e-44	1.5e-41	1.73385	0.124739	6.49295	0.862318	0.00288564	0.0437939	0.0175683	0.0437939
CG14687	6.61e-44	1.53e-41	-1.20891	0.0869905	6.49245	0.419216	0.0017541	0.0209479	0.017574	0.0209479
CG33511	1.68e-43	3.82e-41	1.93888	0.140195	4.3575	1.05078	0.0173746	0.0107095	0.0415894	0.0415894
Jon65Aii	4.99e-43	1.09e-40	-3.32753	0.241976	4.3339	3.17945	0.0496546	0.126003	0.0418819	0.126003
CG7560	4.9e-43	1.09e-40	2.2458	0.163298	5.07843	1.44826	0.0121265	0.0678724	0.0331513	0.0678724
fit	3.46e-42	7.4e-40	3.4038	0.250081	7.26912	3.33034	0.00208974	0.185532	0.0117671	0.185532
Mtk	3.99e-41	8.39e-39	4.31349	0.321163	5.82351	5.35572	0.014114	0.295323	0.0245138	0.295323
Eglp4	5.16e-41	1.07e-38	1.56738	0.116866	7.43468	0.707253	0.000840129	0.0401331	0.0112186	0.0401331
CG11236	6.41e-41	1.3e-38	2.32165	0.173313	5.41475	1.55193	0.00890972	0.0812026	0.029137	0.0812026
AcCoAS	9.16e-41	1.83e-38	0.843921	0.0631246	8.82097	0.205104	0.000170151	0.011784	0.0105861	0.011784
CG10814	1.19e-40	2.34e-38	6.77024	0.507159	4.35157	13.2023	0.138051	0.63358	0.0416626	0.63358
CG9331	1.89e-40	3.65e-38	1.2503	0.093902	7.94312	0.450391	0.000506858	0.0259459	0.0103782	0.0259459
CG31313	2.54e-40	4.81e-38	1.24319	0.0935211	7.02037	0.44536	0.0016312	0.0246074	0.0128707	0.0246074
arg	5.21e-40	9.72e-38	2.44268	0.184504	5.21207	1.72012	0.0103908	0.0917339	0.0315476	0.0917339
CG2145	1.86e-39	3.42e-37	1.28132	0.0974901	6.67438	0.473682	0.00182134	0.0266916	0.0155867	0.0266916
fat-spondin	2.11e-39	3.81e-37	1.55991	0.118771	6.43969	0.702108	0.00221521	0.0401045	0.0181749	0.0401045
DptA	2.23e-39	3.97e-37	4.90949	0.373927	5.29995	6.95491	0.0336939	0.38577	0.030497	0.38577
Nepl13	2.82e-39	4.95e-37	2.33802	0.178316	4.5436	1.57754	0.0226687	0.0727215	0.039374	0.0727215
CG42807	3.31e-39	5.71e-37	2.11395	0.161374	6.57908	1.28978	0.00371839	0.0744067	0.0166019	0.0744067
Ndg	3.71e-39	6.3e-37	1.26491	0.0966243	5.82489	0.456181	0.0035098	0.0182892	0.024499	0.024499
CG6415	4.11e-39	6.88e-37	2.4348	0.1861	5.74801	1.71124	0.00624292	0.0976571	0.025334	0.0976571
SPE	6.35e-39	1.05e-36	1.1531	0.0883602	6.83488	0.383925	0.00112268	0.0222999	0.0140999	0.0222999
CG32444	1.48e-38	2.4e-36	1.75166	0.134892	6.97008	0.886438	0.00123679	0.0533508	0.0131463	0.0533508
Glt	2.31e-38	3.72e-36	1.95795	0.15118	7.32997	1.10786	0.000961165	0.0676047	0.0115504	0.0676047
Nepl10	2.29e-37	3.62e-35	1.87991	0.147166	4.29544	0.97503	0.0226073	-0.0102952	0.0423662	0.0423662
apolpp	3.89e-37	6.08e-35	2.43747	0.191434	9.29694	1.72029	0.000200134	0.10974	0.0116017	0.10974
CG9512	1.25e-36	1.92e-34	1.32346	0.104691	8.17093	0.507583	0.000320879	0.0325597	0.0102241	0.0325597
CG13091	2.6e-36	3.95e-34	-1.48529	0.118033	5.02764	0.627107	0.00803537	0.0199565	0.0337601	0.0337601
Nepl11	2.81e-36	4.22e-34	1.47768	0.117487	6.37773	0.633159	0.00186195	0.0395478	0.0188756	0.0395478
Tig	4.57e-36	6.77e-34	1.04781	0.0835647	6.36614	0.308883	0.00194433	0.0084526	0.0190048	0.0190048
Rh4	4.67e-36	6.84e-34	-0.789301	0.0629569	7.42602	0.176116	0.000646501	0.00618192	0.0112442	0.0112442
Nepl14	1.3e-35	1.87e-33	1.81922	0.146052	4.24928	0.938381	0.021032	0.0183138	0.0429611	0.0429611
Yp2	1.41e-35	2.01e-33	1.86393	0.149718	12.1942	1.00865	7.69e-06	0.0672386	0.0502331	0.0672386
SmydA-9	3.14e-35	4.43e-33	-0.842317	0.0680099	7.02074	0.205762	0.00100723	0.0124818	0.0128688	0.0128688
CG1468	4e-35	5.57e-33	1.97197	0.159468	6.26422	1.1299	0.00266969	0.0736208	0.0200963	0.0736208
CG9497	4.5e-35	6.2e-33	-1.15735	0.0936644	6.00981	0.375133	0.00374822	0.00706139	0.0225708	0.0225708
CG15412	6.05e-35	8.23e-33	-1.17783	0.0955053	5.8859	0.400649	0.00351407	0.0210185	0.0238497	0.0238497
CG6870	6.32e-35	8.5e-33	-1.88851	0.153175	5.6069	1.03666	0.00584375	0.0645444	0.0269118	0.0645444
yellow-f2	7.23e-35	9.61e-33	1.32535	0.107593	5.42608	0.493136	0.00572518	0.00975941	0.0290038	0.0290038
NKCC	1.6e-34	2.1e-32	-1.06175	0.0866434	6.27653	0.326674	0.00255113	0.0185986	0.0199701	0.0199701
CG46321	2.62e-34	3.4e-32	4.02969	0.329924	1.3217	4.72552	0.0877129	0.238836	0.193998	0.238836
Yp1	3.15e-34	4.04e-32	2.25229	0.184629	12.1736	1.47646	1.16e-05	0.102252	0.0495495	0.102252
Men	3.98e-34	5.06e-32	0.928638	0.076244	9.48165	0.251045	8.22e-05	0.0173573	0.0121973	0.0173573
CG10513	7.82e-34	9.83e-32	-1.78226	0.146995	7.10929	0.925236	0.00110303	0.0637198	0.0124322	0.0637198
CG42319	6.87e-33	8.54e-31	-1.0705	0.0896172	7.23363	0.334442	0.00120599	0.0228878	0.0119023	0.0228878
CG30046	9.74e-32	1.2e-29	1.15945	0.098905	5.7084	0.393124	0.00357525	0.025566	0.0257714	0.0257714
CG1561	1.07e-31	1.3e-29	-0.947577	0.0808869	7.18199	0.262726	0.000836967	0.0187911	0.0121113	0.0187911
ple	1.1e-31	1.32e-29	1.40627	0.120064	6.53023	0.578655	0.00179171	0.0414543	0.0171464	0.0414543
Nepl18	2.09e-31	2.49e-29	1.53918	0.132027	4.55277	0.683621	0.0130254	0.0282384	0.0392679	0.0392679
CG2736	5.46e-31	6.44e-29	1.96734	0.169952	6.48254	1.13435	0.00216976	0.0844815	0.0176867	0.0844815
Cpr67B	6.41e-31	7.48e-29	-1.0445	0.090338	7.10526	0.319797	0.000902111	0.0235807	0.0124509	0.0235807
ppl	6.8e-31	7.86e-29	0.697006	0.0603099	7.82766	0.139365	0.000438372	0.00711813	0.0104735	0.0104735
Idgf2	7.5e-31	8.59e-29	0.711193	0.0615825	7.56301	0.147296	0.000502317	0.00978503	0.0108749	0.0108749
CG6503	8.5e-31	9.63e-29	1.95609	0.169537	7.42657	1.12193	0.000875826	0.0853524	0.0112426	0.0853524
Zasp66	9.16e-31	1.03e-28	-0.784531	0.0680339	9.29625	0.180484	0.000153271	0.0137326	0.0115997	0.0137326
atk	9.32e-31	1.04e-28	2.17575	0.188705	3.63344	1.38817	0.0502716	0.0565567	0.0534895	0.0565567
CG45087	1.03e-30	1.12e-28	2.37941	0.206521	7.10221	1.6604	0.000717907	0.127235	0.0124651	0.127235
Pepck1	1.03e-30	1.12e-28	2.37941	0.206521	7.10221	1.6604	0.000717907	0.127235	0.0124651	0.127235
Uro	1.12e-30	1.21e-28	1.91466	0.166284	7.5185	1.0752	0.000820795	0.0821302	0.0109865	0.0821302
AttC	5.5e-30	5.88e-28	5.96081	0.523973	6.37331	10.4391	0.0275776	0.796066	0.0189249	0.796066
CG3984	5.66e-30	6e-28	4.4909	0.394851	3.70225	5.65456	0.415754	-0.246189	0.0519685	0.0519685
Dro	1.11e-29	1.17e-27	3.1743	0.280548	6.51576	2.9627	0.00870431	0.227418	0.0173096	0.227418
CG7720	1.29e-29	1.34e-27	-0.925726	0.0819097	6.44556	0.246954	0.00201952	0.0125389	0.0181081	0.0181081
DptB	2.91e-29	3e-27	5.67141	0.50503	5.69346	9.46786	0.0373351	0.727831	0.0259375	0.727831
mdy	3.21e-29	3.29e-27	0.743076	0.0662215	7.12656	0.159337	0.00080285	0.00881913	0.012353	0.012353
Tollo	5.07e-29	5.15e-27	0.791243	0.0707693	6.86715	0.181626	0.00118042	0.0107878	0.0138445	0.0138445
Ag5r	8.25e-29	8.3e-27	-1.03908	0.0932965	8.88039	0.318198	0.000199311	0.0259134	0.0106754	0.0259134
Obp99c	9.1e-29	9.07e-27	1.91299	0.171897	7.98456	1.07864	0.000630148	0.0880159	0.0103464	0.0880159
LManIII	9.6e-29	9.49e-27	5.72336	0.514512	2.95625	9.65564	0.132016	0.662152	0.074577	0.662152
CG17999	1.08e-28	1.06e-26	-2.68339	0.241452	3.48663	2.12279	0.0949102	0.0799867	0.0571625	0.0799867
Cyp313a1	1.13e-28	1.1e-26	-1.50742	0.135688	5.84704	0.669937	0.00354652	0.0516872	0.0242618	0.0516872
Alp4	1.43e-28	1.38e-26	-0.991995	0.089462	7.78658	0.290206	0.00043218	0.0235781	0.0105141	0.0235781
CG8539	2.07e-28	1.98e-26	1.85467	0.167767	4.31305	1.01489	0.0220971	0.0623403	0.0421432	0.0623403
fusl	4.45e-28	4.21e-26	1.14424	0.104151	5.78311	0.386661	0.00432343	0.028219	0.0249505	0.028219
Cyp28d1	6.18e-28	5.81e-26	1.18335	0.108004	6.29288	0.413717	0.00216443	0.0328301	0.0197998	0.0328301
Cpr49Ab	1.06e-27	9.87e-26	2.06619	0.189424	6.86236	1.26217	0.00164571	0.105999	0.0138813	0.105999
CG10799	1.43e-27	1.32e-25	1.18489	0.108901	6.31888	0.415243	0.00217411	0.0334044	0.019523	0.0334044
Gba1b	2.19e-27	2.01e-25	1.43262	0.132143	5.03821	0.60737	0.0102664	0.0421192	0.0336336	0.0421192
CG5849	2.55e-27	2.32e-25	1.18342	0.109298	5.34131	0.409006	0.00583341	0.0239275	0.0300051	0.0300051
CG42390	2.78e-27	2.51e-25	-1.05442	0.0974546	7.61088	0.32912	0.000544001	0.0279482	0.0107711	0.0279482
CG33120	2.97e-27	2.66e-25	1.66936	0.154376	5.30179	0.825021	0.00736658	0.0641293	0.0304751	0.0641293
Rh3	3.67e-27	3.26e-25	-0.908459	0.0841621	6.96151	0.244399	0.0010724	0.0201774	0.0131972	0.0201774
CG3902	4.33e-27	3.82e-25	0.651788	0.0604693	8.96943	0.121956	0.000141198	0.00656198	0.0108284	0.0108284
CG14257	4.87e-27	4.27e-25	-1.26598	0.117568	5.15095	0.473315	0.00918612	0.0306485	0.0322808	0.0322808
CG8665	5.44e-27	4.73e-25	1.79214	0.166588	5.17291	0.951627	0.00794386	0.0753111	0.0320173	0.0753111
Arr1	6.28e-27	5.42e-25	-0.795184	0.0740071	9.23072	0.187387	0.000108244	0.0163229	0.0114174	0.0163229
CG9664	8.96e-27	7.67e-25	1.11886	0.104451	5.54172	0.371167	0.00481331	0.0279167	0.0276579	0.0279167
Galt	1.04e-26	8.83e-25	0.989404	0.0924837	7.14919	0.290305	0.000858632	0.0248011	0.0122521	0.0248011
CG32695	1.06e-26	8.91e-25	1.39583	0.130493	6.30633	0.577803	0.00309894	0.0479863	0.0196575	0.0479863
CG18135	1.16e-26	9.69e-25	1.10044	0.102959	9.25753	0.359176	0.000122631	0.0316789	0.0114902	0.0316789
lncRNA:CR43411	1.66e-26	1.38e-24	2.38258	0.223624	3.26437	1.64311	0.0863559	0.0180605	0.0636671	0.0636671
fon	1.68e-26	1.38e-24	1.89893	0.178242	7.32266	1.07008	0.00106691	0.0942433	0.0115755	0.0942433
CG5493	2.45e-26	2.01e-24	2.06139	0.194133	4.67997	1.26169	0.0167505	0.0963124	0.0378089	0.0963124
Eaat2	3.88e-26	3.15e-24	-0.795177	0.0751912	6.67104	0.185195	0.00134026	0.012682	0.0156209	0.0156209
CG13324	6.56e-26	5.3e-24	2.49271	0.236816	6.37243	1.84757	0.00271916	0.165526	0.0189347	0.165526
lncRNA:CR31781	8.83e-26	7.09e-24	-1.16575	0.111046	7.58633	0.404261	0.000689867	0.0363041	0.0108221	0.0363041
CG9452	1.08e-25	8.62e-24	-1.23424	0.117785	5.02508	0.449409	0.00782895	0.0295137	0.0337908	0.0337908
Faa	1.2e-25	9.47e-24	1.16478	0.111257	5.25622	0.39806	0.00611503	0.024739	0.0310191	0.0310191
CG42324	1.36e-25	1.07e-23	1.07331	0.102642	5.73069	0.337351	0.00608151	0.0194063	0.0255248	0.0255248
lcs	1.36e-25	1.07e-23	-1.04251	0.0996911	9.73968	0.323512	6.23e-05	0.0297526	0.0132492	0.0297526
Obp57a	1.38e-25	1.07e-23	-0.751623	0.0718859	6.82374	0.165958	0.00131101	0.0117621	0.0141917	0.0141917
Thor	2.36e-25	1.82e-23	-1.20716	0.116019	8.38597	0.434137	0.00021859	0.0401628	0.0102188	0.0401628
Scp1	2.99e-25	2.29e-23	-0.889409	0.0856662	9.84265	0.235755	6.66e-05	0.0219495	0.0137485	0.0219495
Hayan	3.91e-25	2.98e-23	1.22291	0.118083	5.4769	0.443091	0.0134213	0.0253255	0.0284091	0.0284091
FASN1	4.88e-25	3.68e-23	1.43363	0.138711	9.61431	0.613013	9.09e-05	0.0576317	0.0127041	0.0576317
Pgd	5.01e-25	3.76e-23	0.615153	0.0595342	8.72269	0.112353	0.000172626	0.0098918	0.0104603	0.0104603
v	8.17e-25	6.09e-23	1.73426	0.168608	5.37846	0.897805	0.00685214	0.0784335	0.029565	0.0784335
alpha-Est2	1.25e-24	9.24e-23	1.83749	0.179356	4.90149	1.00856	0.0147467	0.0817589	0.0352586	0.0817589
CG6067	1.53e-24	1.13e-22	1.77773	0.173859	6.14657	0.944339	0.0030172	0.0876634	0.0212253	0.0876634
CG5597	2.02e-24	1.48e-22	-0.982336	0.0963267	7.07543	0.288484	0.000903977	0.0269325	0.0125929	0.0269325
CG2233	2.26e-24	1.64e-22	2.28496	0.224292	9.00563	1.56112	0.000245545	0.150675	0.0108974	0.150675
St1	2.48e-24	1.79e-22	1.08808	0.106902	5.4553	0.353992	0.00562285	0.0285944	0.0286613	0.0286613
CG14629	2.74e-24	1.97e-22	1.40247	0.137923	7.21088	0.588311	0.000924836	0.0561435	0.0119926	0.0561435
CG13078	3.35e-24	2.39e-22	-3.46155	0.341074	2.02218	3.46909	0.222542	-0.00125326	0.126452	0.126452
PH4alphaEFB	4.15e-24	2.94e-22	1.07443	0.106085	7.50778	0.345531	0.000534556	0.0332276	0.0110146	0.0332276
Spn88Eb	5.68e-24	4.01e-22	2.1409	0.212028	4.49158	1.37264	0.017543	0.117324	0.0399803	0.117324
CG9396	6.41e-24	4.46e-22	1.06864	0.105958	5.72282	0.342069	0.00451301	0.0291684	0.0256116	0.0291684
lncRNA:CR45045	6.4e-24	4.46e-22	3.62022	0.358949	3.31787	3.92576	0.140178	0.246356	0.062005	0.246356
sqa	6.58e-24	4.56e-22	-0.806014	0.0799394	7.20879	0.194608	0.00119593	0.017975	0.012001	0.017975
CG13641	6.9e-24	4.75e-22	2.28541	0.226767	3.73276	1.56472	0.0354641	0.118806	0.0513305	0.118806
CG15199	7.09e-24	4.85e-22	2.69337	0.267319	3.72452	2.09671	0.162878	-0.0327665	0.0515007	0.0515007
Oatp58Db	9.75e-24	6.63e-22	-1.36829	0.136229	5.80048	0.561221	0.0033009	0.0523738	0.0247621	0.0523738
CG33510	1.05e-23	7.07e-22	3.06797	0.305657	2.75416	2.79991	0.197143	0.0590271	0.0831359	0.0831359
Vml	1.57e-23	1.06e-21	1.53523	0.15357	9.48824	0.707118	0.000102936	0.0706481	0.0122209	0.0706481
Gel	1.85e-23	1.23e-21	0.869698	0.0871357	8.00087	0.226991	0.000415499	0.0223624	0.0103338	0.0223624
lncRNA:CR44707	2.4e-23	1.59e-21	1.32809	0.133407	4.53576	0.508048	0.0139276	0.0157825	0.0394649	0.0394649
Irk3	2.53e-23	1.67e-21	-1.10976	0.111539	6.20091	0.369811	0.00299733	0.0343255	0.020711	0.0343255
CG34136	2.67e-23	1.75e-21	1.51441	0.152286	4.57081	0.68873	0.0135904	0.0559831	0.0390596	0.0559831
Sclp	3.08e-23	2.01e-21	-0.897046	0.0903364	6.79612	0.241718	0.0018315	0.0226505	0.0144275	0.0226505
Sec61alpha	4.4e-23	2.86e-21	0.650851	0.0657801	9.66372	0.122555	7e-05	0.00765809	0.012911	0.012911
CG14439	5.52e-23	3.57e-21	0.903358	0.0915097	6.44396	0.245399	0.00181137	0.0233107	0.0181262	0.0233107
bdl	9.4e-23	6.03e-21	-0.831202	0.0846588	6.6657	0.207973	0.00137928	0.0201221	0.0156758	0.0201221
CG45080	1.78e-22	1.13e-20	-1.14452	0.11734	9.13126	0.394803	0.000139581	0.0411662	0.0111678	0.0411662
ry	1.95e-22	1.24e-20	0.954834	0.0979881	6.3751	0.274834	0.00168425	0.0271207	0.0189049	0.0271207
Mthfs	2.06e-22	1.3e-20	1.15982	0.119091	6.87799	0.405551	0.00166248	0.0408855	0.0137625	0.0408855
CG14022	2.18e-22	1.37e-20	-1.37713	0.141491	5.99588	0.571825	0.00314949	0.0569094	0.0227118	0.0569094
CG4335	2.44e-22	1.52e-20	1.8566	0.190976	4.79786	1.03955	0.0130092	0.0964066	0.0364602	0.0964066
Lip2	2.92e-22	1.82e-20	2.52998	0.260738	3.13123	1.78349	0.135863	-0.0942587	0.06809	0.06809
CG4461	3.11e-22	1.92e-20	-0.910054	0.0938503	7.31221	0.249894	0.000785984	0.0256377	0.0116118	0.0256377
ACC	4e-22	2.46e-20	1.16525	0.120489	8.93203	0.409904	0.000147124	0.0434056	0.0107613	0.0434056
tok	4.1e-22	2.51e-20	1.29061	0.133485	6.40201	0.502869	0.00201718	0.0514372	0.0186024	0.0514372
alpha-Est10	4.31e-22	2.62e-20	0.837962	0.0867146	6.21969	0.205828	0.0020234	0.0137337	0.0205349	0.0205349
smp-30	7.14e-22	4.32e-20	1.81506	0.188839	6.79473	0.995741	0.00203099	0.10495	0.0144397	0.10495
CG7059	7.19e-22	4.33e-20	-1.251	0.130165	4.65396	0.473027	0.0125401	0.0382885	0.038106	0.0382885
Mtp	7.95e-22	4.76e-20	0.575888	0.0599846	7.91082	0.0995843	0.000391309	0.0096574	0.0104032	0.0104032
sPLA2	8.84e-22	5.27e-20	1.28979	0.134498	5.19391	0.503036	0.00832414	0.0459453	0.0317654	0.0459453
lncRNA:CR33942	9.08e-22	5.39e-20	1.73033	0.18049	3.61253	0.866088	0.0437544	0.010733	0.0539756	0.0539756
trpl	9.6e-22	5.66e-20	-0.566103	0.059085	8.26226	0.0959218	0.00026869	0.00910342	0.0102044	0.0102044
jeb	1.08e-21	6.33e-20	-1.09811	0.114757	5.58695	0.364781	0.00562816	0.0338791	0.0271391	0.0338791
CG30371	1.49e-21	8.68e-20	-1.12288	0.117753	6.14158	0.381686	0.00249117	0.0391063	0.0212731	0.0391063
CG11459	1.62e-21	9.41e-20	2.12947	0.223521	4.08671	1.37298	0.0328802	0.117005	0.0452064	0.117005
CG17107	1.8e-21	1.04e-19	2.3246	0.244286	3.47519	1.63651	0.0809037	0.0981231	0.0574724	0.0981231
CG13075	1.84e-21	1.06e-19	1.57073	0.165103	4.04731	0.747212	0.0245971	0.0571799	0.0457933	0.0571799
CG16758	2.4e-21	1.37e-19	1.49017	0.157089	7.21347	0.672918	0.000910652	0.0731198	0.0119821	0.0731198
CG7882	2.73e-21	1.55e-19	-1.69162	0.178578	6.45322	0.867404	0.0027679	0.0929024	0.0180207	0.0929024
Mal-B2	2.92e-21	1.64e-19	0.582354	0.0615223	7.62318	0.102814	0.000544224	0.0108108	0.0107473	0.0108108
CG16704	2.91e-21	1.64e-19	2.03598	0.215084	5.37681	1.25668	0.0078883	0.130895	0.0295845	0.130895
jus	3.09e-21	1.73e-19	-0.874633	0.0924579	6.24745	0.231946	0.00197546	0.02367	0.0202648	0.02367
cv-d	3.22e-21	1.8e-19	1.16225	0.122919	5.97244	0.409616	0.00287045	0.0424565	0.0229507	0.0424565
Nplp2	3.33e-21	1.85e-19	1.85834	0.196611	8.93118	1.04727	0.000196129	0.115771	0.0107598	0.115771
CG15247	3.61e-21	2e-19	-0.959652	0.101623	6.07995	0.279328	0.0024761	0.0285057	0.0218718	0.0285057
CG9886	4.42e-21	2.43e-19	0.875244	0.0928921	6.08534	0.232457	0.00342242	0.0224644	0.0218188	0.0224644
CG44014	4.88e-21	2.67e-19	1.5178	0.161266	5.56151	0.699217	0.00544053	0.0725801	0.0274304	0.0725801
Lsd-1	5.62e-21	3.07e-19	2.07775	0.221112	6.80572	1.31072	0.00189161	0.144781	0.0143443	0.144781
CG9336	6.02e-21	3.27e-19	-0.775193	0.0825587	8.20116	0.182478	0.00030269	0.0201451	0.0102145	0.0201451
Obp83ef	6.25e-21	3.37e-19	1.54173	0.164262	3.6977	0.692272	0.0288809	0.0195407	0.0520655	0.0520655
CG11044	6.48e-21	3.48e-19	-1.11845	0.119212	4.97213	0.362111	0.00821132	0.0148339	0.0344234	0.0344234
Cyt-b5-r	6.95e-21	3.72e-19	1.84737	0.197063	7.66537	1.03667	0.00085194	0.115649	0.0106731	0.115649
CG8586	7.08e-21	3.77e-19	0.822187	0.0877222	6.53988	0.205348	0.00160351	0.021482	0.0170379	0.021482
AttB	7.22e-21	3.83e-19	3.88617	0.414725	5.75334	4.5879	0.0140062	0.501984	0.0252756	0.501984
Ank2	7.51e-21	3.97e-19	-0.631745	0.0674489	7.85903	0.121253	0.00140222	0.0122458	0.0104455	0.0122458
Oat	8.23e-21	4.33e-19	1.10977	0.118608	7.66272	0.374256	0.000539125	0.0416646	0.0106775	0.0416646
CG32751	8.58e-21	4.49e-19	-3.00362	0.321166	5.52398	2.74178	0.0091664	0.300277	0.0278627	0.300277
Capa	1.13e-20	5.88e-19	-1.07121	0.114899	5.1004	0.348325	0.00671749	0.0321902	0.0328878	0.0328878
Hex-C	1.16e-20	6.04e-19	1.03788	0.111361	7.1961	0.327599	0.000855761	0.036348	0.0120527	0.036348
CG11400	1.35e-20	6.97e-19	0.825178	0.0886887	6.18987	0.205803	0.00278251	0.0193253	0.0208146	0.0208146
CG8303	1.44e-20	7.4e-19	1.12103	0.120575	7.60613	0.382388	0.00053542	0.0430797	0.0107806	0.0430797
CG8858	1.49e-20	7.63e-19	0.603825	0.0649718	8.10699	0.11095	0.000356553	0.0123075	0.0102545	0.0123075
Amyrel	1.51e-20	7.67e-19	4.74541	0.510665	3.32743	6.85275	0.177056	0.60528	0.0617146	0.60528
CG9702	1.68e-20	8.53e-19	-1.34003	0.144387	5.94668	0.546585	0.00304043	0.059502	0.0232156	0.059502
CG3556	1.82e-20	9.18e-19	-0.910222	0.0981636	5.91506	0.252236	0.00265333	0.0262549	0.0235439	0.0262549
CG12239	2.03e-20	1.02e-18	-0.907301	0.0979709	6.20945	0.250685	0.00223843	0.0265564	0.0206313	0.0265564
CG18107	3.04e-20	1.52e-18	1.16712	0.126621	6.29057	0.415224	0.00229497	0.0458036	0.019824	0.0458036
CG34426	3.36e-20	1.67e-18	0.89773	0.0975076	5.77359	0.236005	0.00346907	0.0143605	0.0250541	0.0250541
CG33337	3.76e-20	1.87e-18	4.06476	0.442081	1.33923	5.03908	0.0354743	0.550833	0.19189	0.550833
CG13325	4.13e-20	2.04e-18	2.94696	0.320861	5.56393	2.64929	0.0126006	0.296255	0.0274025	0.296255
PGRP-SA	4.88e-20	2.4e-18	1.46981	0.160342	4.89147	0.6593	0.0127267	0.0644019	0.0353759	0.0644019
Ir7c	5.97e-20	2.93e-18	1.11874	0.122336	7.26757	0.382157	0.000806639	0.0440919	0.0117729	0.0440919
CG34212	7.47e-20	3.64e-18	-1.33914	0.146824	7.71164	0.54787	0.000699027	0.0639732	0.0106041	0.0639732
CG33493	8.94e-20	4.34e-18	0.963374	0.105852	5.90663	0.283674	0.00284679	0.0307673	0.023632	0.0307673
Pisd	1.09e-19	5.26e-18	0.536304	0.059065	8.47653	0.0817195	0.000209599	0.00339533	0.0102564	0.0102564
IM33	1.12e-19	5.39e-18	1.26963	0.139876	8.037	0.492983	0.000392842	0.058303	0.0103047	0.058303
trp	1.34e-19	6.43e-18	-0.571453	0.0630953	8.17341	0.0999188	0.000305757	0.0116373	0.0102232	0.0116373
CG4459	1.36e-19	6.51e-18	-2.69647	0.297779	2.66599	2.10566	0.178751	-0.0438069	0.0872666	0.0872666
CG33281	1.52e-19	7.21e-18	1.05453	0.116605	5.07104	0.324982	0.00755022	0.01632	0.03324	0.03324
CG7214	1.52e-19	7.22e-18	1.60376	0.177346	4.82715	0.787244	0.0117679	0.0825872	0.0361228	0.0825872
GstE4	1.89e-19	8.9e-18	-1.11074	0.123147	4.91517	0.377838	0.00900412	0.0364915	0.0350981	0.0364915
CG3397	2.38e-19	1.12e-17	0.639325	0.0710834	6.85468	0.123187	0.00121735	0.0116677	0.0139412	0.0139412
scrt	2.54e-19	1.19e-17	-0.916949	0.102031	5.72881	0.257699	0.0033915	0.0278393	0.0255455	0.0278393
Cubn	2.78e-19	1.3e-17	0.703493	0.0783656	6.54886	0.150877	0.00148618	0.0160076	0.0169373	0.0169373
DCP2	2.85e-19	1.32e-17	0.527534	0.0587824	8.31617	0.0846058	0.000160967	0.00941787	0.0102052	0.0102052
CG5958	2.96e-19	1.37e-17	1.6558	0.184589	7.84655	0.840655	0.000610631	0.101609	0.0104564	0.101609
CG40486	3.14e-19	1.45e-17	-1.04136	0.116176	5.74782	0.332561	0.0033442	0.037146	0.0253362	0.037146
Arr2	4.59e-19	2.11e-17	-0.79858	0.0895091	9.32245	0.195777	8.52e-05	0.0239505	0.0116768	0.0239505
CG5321	5.84e-19	2.67e-17	1.15013	0.129299	5.53829	0.406356	0.00560358	0.0445511	0.0276974	0.0445511
REPTOR-BP	6.01e-19	2.73e-17	-0.832191	0.0935896	6.6911	0.212763	0.00143007	0.024847	0.0154171	0.024847
FarO	6.55e-19	2.97e-17	1.28648	0.144837	5.72362	0.508581	0.00393398	0.0589994	0.0256027	0.0589994
CG34331	6.87e-19	3.1e-17	1.13686	0.128069	5.06742	0.39722	0.0075496	0.0416552	0.0332835	0.0416552
Hn	7.11e-19	3.2e-17	1.01346	0.114217	6.99649	0.315699	0.00108323	0.0380534	0.0129978	0.0380534
CG34253	8.4e-19	3.77e-17	1.24474	0.140577	4.25647	0.45535	0.0164184	0.0196501	0.0428675	0.0428675
CG11073	8.54e-19	3.81e-17	-0.658231	0.0743534	7.18696	0.133241	0.00139818	0.0151871	0.0120906	0.0151871
ndl	1.61e-18	7.18e-17	1.38859	0.158128	7.86242	0.594059	0.000463243	0.0745498	0.0104426	0.0745498
CG13311	1.78e-18	7.89e-17	1.15962	0.132222	4.54957	0.394446	0.0131431	0.0173296	0.0393049	0.0393049
CecC	2.12e-18	9.34e-17	5.26582	0.601745	3.25073	8.54994	0.099261	0.987028	0.0641012	0.987028
regucalcin	2.5e-18	1.1e-16	0.669386	0.0766562	7.82739	0.138229	0.000452831	0.0171757	0.0104737	0.0171757
CG10307	3.06e-18	1.34e-16	-1.01969	0.117082	5.62411	0.320962	0.0047782	0.0363465	0.0267166	0.0363465
mmd	3.09e-18	1.35e-16	-0.766978	0.0880781	6.30886	0.181591	0.00205521	0.021218	0.0196304	0.021218
dsb	3.26e-18	1.42e-16	0.913961	0.105027	6.18643	0.257899	0.00255411	0.0305377	0.0208469	0.0305377
CecB	3.45e-18	1.49e-16	4.56144	0.524565	2.46963	6.42502	0.117959	0.707545	0.0974305	0.707545
Fie	4.17e-18	1.8e-16	-0.789997	0.0910756	6.0424	0.184487	0.00264065	0.0130669	0.0222436	0.0222436
OS9	4.25e-18	1.83e-16	-1.00215	0.115563	6.05706	0.310322	0.00261032	0.0374542	0.0220979	0.0374542
AQP	5.53e-18	2.37e-16	-0.728408	0.0842873	6.32728	0.158238	0.00188088	0.0130074	0.0194322	0.0194322
CG15155	6.4e-18	2.73e-16	1.17263	0.135955	6.88891	0.425426	0.00121151	0.0542395	0.0136818	0.0542395
CG5612	6.97e-18	2.96e-16	-0.851921	0.0988828	6.33363	0.224604	0.00195291	0.0273805	0.0193632	0.0273805
CG6867	8.07e-18	3.42e-16	-1.0782	0.125392	4.70785	0.330193	0.00967867	0.00478171	0.0374906	0.0374906
CG14823	8.43e-18	3.55e-16	0.981324	0.114194	5.12465	0.291244	0.00652388	0.0249451	0.0325966	0.0325966
CG9616	8.43e-18	3.55e-16	2.42446	0.282125	3.16971	1.82017	0.113218	0.125566	0.0667682	0.125566
Obp83b	8.59e-18	3.6e-16	-1.13761	0.132412	6.18998	0.400766	0.00245555	0.050143	0.0208135	0.050143
Had1	1.28e-17	5.32e-16	1.06111	0.124166	8.41472	0.349126	0.000300165	0.0459515	0.0102284	0.0459515
LManVI	1.34e-17	5.58e-16	4.9248	0.576678	4.56101	7.52162	0.133876	0.863797	0.0391727	0.863797
Jhedup	1.36e-17	5.65e-16	-0.834978	0.0977935	6.02028	0.216225	0.002793	0.0258977	0.0224653	0.0258977
CG6912	1.85e-17	7.63e-16	2.01018	0.236409	3.03456	1.1998	0.0960931	0.0114352	0.0715744	0.0715744
CG43114	1.91e-17	7.85e-16	1.53063	0.180089	4.98706	0.727406	0.00872516	0.0885714	0.0342454	0.0885714
Vps13	2.11e-17	8.63e-16	0.65307	0.0769419	8.03702	0.132464	0.000379509	0.0173806	0.0103047	0.0173806
GNBP3	2.3e-17	9.41e-16	0.887466	0.104686	5.98435	0.244687	0.00339717	0.0294802	0.022829	0.0294802
NimB5	2.56e-17	1.04e-15	1.10395	0.130416	4.66836	0.374244	0.0130837	0.0329712	0.0379415	0.0379415
CG14989	2.67e-17	1.08e-15	-1.10788	0.130954	6.9387	0.381515	0.00103229	0.0504142	0.0133394	0.0504142
CG16826	3.06e-17	1.24e-15	-1.02349	0.121208	10.8191	0.325759	2.43e-05	0.0440498	0.0215436	0.0440498
LTV1	3.25e-17	1.31e-15	-0.633051	0.0750316	8.88397	0.12465	0.000156328	0.0167329	0.0106811	0.0167329
CG31097	3.64e-17	1.46e-15	-1.2707	0.150846	4.0703	0.494172	0.0228149	0.0363724	0.0454485	0.0454485
Tsp42En	4.49e-17	1.79e-15	-1.17061	0.139369	4.37135	0.407519	0.0168521	0.0203233	0.0414192	0.0414192
se	4.48e-17	1.79e-15	-0.977903	0.116424	5.03435	0.296233	0.00698385	0.031984	0.0336798	0.0336798
CG30285	4.61e-17	1.83e-15	-0.938891	0.111822	5.25337	0.257363	0.00645952	0.0121855	0.0310531	0.0310531
CG1979	4.82e-17	1.91e-15	1.90225	0.226698	3.25978	1.12704	0.0728821	0.0812945	0.0638127	0.0812945
Gbeta76C	4.86e-17	1.92e-15	-0.557071	0.066396	7.12691	0.095909	0.000873905	0.0115274	0.0123514	0.0123514
Spat	6.45e-17	2.54e-15	0.945123	0.113097	6.8154	0.2785	0.00118347	0.0371893	0.0142618	0.0371893
Cyp6a17	6.9e-17	2.7e-15	-0.616429	0.0738352	6.83098	0.1185	0.00126691	0.015088	0.0141318	0.015088
Obp83cd	7.06e-17	2.76e-15	1.39104	0.166669	3.76293	0.589819	0.0326159	0.0356911	0.05072	0.05072
CG13124	7.19e-17	2.8e-15	-0.599737	0.0718776	8.24111	0.112186	0.000272165	0.015227	0.0102066	0.015227
fne	7.96e-17	3.09e-15	-1.08148	0.129801	7.05286	0.364931	0.00137308	0.0491718	0.0127042	0.0491718
CG5162	8.1e-17	3.13e-15	0.75092	0.0901492	6.81537	0.17595	0.00104427	0.0233364	0.014262	0.0233364
CG42329	8.36e-17	3.22e-15	0.878386	0.105498	5.45768	0.234278	0.00475607	0.0214814	0.0286334	0.0286334
CG4847	9.18e-17	3.53e-15	0.851865	0.10245	7.10911	0.226536	0.000885645	0.0306022	0.012433	0.0306022
CG31030	9.98e-17	3.82e-15	-0.804603	0.0968813	5.76267	0.198645	0.0029846	0.021309	0.0251734	0.0251734
Grik	1.04e-16	3.96e-15	-0.869355	0.104736	5.46172	0.23397	0.00432265	0.0263107	0.0285863	0.0285863
Idgf5	1.05e-16	4.01e-15	2.21261	0.266628	5.4091	1.52906	0.00778672	0.205485	0.0292036	0.205485
whe	1.07e-16	4.06e-15	-1.16051	0.139877	10.1984	0.420665	4.49e-05	0.0586519	0.0158796	0.0586519
ChAT	1.15e-16	4.35e-15	-0.944492	0.113958	5.26804	0.278708	0.00636179	0.0325973	0.0308778	0.0325973
Ance-4	1.22e-16	4.59e-15	1.72483	0.208281	5.21947	0.929683	0.00862321	0.12152	0.0314589	0.12152
18w	1.26e-16	4.75e-15	0.772251	0.0933026	6.49652	0.186389	0.00158592	0.0245302	0.0175278	0.0245302
Nep6	1.35e-16	5.04e-15	1.9113	0.231128	5.61348	1.14198	0.00515581	0.155105	0.026837	0.155105
LKRSDH	1.38e-16	5.14e-15	1.10068	0.13315	5.4548	0.37876	0.00491874	0.0482676	0.0286671	0.0482676
tyn	1.4e-16	5.19e-15	0.790786	0.095677	5.84106	0.194581	0.00313659	0.0232996	0.0243257	0.0243257
Nepl6	1.42e-16	5.25e-15	1.66236	0.201176	3.87811	0.864044	0.0311826	0.0902328	0.0485588	0.0902328
Nmdmc	1.46e-16	5.4e-15	0.808379	0.0978725	7.52071	0.204345	0.000649084	0.028088	0.0109807	0.028088
Proc	1.5e-16	5.53e-15	-1.04524	0.126597	5.82199	0.341669	0.00356596	0.0445148	0.0245301	0.0445148
Megf8	1.62e-16	5.96e-15	0.636597	0.0771905	7.25588	0.126774	0.000811819	0.0170633	0.0118168	0.0170633
GstE3	1.8e-16	6.57e-15	1.44349	0.175288	6.22604	0.652073	0.00249383	0.0896835	0.0204741	0.0896835
FMRFa	1.85e-16	6.73e-15	-0.989657	0.120226	4.91525	0.303739	0.0082654	0.032021	0.0350972	0.0350972
Chc	1.88e-16	6.84e-15	0.558184	0.067828	9.84321	0.0948926	5.06e-05	0.0108603	0.0137513	0.0137513
CG32645	1.96e-16	7.11e-15	0.887763	0.107942	6.42363	0.24672	0.00169523	0.0332595	0.0183575	0.0332595
Acbp2	2.3e-16	8.31e-15	1.16866	0.142427	7.91681	0.427806	0.000413754	0.0604425	0.0103985	0.0604425
CG14109	2.31e-16	8.33e-15	-0.946898	0.115409	6.26799	0.280857	0.00231102	0.037647	0.0200579	0.037647
CG14984	2.49e-16	8.93e-15	-0.907295	0.1107	5.30577	0.255925	0.00633605	0.0282267	0.0304277	0.0304277
rtp	2.83e-16	1.01e-14	-0.69051	0.084411	6.67204	0.14947	0.00135734	0.0200183	0.0156106	0.0200183
nec	3.08e-16	1.1e-14	0.741679	0.090778	7.15901	0.172498	0.000810184	0.0239117	0.0122093	0.0239117
Spn43Ab	3.49e-16	1.24e-14	0.958183	0.117493	7.40961	0.288044	0.000642149	0.0407718	0.0112936	0.0407718
CG32191	3.59e-16	1.27e-14	1.25729	0.154235	4.52784	0.495998	0.0139539	0.0574113	0.039557	0.0574113
Adh	3.67e-16	1.3e-14	0.776069	0.0952344	11.2299	0.185851	1.77e-05	0.0237333	0.0271911	0.0271911
Ugt49B1	3.89e-16	1.37e-14	0.903904	0.111017	6.3879	0.256443	0.00179991	0.0351742	0.0187614	0.0351742
ergic53	4.07e-16	1.43e-14	0.49027	0.0602569	8.41073	0.0754566	0.000232156	0.0106605	0.0102269	0.0106605
Cpr49Ag	4.26e-16	1.49e-14	-1.30386	0.160359	3.83154	0.522085	0.0277434	0.0365367	0.049402	0.049402
CG32573	5.36e-16	1.87e-14	1.14568	0.14139	5.2512	0.412496	0.00760723	0.0523663	0.0310791	0.0523663
Neurl4	5.55e-16	1.93e-14	0.603858	0.0745609	7.33108	0.11461	0.000684613	0.0159934	0.0115467	0.0159934
Nep7	5.84e-16	2.03e-14	1.07283	0.132568	4.56642	0.338756	0.0136124	0.0137326	0.0391103	0.0391103
CG18249	5.88e-16	2.04e-14	1.01621	0.125586	4.75852	0.310016	0.010404	0.0208122	0.0369114	0.0369114
CG8888	7.37e-16	2.55e-14	-0.728064	0.0902841	6.08708	0.164665	0.00265197	0.0194561	0.0218017	0.0218017
CG43071	7.44e-16	2.56e-14	2.50159	0.310252	3.73208	1.96924	0.107335	0.181434	0.0513444	0.181434
CG10483	7.74e-16	2.66e-14	-1.01583	0.126061	4.76109	0.301772	0.0107924	0.0115822	0.0368821	0.0368821
antdh	9.73e-16	3.33e-14	-0.800345	0.0996669	6.09866	0.201788	0.00244848	0.027352	0.0216884	0.027352
Fkbp14	9.9e-16	3.35e-14	0.47582	0.059269	8.16282	0.0681552	0.000311317	0.00673791	0.0102271	0.0102271
CG43630	9.85e-16	3.35e-14	-1.25661	0.156514	4.79237	0.497465	0.00954851	0.0639416	0.0365233	0.0639416
Cp7Fc	9.89e-16	3.35e-14	0.848608	0.105704	9.45364	0.226873	8.96e-05	0.0334302	0.012099	0.0334302
CG31326	1.04e-15	3.52e-14	1.2381	0.154338	6.23406	0.483023	0.00247156	0.0689892	0.0203965	0.0689892
Sox102F	1.07e-15	3.59e-14	0.976916	0.121824	5.78721	0.300757	0.00384139	0.0406819	0.024906	0.0406819
Obp83a	1.08e-15	3.62e-14	-1.18093	0.147291	6.80727	0.43951	0.00138797	0.0636957	0.014331	0.0636957
CG6908	1.1e-15	3.69e-14	1.09195	0.136237	5.63751	0.375809	0.00396427	0.0517171	0.026565	0.0517171
CG31221	1.13e-15	3.79e-14	-0.782691	0.0976974	6.91232	0.193106	0.00109452	0.0275398	0.0135155	0.0275398
CG8708	1.15e-15	3.83e-14	-1.28007	0.159816	4.57308	0.516544	0.0113339	0.06529	0.0390334	0.06529
inaC	1.18e-15	3.93e-14	-0.595386	0.0743654	6.69724	0.103509	0.00123507	0.00627971	0.0153556	0.0153556
tn	1.21e-15	4.01e-14	-0.733818	0.0916872	7.80243	0.169787	0.000469134	0.0247505	0.0104978	0.0247505
Cpr47Ef	1.25e-15	4.12e-14	-0.972111	0.121518	5.44334	0.298	0.00486891	0.0394308	0.0288013	0.0394308
CG32599	1.28e-15	4.2e-14	-1.21418	0.151831	4.06302	0.464935	0.0183645	0.0507938	0.0455569	0.0507938
RIC-3	1.34e-15	4.41e-14	-0.545024	0.0682074	7.00288	0.0883398	0.000993334	0.00706501	0.0129634	0.0129634
Vm32E	1.35e-15	4.44e-14	1.29252	0.161777	9.34542	0.527	0.000128723	0.0783865	0.0117462	0.0783865
TM4SF	1.4e-15	4.56e-14	-0.766663	0.0960025	6.26969	0.185437	0.00273023	0.0249192	0.0200404	0.0249192
Obp19d	1.46e-15	4.74e-14	-0.916516	0.114842	8.71565	0.265061	0.00028803	0.0392782	0.0104524	0.0392782
lncRNA:CR44404	1.48e-15	4.8e-14	4.17578	0.523369	2.85454	5.50261	0.146055	0.675689	0.0787326	0.675689
AttA	1.55e-15	5.01e-14	3.41272	0.428028	4.67333	3.67602	0.032515	0.517109	0.0378848	0.517109
CecA2	1.62e-15	5.23e-14	4.10146	0.514772	3.42458	5.31051	0.182259	0.612712	0.0588745	0.612712
aralar1	1.68e-15	5.39e-14	0.475047	0.0596545	8.77445	0.070699	0.000152818	0.00991511	0.0105232	0.0105232
MFS3	1.72e-15	5.52e-14	-1.09386	0.137419	4.3387	0.340585	0.01483	0.000852482	0.0418221	0.0418221
CG4213	1.75e-15	5.6e-14	-0.976909	0.122759	6.04217	0.301377	0.0028425	0.0423669	0.022246	0.0423669
mTerf3	1.77e-15	5.66e-14	-0.646188	0.0812179	7.5957	0.13187	0.000522941	0.0192661	0.0108021	0.0192661
IM18	1.81e-15	5.78e-14	5.48409	0.689525	4.89262	9.49901	0.117573	1.30876	0.0353624	1.30876
PAPLA1	1.89e-15	6e-14	0.470649	0.0592123	8.18761	0.0686246	0.000299841	0.00873406	0.0102184	0.0102184
CG11275	1.96e-15	6.2e-14	-0.60365	0.0759886	6.64784	0.110895	0.00146119	0.0112046	0.0158616	0.0158616
Nplp3	2.02e-15	6.39e-14	-0.812446	0.102324	8.23592	0.208574	0.000288733	0.031122	0.0102073	0.031122
Cpr72Ec	2.12e-15	6.67e-14	-1.10184	0.13887	5.43497	0.383698	0.00453368	0.0533212	0.0288994	0.0533212
Xport-B	2.49e-15	7.83e-14	-0.892318	0.112752	5.10011	0.234226	0.00524821	0.0135313	0.0328912	0.0328912
FER	2.58e-15	8.08e-14	-0.611484	0.0773077	6.92717	0.118276	0.00142296	0.0165065	0.0134149	0.0165065
Fbp1	2.87e-15	8.95e-14	3.08881	0.391155	2.49992	3.0193	0.132299	0.326709	0.0957708	0.326709
Cpn	3.05e-15	9.5e-14	-0.737558	0.0934925	5.94542	0.160352	0.00299395	0.0101962	0.0232286	0.0232286
CG14630	3.37e-15	1.05e-13	1.62183	0.205913	6.20102	0.833	0.00484062	0.12236	0.02071	0.12236
CG4995	4.16e-15	1.29e-13	1.67453	0.213318	3.98874	0.888842	0.0315233	0.104991	0.0467027	0.104991
Cad88C	4.54e-15	1.4e-13	1.16847	0.149059	5.54605	0.43296	0.00479854	0.0618575	0.027608	0.0618575
tobi	4.65e-15	1.43e-13	3.17893	0.405686	6.98855	3.20494	0.00303027	0.490713	0.0130412	0.490713
Pdf	4.68e-15	1.44e-13	-1.01612	0.129684	4.57321	0.311309	0.0114223	0.0212705	0.0390319	0.0390319
nAChRbeta1	5.14e-15	1.58e-13	-0.757628	0.0968403	6.48956	0.182122	0.00200416	0.02613	0.0176068	0.02613
CG42397	5.43e-15	1.66e-13	-1.61618	0.206766	6.35599	0.828971	0.00244012	0.125816	0.0191174	0.125816
CG2070	5.49e-15	1.67e-13	1.6856	0.215681	4.55091	0.901753	0.0182897	0.121266	0.0392895	0.121266
CG31345	5.94e-15	1.81e-13	-1.02389	0.131179	4.52026	0.321654	0.0119788	0.0273331	0.0396451	0.0396451
Rim	6.05e-15	1.84e-13	-0.683607	0.0876096	6.15288	0.145308	0.00186137	0.0177823	0.021165	0.021165
Wnt6	6.14e-15	1.85e-13	-0.863164	0.110647	5.20526	0.227192	0.00509905	0.0212969	0.0316293	0.0316293
Elal	6.12e-15	1.85e-13	1.50172	0.192494	6.38389	0.716097	0.00217927	0.108982	0.0188064	0.108982
Pkcdelta	6.31e-15	1.9e-13	-0.841311	0.107893	6.40311	0.224785	0.00171158	0.0332111	0.01859	0.0332111
nAChRalpha1	6.41e-15	1.93e-13	-1.14973	0.147486	4.46989	0.419837	0.0108862	0.05437	0.0402355	0.05437
CG5966	6.79e-15	2.03e-13	0.639786	0.0821463	7.26246	0.130038	0.000841942	0.0194021	0.011792	0.0194021
Hasp	6.96e-15	2.08e-13	-0.657867	0.0845025	7.94743	0.137508	0.00136324	0.0200588	0.0103749	0.0200588
Zip42C.2	7.77e-15	2.32e-13	-3.22586	0.415104	2.22021	3.30798	0.188389	0.328544	0.112502	0.328544
CG14499	8.07e-15	2.4e-13	2.92653	0.376817	1.64806	2.72304	0.189933	0.23604	0.158547	0.23604
CG16756	8.3e-15	2.46e-13	1.37102	0.176611	5.15504	0.597713	0.0081163	0.0854578	0.0322317	0.0854578
ATPCL	9.71e-15	2.87e-13	0.808596	0.104428	9.24437	0.208058	0.000111397	0.0326045	0.0114541	0.0326045
yellow-f	9.79e-15	2.88e-13	1.30923	0.16911	4.13277	0.545475	0.0190951	0.0666992	0.0445433	0.0666992
Adk1	9.78e-15	2.88e-13	-0.59854	0.0773102	7.47225	0.114005	0.000624108	0.0173065	0.0111111	0.0173065
CG33178	1.04e-14	3.06e-13	-0.90186	0.116608	5.33868	0.258907	0.00639914	0.0343932	0.0300364	0.0343932
CG13133	1.11e-14	3.24e-13	-1.02363	0.132484	4.53051	0.323922	0.0131298	0.0288356	0.0395259	0.0395259
CG34054	1.16e-14	3.4e-13	1.56602	0.202855	3.79225	0.781073	0.0321163	0.0913343	0.050145	0.0913343
CG43236	1.19e-14	3.45e-13	3.84087	0.497686	3.92703	4.69888	0.188452	0.554621	0.047714	0.554621
CG44142	1.19e-14	3.45e-13	-1.07892	0.139803	6.84321	0.37078	0.00129171	0.0573426	0.0140324	0.0573426
CG13360	1.19e-14	3.46e-13	0.9402	0.121842	6.64658	0.281571	0.00130147	0.0432346	0.0158748	0.0432346
lin-28	1.24e-14	3.58e-13	-2.33413	0.302665	2.47152	1.7357	0.171522	0.103297	0.0973258	0.103297
CG4239	1.25e-14	3.6e-13	-0.517687	0.0671349	7.06813	0.0764552	0.000892754	0.00280802	0.0126285	0.0126285
sals	1.27e-14	3.66e-13	-0.752676	0.0976428	7.27208	0.180508	0.00100165	0.0276007	0.0117561	0.0276007
CG33109	1.33e-14	3.8e-13	-0.767064	0.099576	8.07174	0.187511	0.000306544	0.0294396	0.0102776	0.0294396
Obp56e	1.42e-14	4.05e-13	-1.44828	0.188211	6.10611	0.668659	0.00276048	0.10351	0.0216158	0.10351
Kah	1.63e-14	4.65e-13	-1.02135	0.133041	4.88939	0.332767	0.00905269	0.0440471	0.0354002	0.0440471
CG15293	1.66e-14	4.73e-13	1.88311	0.245373	6.80731	1.13133	0.00226623	0.178357	0.0143306	0.178357
CG14655	1.7e-14	4.83e-13	-0.82126	0.107055	5.40567	0.206165	0.00513864	0.0193026	0.0292439	0.0292439
Pfas	2.01e-14	5.71e-13	0.453784	0.0593205	8.65881	0.065406	0.000163761	0.0100067	0.010393	0.010393
Mal-A4	2.69e-14	7.61e-13	4.44336	0.5837	4.67774	6.31377	0.0859898	0.936127	0.0378343	0.936127
mahe	2.84e-14	7.99e-13	0.467272	0.0614394	9.15266	0.0618633	0.000105633	0.00244122	0.0112188	0.0112188
Cyp4p1	2.84e-14	7.99e-13	0.696752	0.0916134	6.56611	0.155289	0.00147125	0.0237078	0.0167452	0.0237078
Npc2e	3e-14	8.4e-13	3.91091	0.514694	5.34815	4.89391	0.117107	0.677622	0.0299239	0.677622
CG7443	3.15e-14	8.83e-13	-0.941018	0.123951	7.34006	0.283405	0.000742247	0.0453491	0.0115163	0.0453491
drd	3.34e-14	9.33e-13	1.23982	0.163471	6.61707	0.492103	0.00170066	0.0784681	0.0161883	0.0784681
CG31869	3.62e-14	1.01e-12	1.05617	0.139447	7.15315	0.357259	0.000823966	0.0575128	0.0122347	0.0575128
Orco	3.64e-14	1.01e-12	-0.900098	0.118852	4.92721	0.240555	0.00742122	0.0141358	0.0349563	0.0349563
Tsf1	3.66e-14	1.02e-12	1.09767	0.144956	8.30542	0.385911	0.000346431	0.0626905	0.0102043	0.0626905
pyd3	3.77e-14	1.04e-12	0.614907	0.0812423	6.75594	0.121122	0.00107157	0.0187294	0.0147896	0.0187294
pros	5.6e-14	1.55e-12	-0.978585	0.130181	6.96012	0.307391	0.00074521	0.050096	0.0132056	0.050096
fau	5.64e-14	1.55e-12	-0.56492	0.0751605	8.53851	0.102443	0.000218102	0.0167292	0.0102942	0.0167292
CG32687	5.7e-14	1.57e-12	1.11417	0.148264	7.18877	0.398507	0.000858151	0.0650886	0.012083	0.0650886
CG18628	5.93e-14	1.63e-12	-1.01203	0.134765	8.2377	0.328858	0.000301481	0.0541835	0.0102071	0.0541835
drl	6.45e-14	1.76e-12	-0.890145	0.118708	5.05725	0.25453	0.00725921	0.0350159	0.0334054	0.0350159
Ser7	6.47e-14	1.76e-12	0.875027	0.116698	5.73184	0.245961	0.00378596	0.0370694	0.0255121	0.0370694
CG31106	7.16e-14	1.95e-12	-0.756527	0.101074	5.81215	0.183953	0.00324835	0.0273998	0.024636	0.0273998
aay	7.73e-14	2.1e-12	0.445945	0.0596595	8.78271	0.0629641	0.000143856	0.00945651	0.0105339	0.0105339
PIG-O	7.99e-14	2.16e-12	0.464054	0.0621181	7.51077	0.0667031	0.000569211	0.00820042	0.0110068	0.0110068
Eip74EF	8.14e-14	2.2e-12	0.965695	0.129311	6.31446	0.29994	0.00194701	0.0482168	0.0195705	0.0482168
klg	8.33e-14	2.24e-12	-0.805898	0.107957	5.37133	0.198472	0.00531458	0.018163	0.0296493	0.0296493
LRP1	8.43e-14	2.27e-12	0.556415	0.0745519	8.08057	0.099594	0.000331108	0.0163428	0.0102714	0.0163428
AhcyL2	8.53e-14	2.29e-12	-0.868571	0.116402	5.45492	0.242702	0.00497677	0.0356713	0.0286658	0.0356713
Pat1	9.16e-14	2.45e-12	0.443337	0.059488	8.04918	0.0617179	0.000321751	0.00860375	0.0102947	0.0102947
His4:CG33909	9.74e-14	2.55e-12	-0.93414	0.125482	5.35747	0.280929	0.00069661	0.0465404	0.0298134	0.0465404
His4:CG33905	9.74e-14	2.55e-12	-0.93414	0.125482	5.35747	0.280929	0.00069661	0.0465404	0.0298134	0.0465404
His4:CG33903	9.74e-14	2.55e-12	-0.93414	0.125482	5.35747	0.280929	0.00069661	0.0465404	0.0298134	0.0465404
His4:CG33901	9.74e-14	2.55e-12	-0.93414	0.125482	5.35747	0.280929	0.00069661	0.0465404	0.0298134	0.0465404
His4:CG33889	9.74e-14	2.55e-12	-0.93414	0.125482	5.35747	0.280929	0.00069661	0.0465404	0.0298134	0.0465404
His4:CG33887	9.74e-14	2.55e-12	-0.93414	0.125482	5.35747	0.280929	0.00069661	0.0465404	0.0298134	0.0465404
His4:CG33885	9.74e-14	2.55e-12	-0.93414	0.125482	5.35747	0.280929	0.00069661	0.0465404	0.0298134	0.0465404
His4:CG33883	9.74e-14	2.55e-12	-0.93414	0.125482	5.35747	0.280929	0.00069661	0.0465404	0.0298134	0.0465404
His4:CG31611	9.74e-14	2.55e-12	-0.93414	0.125482	5.35747	0.280929	0.00069661	0.0465404	0.0298134	0.0465404
AdSL	9.86e-14	2.58e-12	0.44017	0.0591405	8.5111	0.054369	0.000216454	0.00146443	0.0102763	0.0102763
lush	1.01e-13	2.63e-12	-1.08659	0.146048	4.79288	0.380179	0.00921781	0.054772	0.0365174	0.054772
mei-P26	1.02e-13	2.66e-12	0.45243	0.0608273	9.05094	0.0574579	0.000110649	0.00168504	0.0109892	0.0109892
Xport-A	1.03e-13	2.69e-12	-0.883295	0.118778	4.86628	0.234245	0.00665484	0.0169522	0.0356695	0.0356695
Cyp12c1	1.08e-13	2.8e-12	1.12685	0.151648	4.99738	0.409026	0.00876322	0.0602278	0.0341221	0.0602278
Gbp3	1.1e-13	2.83e-12	1.65268	0.22247	5.682	0.879896	0.00606167	0.142417	0.0260653	0.142417
Irc	1.19e-13	3.07e-12	0.853845	0.115106	6.96938	0.234967	0.000972405	0.0387759	0.0131504	0.0387759
lncRNA:CR46035	1.28e-13	3.28e-12	-1.007	0.13592	4.35914	0.306653	0.0138537	0.0192528	0.0415691	0.0415691
trv	1.3e-13	3.33e-12	-0.797893	0.107732	5.21003	0.201183	0.00324656	0.0270649	0.0315721	0.0315721
Sccpdh2	1.3e-13	3.33e-12	0.455492	0.0614993	7.55592	0.0653608	0.000454678	0.00920036	0.0108918	0.0108918
Shmt	1.34e-13	3.42e-12	0.526702	0.0711526	9.50423	0.0894658	9.68e-05	0.0150913	0.0122787	0.0150913
CG15202	1.39e-13	3.54e-12	-0.883544	0.119436	4.93332	0.224022	0.00791095	0.00431877	0.0348842	0.0348842
CG31808	1.51e-13	3.86e-12	-0.487781	0.0660424	7.14374	0.0734952	0.00080869	0.00865685	0.0122761	0.0122761
RhoGEF64C	1.63e-13	4.15e-12	0.694865	0.094208	5.90162	0.15438	0.00294101	0.0220261	0.0236845	0.0236845
Obp56g	1.65e-13	4.18e-12	-1.2065	0.1636	4.96378	0.469989	0.00995498	0.0703395	0.034523	0.0703395
GstZ2	1.78e-13	4.49e-12	0.919804	0.124894	4.712	0.261554	0.00935236	0.0245455	0.0374432	0.0374432
Est-Q	1.79e-13	4.52e-12	1.09986	0.149364	5.4051	0.390759	0.00491005	0.0620185	0.0292506	0.0620185
CG30008	2.1e-13	5.28e-12	-1.14584	0.156057	7.52898	0.424495	0.000557001	0.0725041	0.0109594	0.0725041
Clect27	2.19e-13	5.5e-12	-0.58529	0.0797754	6.85509	0.110783	0.00125973	0.0178326	0.013938	0.0178326
para	2.31e-13	5.79e-12	-0.918857	0.125364	6.73963	0.273126	0.000686281	0.0464625	0.0149426	0.0464625
Teh2	2.34e-13	5.84e-12	-0.724561	0.0988765	5.75591	0.159771	0.00408228	0.0141693	0.0252474	0.0252474
CG13659	2.33e-13	5.84e-12	1.18289	0.161416	4.5924	0.45267	0.0126202	0.0655455	0.0388112	0.0655455
Gbp2	2.39e-13	5.95e-12	1.52621	0.208354	6.81326	0.753666	0.00171876	0.128516	0.0142799	0.128516
CG32486	2.39e-13	5.95e-12	-0.449277	0.0613371	7.60977	0.0604668	0.000513358	0.0054453	0.0107734	0.0107734
CG14933	2.42e-13	6.01e-12	0.760212	0.103811	6.22661	0.187006	0.00188215	0.0304477	0.0204686	0.0304477
yellow-k	2.59e-13	6.42e-12	1.34778	0.184274	4.89708	0.588023	0.00916494	0.0927055	0.0353102	0.0927055
CG14277	2.65e-13	6.55e-12	-1.18547	0.162147	5.55085	0.454979	0.00564702	0.0732283	0.0275527	0.0732283
IA-2	2.68e-13	6.59e-12	-0.866258	0.118506	8.11404	0.242957	0.000257411	0.0418739	0.0102505	0.0418739
CG43402	3.85e-13	9.47e-12	1.83923	0.253313	5.38989	1.09758	0.016013	0.17649	0.02943	0.17649
tow	3.93e-13	9.65e-12	-0.904406	0.12461	4.8024	0.247571	0.0101753	0.0167683	0.036408	0.036408
Octbeta2R	4.02e-13	9.84e-12	-0.66262	0.0913338	6.23182	0.142496	0.00181891	0.0232067	0.0204183	0.0232067
SCOT	4.33e-13	1.06e-11	0.442978	0.0611439	7.67733	0.0628605	0.000561591	0.00971608	0.0106541	0.0106541
CG33521	4.6e-13	1.12e-11	-0.56438	0.0779892	7.83155	0.103459	0.000391652	0.0178553	0.0104699	0.0178553
CG2082	4.64e-13	1.13e-11	-0.488538	0.0675208	7.05916	0.0732156	0.00100436	0.00793207	0.0126728	0.0126728
UGP	4.69e-13	1.14e-11	0.453899	0.0627445	9.33787	0.0626415	8.74e-05	0.00701093	0.0117232	0.0117232
Irp-1B	5.11e-13	1.24e-11	0.428032	0.0592652	8.65274	0.0565493	0.000149893	0.00709105	0.0103872	0.0103872
CG5793	5.4e-13	1.31e-11	0.685455	0.0950051	7.42198	0.152757	0.00068135	0.0263966	0.0112563	0.0263966
nAChRalpha7	5.5e-13	1.33e-11	-0.699141	0.0969358	6.01477	0.158935	0.00219586	0.0259938	0.0225207	0.0259938
CG9631	5.54e-13	1.34e-11	0.798809	0.110772	5.23818	0.192056	0.00557663	0.0142556	0.0312349	0.0312349
snRNA:U11	5.6e-13	1.35e-11	-1.04269	0.144618	5.46642	0.353549	0.00484483	0.0578985	0.0285313	0.0578985
nAChRalpha6	5.82e-13	1.4e-11	-1.16933	0.162305	6.27709	0.444754	0.00345517	0.0755734	0.0199643	0.0755734
CG18233	5.84e-13	1.4e-11	1.71413	0.237935	2.86451	0.892892	0.0915264	0.0091824	0.0783122	0.0783122
CG6426	5.88e-13	1.41e-11	0.6596	0.091571	6.53293	0.141525	0.00168567	0.0234701	0.017116	0.0234701
lncRNA:CR43250	6.19e-13	1.48e-11	-1.81554	0.252293	4.10738	1.07256	0.0262078	0.164748	0.0449059	0.164748
CG7299	6.35e-13	1.51e-11	-1.66066	0.230881	4.13663	0.897504	0.0368386	0.123079	0.0444888	0.123079
Ggamma30A	6.37e-13	1.51e-11	-0.761862	0.105928	8.47646	0.188902	0.000549195	0.0331129	0.0102564	0.0331129
wupA	6.38e-13	1.51e-11	-0.552812	0.0768631	8.79893	0.0994583	0.000149265	0.0175746	0.0105555	0.0175746
Cad99C	7.16e-13	1.69e-11	0.855836	0.119259	6.92554	0.23855	0.000998201	0.04167	0.0134257	0.04167
Mur2B	7.18e-13	1.69e-11	1.23899	0.172658	9.0684	0.499962	0.000143075	0.0892895	0.0110263	0.0892895
CecA1	7.2e-13	1.7e-11	3.33311	0.464513	4.64809	3.61836	0.029057	0.618259	0.038173	0.618259
SLC22A	7.22e-13	1.7e-11	0.858388	0.119632	5.11242	0.239986	0.00651096	0.0364245	0.0327434	0.0364245
Ubr3	7.41e-13	1.74e-11	0.433563	0.0604554	8.97119	0.0588556	0.000132896	0.00821534	0.0108317	0.0108317
lncRNA:CR44720	7.6e-13	1.78e-11	-2.48641	0.346868	2.04409	1.91539	0.236139	0.0161113	0.124814	0.124814
MtnB	7.64e-13	1.79e-11	1.11981	0.156238	4.12773	0.408569	0.0272832	0.0459476	0.0446147	0.0459476
CG4945	8.05e-13	1.88e-11	-0.694262	0.0969603	5.76866	0.148111	0.00309593	0.0152265	0.025108	0.025108
CG4741	8.36e-13	1.94e-11	-1.10839	0.154908	4.52552	0.400497	0.0139424	0.0580468	0.0395839	0.0580468
Gale	8.71e-13	2.02e-11	0.702686	0.0982845	8.16798	0.161009	0.000341888	0.0286377	0.0102252	0.0286377
CG32767	8.83e-13	2.05e-11	0.431339	0.0603478	8.93858	0.0563513	0.000152814	0.00601758	0.0107727	0.0107727
GluRIIA	9.67e-13	2.24e-11	-0.875695	0.122731	4.77715	0.23688	0.0084909	0.0220249	0.036698	0.036698
Tep1	1.09e-12	2.52e-11	2.59665	0.364782	1.78965	2.11039	0.253764	0.0448835	0.145433	0.145433
alpha-Est5	1.11e-12	2.55e-11	0.477349	0.0670756	7.09684	0.0744028	0.00100705	0.0124774	0.0124904	0.0124904
SmydA-4	1.16e-12	2.66e-11	-0.844306	0.118746	5.02103	0.232871	0.00694132	0.0353607	0.0338393	0.0353607
CG17739	1.18e-12	2.71e-11	-0.491987	0.069219	6.92407	0.0790803	0.000938273	0.0134348	0.0134356	0.0134356
Alk	1.18e-12	2.71e-11	-0.648735	0.0912796	6.02396	0.135511	0.00256765	0.0202374	0.0224282	0.0224282
CG42747	1.2e-12	2.73e-11	0.806628	0.113518	5.12199	0.20086	0.00603061	0.0197212	0.0326285	0.0326285
CG7781	1.2e-12	2.75e-11	-0.540115	0.0760201	6.63158	0.0871853	0.00130392	0.00708279	0.0160332	0.0160332
toe	1.21e-12	2.76e-11	-1.03111	0.145144	4.07771	0.316923	0.0178616	0.0117991	0.0453389	0.0453389
tsl	1.37e-12	3.1e-11	0.678294	0.0957042	5.97542	0.148952	0.00455764	0.0212648	0.0229202	0.0229202
CG16926	1.37e-12	3.1e-11	2.03951	0.287771	7.00019	1.36029	0.00180644	0.24663	0.0129779	0.24663
CG34040	1.37e-12	3.11e-11	3.92648	0.554067	2.59684	5.04195	0.102487	0.818485	0.0906885	0.818485
CG32425	1.38e-12	3.11e-11	0.440332	0.0621402	9.21721	0.0545804	0.000202649	0.00166797	0.0113816	0.0113816
Orcokinin	1.49e-12	3.37e-11	-0.940269	0.132898	5.20095	0.289289	0.00674713	0.0462386	0.0316809	0.0462386
Larp4B	1.5e-12	3.37e-11	0.491764	0.0695128	8.98883	0.0791324	0.000149212	0.0143469	0.0108649	0.0143469
Pal2	1.58e-12	3.56e-11	-0.647325	0.0915995	6.16303	0.137164	0.00221325	0.0229581	0.0210683	0.0229581
Nepl12	1.61e-12	3.61e-11	1.60556	0.227274	4.18925	0.843912	0.020208	0.134752	0.0437606	0.134752
a10	1.62e-12	3.63e-11	-1.04006	0.147239	6.20795	0.354139	0.00229187	0.0627464	0.0206453	0.0627464
lncRNA:CR44651	1.63e-12	3.64e-11	-1.74697	0.247345	2.67133	0.992525	0.0965301	0.0796782	0.0870088	0.0870088
Hr3	1.67e-12	3.73e-11	0.654235	0.0926773	6.06462	0.132401	0.00374427	0.0134898	0.022023	0.022023
Mrtf	1.96e-12	4.37e-11	0.426392	0.0605931	7.70551	0.0567758	0.00040199	0.00750828	0.0106126	0.0106126
Hf	2.17e-12	4.82e-11	0.775384	0.110405	6.02046	0.197213	0.0026239	0.0339438	0.0224635	0.0339438
CG7322	2.21e-12	4.88e-11	0.88136	0.125535	7.08218	0.254832	0.00102388	0.0462531	0.0125602	0.0462531
meng	2.23e-12	4.92e-11	-0.93551	0.133273	4.44129	0.263116	0.0127106	0.0141637	0.0405746	0.0405746
Pld	2.35e-12	5.19e-11	0.444447	0.063385	8.26674	0.0648299	0.000292528	0.0117605	0.0102041	0.0117605
CG13024	2.36e-12	5.2e-11	0.975908	0.139193	4.28591	0.294182	0.0156366	0.0222444	0.0424878	0.0424878
CG10512	2.37e-12	5.21e-11	0.707113	0.100863	6.6621	0.164111	0.00138972	0.02913	0.0157131	0.02913
Zw	2.42e-12	5.31e-11	0.488851	0.0697581	7.45681	0.0784464	0.000689112	0.0139095	0.0111546	0.0139095
CG45061	2.51e-12	5.5e-11	1.51255	0.215999	3.12426	0.751188	0.062034	0.0779326	0.0683335	0.0779326
CG10205	2.54e-12	5.55e-11	-0.717983	0.102554	5.51245	0.163633	0.00355615	0.0217901	0.027996	0.027996
CG12224	2.85e-12	6.21e-11	0.860023	0.123123	4.92637	0.242068	0.0105117	0.0338709	0.0349662	0.0349662
CG32354	2.86e-12	6.23e-11	-0.896291	0.128329	4.59381	0.250841	0.0106102	0.0243138	0.0387949	0.0387949
teq	2.89e-12	6.27e-11	0.899127	0.128757	7.7097	0.265694	0.00112102	0.048614	0.0106067	0.048614
CG31075	3.05e-12	6.62e-11	0.413879	0.0593351	8.60272	0.0491197	0.000219111	0.00242382	0.0103429	0.0103429
NimB2	3.28e-12	7.1e-11	0.938063	0.134679	6.81744	0.289458	0.00123839	0.0531768	0.0142445	0.0531768
Rbp9	3.44e-12	7.44e-11	-0.515218	0.0740428	7.37312	0.0873471	0.00064165	0.0158053	0.0114077	0.0158053
CG15530	3.64e-12	7.86e-11	-1.18451	0.170425	3.62579	0.404435	0.0334677	-0.00950705	0.053666	0.053666
CG13813	3.72e-12	8.02e-11	0.895519	0.128902	4.61684	0.23569	0.0113169	0.00735548	0.0385307	0.0385307
CG13309	3.8e-12	8.17e-11	0.785031	0.113045	7.19882	0.202927	0.000746198	0.0375915	0.0120415	0.0375915
CG14186	4.03e-12	8.64e-11	-0.800745	0.115444	5.06298	0.202883	0.0066451	0.0241686	0.0333366	0.0333366
CG16727	4.24e-12	9.09e-11	1.58132	0.228225	5.99255	0.824028	0.00363379	0.152626	0.0227456	0.152626
CG15120	4.35e-12	9.29e-11	1.35278	0.195337	3.28895	0.566411	0.0515749	0.022472	0.0628953	0.0628953
CG1773	4.55e-12	9.71e-11	1.87707	0.271298	3.24378	1.16166	0.074637	0.146171	0.064324	0.146171
Frq1	4.73e-12	1.01e-10	-0.878258	0.127037	6.16747	0.254379	0.00215897	0.0462564	0.0210261	0.0462564
CG31324	4.76e-12	1.01e-10	0.596528	0.0862975	6.26824	0.112243	0.00228653	0.0144267	0.0200552	0.0200552
Nipped-B	4.92e-12	1.04e-10	0.421928	0.0610787	9.09109	0.0561902	0.000115889	0.00828629	0.0110759	0.0110759
2022-12-01	5.04e-12	1.07e-10	1.30798	0.189438	10.5572	0.564457	3.5e-05	0.107625	0.0187983	0.107625
lncRNA:noe	5.11e-12	1.08e-10	-1.01252	0.146691	8.52691	0.338288	0.000229155	0.0643255	0.0102864	0.0643255
CG30148	5.13e-12	1.08e-10	1.46819	0.212719	3.96079	0.711293	0.0373283	0.0984202	0.0471537	0.0984202
Dhc36C	5.22e-12	1.1e-10	0.724989	0.105081	5.5639	0.173463	0.00406682	0.0290591	0.0274029	0.0290591
phu	5.26e-12	1.11e-10	-1.75884	0.254966	3.66758	1.02098	0.0424156	0.152607	0.0527203	0.152607
CG40485	5.36e-12	1.12e-10	-0.962212	0.139535	5.85471	0.305605	0.00460899	0.0538013	0.0241801	0.0538013
Gycalpha99B	5.35e-12	1.12e-10	-0.720466	0.104476	5.67797	0.171334	0.00364476	0.0291013	0.0261103	0.0291013
CG32023	5.54e-12	1.16e-10	0.647485	0.0939619	5.90276	0.138112	0.00281395	0.0233384	0.0236726	0.0236726
sif	5.81e-12	1.21e-10	-0.757364	0.110015	7.77461	0.189446	0.000764931	0.0355451	0.0105269	0.0355451
Gyc76C	5.81e-12	1.21e-10	0.46262	0.0672009	8.48707	0.0706845	0.00239899	0.0111489	0.0102622	0.0111489
CG5646	5.79e-12	1.21e-10	-0.667054	0.0968905	5.79227	0.142285	0.00331233	0.0197124	0.024851	0.024851
7B2	5.96e-12	1.24e-10	-0.799626	0.116214	6.43213	0.211216	0.00181566	0.0387014	0.0182609	0.0387014
kuz	6.06e-12	1.26e-10	0.406332	0.0590756	8.39737	0.0541143	0.000247438	0.00974663	0.0102223	0.0102223
nAChRalpha5	6.38e-12	1.32e-10	-0.71826	0.104537	5.45516	0.157576	0.00412072	0.0144434	0.0286629	0.0286629
MRP	6.39e-12	1.32e-10	0.425846	0.0619812	9.11444	0.059935	0.000125173	0.0113998	0.0111287	0.0113998
LysP	6.46e-12	1.33e-10	-0.963113	0.14021	7.22704	0.306593	0.000817121	0.0581596	0.0119281	0.0581596
CG10560	6.51e-12	1.34e-10	-0.655983	0.0955141	6.40474	0.142239	0.00159267	0.0257762	0.0185715	0.0257762
CG14406	6.64e-12	1.36e-10	1.38332	0.201499	3.99733	0.632618	0.021722	0.100084	0.0465665	0.100084
Lip3	6.78e-12	1.39e-10	2.20944	0.321974	3.63941	1.61407	0.0455333	0.265468	0.0533527	0.265468
Tsp42Ej	6.85e-12	1.4e-10	-0.764067	0.111369	6.77136	0.193044	0.00123473	0.0359746	0.014648	0.0359746
Tsp42Eo	6.89e-12	1.41e-10	-1.12337	0.163761	3.83338	0.405194	0.0310853	0.0360376	0.0493678	0.0493678
spab	6.99e-12	1.43e-10	-0.830215	0.121062	4.88419	0.214116	0.00850708	0.0202435	0.0354609	0.0354609
CG13905	7.24e-12	1.47e-10	1.59806	0.233195	5.97489	0.844799	0.00417069	0.158969	0.0229256	0.158969
Dgat2	7.4e-12	1.5e-10	1.47575	0.215447	3.84353	0.72055	0.031709	0.107543	0.0491811	0.107543
asRNA:CR45955	7.52e-12	1.53e-10	2.01604	0.294426	2.7663	1.21786	0.177473	-0.057144	0.0825865	0.0825865
CG12158	7.59e-12	1.54e-10	-1.12515	0.164347	5.7864	0.418924	0.00389925	0.0771306	0.0249147	0.0771306
CG11368	7.86e-12	1.59e-10	-0.94064	0.137497	5.55799	0.292871	0.00443324	0.0522831	0.0274708	0.0522831
Appl	7.95e-12	1.6e-10	-0.492166	0.0719598	7.15285	0.0801845	0.000665537	0.0148691	0.0122361	0.0148691
Obp69a	8.86e-12	1.78e-10	-1.13044	0.165657	4.71821	0.42336	0.0107834	0.0715436	0.0373723	0.0715436
nAChRalpha3	8.87e-12	1.78e-10	-0.954883	0.139937	4.72237	0.302079	0.0083577	0.0503893	0.0373248	0.0503893
Npc1b	8.91e-12	1.79e-10	3.3851	0.496128	5.09145	3.79645	0.0202261	0.718204	0.0329952	0.718204
ab	9.24e-12	1.85e-10	-0.890303	0.130582	5.29769	0.262679	0.00548895	0.0456663	0.030524	0.0456663
CG7378	9.52e-12	1.9e-10	-0.425405	0.0624342	7.5896	0.0599862	0.00060119	0.0110929	0.0108151	0.0110929
jdp	9.55e-12	1.91e-10	-0.533989	0.0783773	6.56875	0.0939421	0.00171305	0.0160799	0.016716	0.016716
CG45076	9.62e-12	1.92e-10	-0.490869	0.0720579	8.19954	0.0798751	0.000419821	0.0151572	0.010215	0.0151572
nrv3	1.02e-11	2.02e-10	-0.874201	0.128477	8.06228	0.253443	0.000663801	0.0488553	0.0102845	0.0488553
CG34376	1.05e-11	2.08e-10	0.594235	0.0873898	6.71616	0.117132	0.00132374	0.0215872	0.0151687	0.0215872
CG42541	1.09e-11	2.17e-10	-0.94436	0.13901	5.30901	0.295924	0.00503736	0.052934	0.0303891	0.052934
Os-C	1.1e-11	2.18e-10	-0.862414	0.126962	6.18375	0.246805	0.00215867	0.0461991	0.0208721	0.0461991
AGBE	1.11e-11	2.19e-10	0.415428	0.0611687	9.10809	0.048718	0.000110631	0.001705	0.0111142	0.0111142
Cyp4s3	1.17e-11	2.31e-10	1.01548	0.149698	6.24747	0.342354	0.0024643	0.0647644	0.0202647	0.0647644
bond	1.2e-11	2.36e-10	0.621355	0.0916377	6.94757	0.128197	0.00104379	0.0241486	0.013283	0.0241486
CG17108	1.25e-11	2.45e-10	0.736723	0.108746	9.36566	0.180278	8.46e-05	0.0353926	0.011809	0.0353926
CG15201	1.29e-11	2.53e-10	-0.855723	0.126406	6.17768	0.243286	0.00241219	0.0455236	0.0209294	0.0455236
CG31688	1.51e-11	2.97e-10	0.401595	0.0595258	8.1191	0.0526445	0.000382325	0.00914302	0.0102476	0.0102476
Prat2	1.52e-11	2.97e-10	1.69325	0.250992	6.8505	0.953749	0.00177807	0.187213	0.0139742	0.187213
CG9747	1.54e-11	3.01e-10	0.931575	0.138135	7.77437	0.288722	0.00047114	0.0567731	0.0105272	0.0567731
CG3638	1.69e-11	3.29e-10	0.48839	0.0725593	8.36293	0.0794109	0.000217314	0.0155772	0.0102128	0.0155772
Cyp4ac3	1.69e-11	3.29e-10	-1.03855	0.154302	4.55884	0.359094	0.0111779	0.0602492	0.0391978	0.0602492
PCB	1.71e-11	3.32e-10	0.52038	0.0773332	9.14381	0.0901636	0.000110142	0.0178311	0.0111975	0.0178311
Got2	1.81e-11	3.51e-10	0.446876	0.0664934	9.72897	0.057803	6.41e-05	0.00360983	0.0132	0.0132
List	1.93e-11	3.73e-10	-0.718778	0.107096	5.40099	0.155909	0.0051094	0.0113978	0.029299	0.029299
CG17570	1.94e-11	3.75e-10	-1.49131	0.222241	3.06009	0.728297	0.0775424	0.0563808	0.0706309	0.0706309
CAP	2e-11	3.86e-10	-0.40996	0.0611326	8.03355	0.0560288	0.000645961	0.0105656	0.0103076	0.0105656
AttD	2.03e-11	3.91e-10	2.72861	0.407015	2.12362	2.48234	0.194251	0.302732	0.11907	0.302732
inv	2.08e-11	3.99e-10	-1.16843	0.174377	3.77702	0.430793	0.0407807	0.0235196	0.0504414	0.0504414
cDIP	2.12e-11	4.08e-10	0.763774	0.114041	5.12675	0.191857	0.00644466	0.0295931	0.0325713	0.0325713
CG11191	2.21e-11	4.23e-10	-0.850994	0.127174	4.5899	0.213602	0.00967972	0.00802543	0.0388399	0.0388399
Galphao	2.25e-11	4.3e-10	0.406187	0.0607254	7.66919	0.0520918	0.000395762	0.00740898	0.010667	0.010667
prom	2.26e-11	4.31e-10	-0.695916	0.104047	5.51446	0.142308	0.00450457	0.00674492	0.0279727	0.0279727
Asph	2.57e-11	4.9e-10	-0.468223	0.0702049	7.44416	0.0732328	0.000772501	0.0140137	0.0111909	0.0140137
CG43367	2.63e-11	5.02e-10	0.397591	0.0596473	8.00543	0.0504377	0.0003432	0.00771471	0.0103302	0.0103302
CadN	2.66e-11	5.06e-10	-0.566617	0.0850244	6.25142	0.10026	0.0014622	0.0125072	0.0202252	0.0202252
Nipped-A	2.67e-11	5.07e-10	0.576448	0.0865072	8.61697	0.111035	0.00020172	0.0222488	0.0103549	0.0222488
Spn42Da	2.82e-11	5.34e-10	0.415434	0.0624175	7.49375	0.0501712	0.000635706	0.00277695	0.0110521	0.0110521
bru3	3.04e-11	5.74e-10	-1.00594	0.151393	5.60394	0.338487	0.00287821	0.0658809	0.0269455	0.0658809
Pxt	3.04e-11	5.74e-10	0.473296	0.071231	10.0927	0.0739039	4.6e-05	0.0140454	0.0151756	0.0151756
phyl	3.04e-11	5.74e-10	-1.10041	0.165614	4.35177	0.405049	0.0149334	0.0673508	0.0416601	0.0673508
psd	3.38e-11	6.37e-10	1.12632	0.169911	8.55498	0.424714	0.00027251	0.0863364	0.0103058	0.0863364
l	3.63e-11	6.82e-10	-2.03629	0.30766	2.44505	1.29899	0.185162	-0.000214571	0.0988029	0.0988029
CG5973	3.69e-11	6.92e-10	0.510064	0.0770941	7.94429	0.0871638	0.00035825	0.0174723	0.0103773	0.0174723
CG13841	3.74e-11	7.01e-10	-0.936714	0.141629	4.41423	0.269848	0.019278	0.0143247	0.0408986	0.0408986
lncRNA:CR31451	3.75e-11	7.01e-10	-0.896479	0.135549	8.12282	0.269293	0.000347288	0.054773	0.0102456	0.054773
SclB	3.78e-11	7.05e-10	-0.552576	0.0835638	6.38965	0.100782	0.00220692	0.017051	0.0187418	0.0187418
Smyd5	3.84e-11	7.16e-10	-0.446082	0.0674852	7.19655	0.0666905	0.000763614	0.0128991	0.0120509	0.0128991
CG32549	3.86e-11	7.18e-10	0.390961	0.0591514	8.47254	0.0488655	0.000242332	0.00765455	0.0102543	0.0102543
lncRNA:CR45052	3.9e-11	7.25e-10	1.11942	0.169408	3.98421	0.420026	0.0217473	0.0643498	0.046775	0.0643498
eyg	4.11e-11	7.62e-10	-1.01491	0.153771	3.8235	0.343958	0.0213846	0.0479568	0.0495515	0.0495515
Mal-A1	4.23e-11	7.83e-10	3.16675	0.480104	7.19448	3.36362	0.00251694	0.688982	0.0120594	0.688982
CG3609	4.29e-11	7.94e-10	0.548983	0.0832608	8.2805	0.101102	0.000312051	0.020485	0.0102037	0.020485
CG18234	4.52e-11	8.35e-10	1.07996	0.163979	3.68743	0.391416	0.026972	0.0536949	0.0522863	0.0536949
CG12116	4.54e-11	8.37e-10	1.15269	0.175039	8.21382	0.445934	0.000322034	0.091594	0.0102115	0.091594
CG10947	4.77e-11	8.78e-10	-0.721091	0.109621	5.7782	0.174584	0.00319779	0.0328524	0.025004	0.0328524
Prp8	4.88e-11	8.98e-10	0.418119	0.0635975	9.44001	0.0557421	8.17e-05	0.00878757	0.0120522	0.0120522
Kaz1-ORFB	5.06e-11	9.29e-10	0.776698	0.118234	5.83493	0.202651	0.00495388	0.0369839	0.0243913	0.0369839
Reg-2	5.29e-11	9.69e-10	1.27197	0.193822	5.69941	0.543703	0.0040608	0.10864	0.0258712	0.10864
CG12605	5.42e-11	9.92e-10	-0.749934	0.114338	4.95461	0.188019	0.00458752	0.0335136	0.0346321	0.0346321
lbm	5.6e-11	1.02e-09	-0.741919	0.1132	5.13536	0.164807	0.00597467	0.0101802	0.032468	0.032468
Egfr	5.6e-11	1.02e-09	0.826962	0.126175	7.09356	0.229927	0.000932625	0.0468277	0.0125059	0.0468277
CG17027	5.82e-11	1.06e-09	-0.646305	0.0986965	5.7541	0.136858	0.00395578	0.021275	0.0252672	0.0252672
zip	5.86e-11	1.06e-09	0.402521	0.0614784	9.16039	0.0531628	0.000101251	0.00977098	0.0112375	0.0112375
CanB	5.86e-11	1.06e-09	-0.708663	0.108238	5.33173	0.160792	0.00502789	0.0211818	0.0301188	0.0301188
bigmax	5.96e-11	1.08e-09	-0.477549	0.0729658	6.76719	0.0751037	0.00128607	0.0129121	0.014686	0.014686
Tsp42Eh	6.43e-11	1.16e-09	-0.740421	0.113329	5.13262	0.16603	0.00602961	0.0121364	0.0325009	0.0325009
Sp1	6.53e-11	1.18e-09	-0.629802	0.0964316	5.80958	0.133538	0.00293013	0.024967	0.0246637	0.024967
CanA1	6.61e-11	1.19e-09	-0.680578	0.104236	5.46137	0.154234	0.00400498	0.0266962	0.0285903	0.0285903
Tsp	6.81e-11	1.23e-09	-0.600527	0.0920372	5.99873	0.106873	0.00272971	0.00664016	0.0226829	0.0226829
CG5270	6.95e-11	1.25e-09	0.644649	0.0988457	7.8503	0.139985	0.000433899	0.0288775	0.0104531	0.0288775
CG40498	7.26e-11	1.3e-09	-0.706737	0.108474	5.36383	0.156784	0.00556162	0.0170572	0.0297381	0.0297381
Hipk	7.37e-11	1.32e-09	0.567731	0.0871705	7.94134	0.108629	0.000316934	0.0224792	0.0103795	0.0224792
Pka-C3	7.37e-11	1.32e-09	-0.489631	0.0751788	7.1253	0.0807973	0.000674058	0.0162815	0.0123587	0.0162815
Gfat2	7.39e-11	1.32e-09	0.388482	0.0596509	8.06801	0.0497662	0.00039442	0.00907288	0.0102803	0.0102803
His1:CG33813	8.08e-11	1.44e-09	-0.651263	0.100208	6.76563	0.143062	0.00234753	0.0277776	0.0147002	0.0277776
His1:CG31617	8.08e-11	1.44e-09	-0.651263	0.100208	6.76563	0.143062	0.00234753	0.0277776	0.0147002	0.0277776
CG8800	8.14e-11	1.45e-09	-0.951196	0.146385	4.03699	0.304372	0.0183353	0.045042	0.0459503	0.0459503
CG42521	8.16e-11	1.45e-09	-0.810318	0.12471	6.45948	0.221493	0.00169072	0.0449668	0.0179494	0.0449668
CG15203	8.28e-11	1.47e-09	0.684909	0.105444	5.53924	0.150542	0.00566861	0.0191977	0.0276864	0.0276864
Prosap	8.36e-11	1.48e-09	0.385888	0.0594216	8.70803	0.047075	0.000148892	0.00696072	0.0104439	0.0104439
dysc	8.41e-11	1.49e-09	-0.674641	0.1039	6.1809	0.153571	0.0024009	0.029985	0.0208991	0.029985
CG42524	8.53e-11	1.51e-09	-1.66074	0.255856	4.07825	0.930734	0.0289527	0.167435	0.0453309	0.167435
Obp99b	8.87e-11	1.56e-09	2.36749	0.36507	3.52871	1.89212	0.0622082	0.33762	0.0560466	0.33762
brk	8.89e-11	1.56e-09	0.816399	0.125895	5.24624	0.225001	0.00580082	0.0417482	0.0311385	0.0417482
dtn	8.93e-11	1.57e-09	0.384623	0.0593191	8.11857	0.0419007	0.000308316	0.00140197	0.0102479	0.0102479
RSG7	9.43e-11	1.66e-09	-0.732097	0.113052	5.07583	0.16192	0.00515977	0.0121627	0.0331826	0.0331826
CG3746	1.03e-10	1.8e-09	-0.996392	0.154168	4.41165	0.335584	0.0153489	0.0559549	0.0409297	0.0559549
CG3505	1.06e-10	1.85e-09	0.685671	0.106168	5.42628	0.149839	0.00481351	0.0189658	0.0290015	0.0290015
CG34327	1.15e-10	2.01e-09	1.46842	0.227809	4.62081	0.729607	0.0142161	0.141474	0.0384852	0.141474
hui	1.22e-10	2.13e-09	-0.791518	0.122977	4.85305	0.19945	0.009547	0.021898	0.0358231	0.0358231
CG1673	1.25e-10	2.18e-09	0.513185	0.079774	7.85236	0.0891811	0.000396964	0.0186947	0.0104513	0.0186947
CG9313	1.27e-10	2.21e-09	-1.20299	0.18707	3.27307	0.469217	0.0415933	0.040391	0.0633924	0.0633924
Obp28a	1.33e-10	2.32e-09	-0.947857	0.147569	5.66184	0.304418	0.00395668	0.0613729	0.0262911	0.0613729
Neurochondrin	1.34e-10	2.32e-09	-0.53145	0.0827426	6.75053	0.0957008	0.00115674	0.0193823	0.0148399	0.0193823
CG13607	1.35e-10	2.34e-09	1.76644	0.275092	6.17643	1.05738	0.00337004	0.223657	0.0209412	0.223657
asRNA:CR45046	1.38e-10	2.38e-09	3.27239	0.509831	3.45669	3.62941	0.13351	0.646273	0.0579789	0.646273
lncRNA:CR46194	1.4e-10	2.41e-09	-0.608913	0.0948997	5.99809	0.125682	0.00384675	0.0231711	0.0226894	0.0231711
CG43112	1.45e-10	2.5e-09	-1.05986	0.165338	5.42736	0.38091	0.00573372	0.0762766	0.0289887	0.0762766
Obp59a	1.45e-10	2.5e-09	-1.1432	0.178337	4.24499	0.443166	0.0174133	0.0779994	0.0430173	0.0779994
tal-AA	1.58e-10	2.7e-09	0.796052	0.124433	5.21704	0.215055	0.0015968	0.0448537	0.031488	0.0448537
tal-1A	1.58e-10	2.7e-09	0.796052	0.124433	5.21704	0.215055	0.0015968	0.0448537	0.031488	0.0448537
tal-2A	1.58e-10	2.7e-09	0.796052	0.124433	5.21704	0.215055	0.0015968	0.0448537	0.031488	0.0448537
tal-3A	1.58e-10	2.7e-09	0.796052	0.124433	5.21704	0.215055	0.0015968	0.0448537	0.031488	0.0448537
CG8343	1.58e-10	2.7e-09	-1.16192	0.181619	7.36969	0.45816	0.000816134	0.0981407	0.0114187	0.0981407
CG31675	1.62e-10	2.76e-09	-0.821439	0.128473	4.56533	0.217371	0.0103933	0.026286	0.0391228	0.0391228
CG43897	1.64e-10	2.79e-09	-0.475959	0.074465	9.48089	0.0769055	9.73e-05	0.0165378	0.0121946	0.0165378
CG4577	1.69e-10	2.87e-09	-0.71238	0.111529	6.27394	0.172328	0.00201872	0.0352972	0.0199969	0.0352972
CG31664	1.69e-10	2.88e-09	1.47341	0.2307	2.88665	0.633951	0.0822782	-0.0362138	0.0773886	0.0773886
CG11353	1.71e-10	2.9e-09	0.841104	0.131721	5.41983	0.240262	0.00450471	0.0475463	0.0290772	0.0475463
Ork1	1.73e-10	2.92e-09	0.464063	0.0726937	8.70811	0.0731449	0.000190973	0.0156622	0.010444	0.0156622
CG3088	1.74e-10	2.95e-09	-1.15889	0.181577	6.97815	0.4562	0.00102408	0.0978871	0.0130996	0.0978871
CG13318	1.79e-10	3.01e-09	-0.865014	0.13561	4.64446	0.254223	0.00975779	0.0454126	0.0382145	0.0454126
Nepl15	1.87e-10	3.15e-09	0.535147	0.0839901	6.35191	0.0907222	0.00200044	0.0118793	0.0191626	0.0191626
CG11835	1.89e-10	3.18e-09	-0.679469	0.106671	5.37367	0.14799	0.00451453	0.019771	0.0296217	0.0296217
Pak3	1.89e-10	3.18e-09	0.376137	0.0590512	8.40296	0.0427326	0.000236944	0.00432526	0.0102242	0.0102242
CG10543	1.92e-10	3.21e-09	0.376957	0.059196	8.14232	0.043734	0.000276589	0.0052019	0.0102359	0.0102359
Sh	1.93e-10	3.23e-09	-0.899984	0.141353	6.60297	0.275394	0.000855392	0.0590867	0.0163406	0.0590867
VAChT	1.93e-10	3.23e-09	-0.595809	0.0935771	5.91931	0.115723	0.00277048	0.018028	0.0234995	0.0234995
CG4325	1.94e-10	3.24e-09	1.51526	0.238014	4.13761	0.780688	0.0240107	0.145942	0.044475	0.145942
tay	1.97e-10	3.28e-09	0.375761	0.0590472	8.21152	0.0467038	0.00024775	0.00876749	0.010212	0.010212
igl	2.02e-10	3.37e-09	-0.544825	0.085671	6.32406	0.0957982	0.00255147	0.0137761	0.0194671	0.0194671
CG4250	2.03e-10	3.38e-09	0.533955	0.0839695	7.0436	0.0969863	0.000945598	0.020207	0.012751	0.020207
Ufd4	2.12e-10	3.52e-09	0.417569	0.065735	9.65919	0.0584361	7.16e-05	0.0118989	0.0128916	0.0128916
CG11069	2.22e-10	3.69e-09	0.649393	0.102347	5.56214	0.133855	0.00400161	0.0167259	0.0274231	0.0274231
Shark	2.29e-10	3.78e-09	0.378436	0.0596822	7.97996	0.0462004	0.000335926	0.00752042	0.01035	0.01035
Stt3B	2.35e-10	3.89e-09	0.560342	0.0884316	8.39912	0.106959	0.000242655	0.0232178	0.0102229	0.0232178
lncRNA:CR45596	2.59e-10	4.27e-09	-1.11875	0.176969	3.5237	0.42676	0.0369148	0.0570395	0.0561767	0.0570395
miple1	2.61e-10	4.31e-09	-0.625385	0.098951	6.191	0.133369	0.00218059	0.0271933	0.0208039	0.0271933
AANATL3	2.62e-10	4.31e-09	1.82465	0.288716	3.89595	1.13534	0.0353992	0.214671	0.0482461	0.214671
dpr1	2.62e-10	4.31e-09	-0.841964	0.133232	4.4177	0.208411	0.0123951	0.00418555	0.0408569	0.0408569
CG12945	2.79e-10	4.58e-09	0.416755	0.0660468	7.92866	0.0592654	0.000376604	0.01271	0.0103893	0.01271
Drsl5	2.83e-10	4.64e-09	-0.801207	0.127015	6.39122	0.219071	0.00169862	0.0466997	0.0187241	0.0466997
CG11391	2.93e-10	4.79e-09	-0.720791	0.114365	5.52028	0.177363	0.00385133	0.0353868	0.0279054	0.0353868
CG42704	2.93e-10	4.8e-09	-0.913915	0.145013	8.54708	0.285144	0.000223369	0.0628629	0.0103002	0.0628629
SsRbeta	2.94e-10	4.8e-09	0.37733	0.0598762	8.84118	0.0426605	0.000140163	0.00407296	0.0106153	0.0106153
CG13920	3e-10	4.89e-09	-0.579434	0.0919897	5.99029	0.105453	0.00261768	0.0126578	0.0227686	0.0227686
Rdl	3.06e-10	4.99e-09	-1.00352	0.159403	7.04898	0.343949	0.00131332	0.0749149	0.0127238	0.0749149
CG9676	3.08e-10	5.01e-09	-1.19754	0.190246	6.75423	0.489831	0.00152886	0.107051	0.0148054	0.107051
Ten-a	3.09e-10	5.01e-09	-0.68302	0.108514	6.68897	0.159346	0.00120403	0.0341217	0.0154385	0.0341217
nAChRbeta2	3.12e-10	5.06e-09	-0.769557	0.122292	4.99959	0.184592	0.0107704	0.0146156	0.0340957	0.0340957
His1:CG33855	3.16e-10	5.11e-09	-0.744859	0.118408	6.24646	0.189551	0.00353389	0.0385272	0.0202746	0.0385272
His1:CG33858	3.16e-10	5.11e-09	-0.744859	0.118408	6.24646	0.189551	0.00353389	0.0385272	0.0202746	0.0385272
CG1092	3.37e-10	5.44e-09	0.983281	0.156557	4.68764	0.330529	0.0111758	0.0623543	0.0377213	0.0623543
Rbm13	3.44e-10	5.55e-09	-0.392546	0.0625321	8.19478	0.0526895	0.000308319	0.0114225	0.0102163	0.0114225
sbm	3.48e-10	5.6e-09	-0.453185	0.0722115	6.98666	0.0702332	0.000935756	0.0147077	0.0130516	0.0147077
lncRNA:CR42794	3.48e-10	5.6e-09	-1.84432	0.293888	2.39609	1.15783	0.157502	0.0956618	0.101608	0.101608
Gba1a	3.56e-10	5.72e-09	3.12095	0.497603	4.03705	3.33175	0.0625528	0.680272	0.0459493	0.680272
CG31279	3.57e-10	5.73e-09	0.859244	0.137004	5.33341	0.252546	0.0159391	0.0403711	0.0300989	0.0403711
CG14693	3.6e-10	5.76e-09	-0.898463	0.143281	4.51554	0.260038	0.0218884	0.0219826	0.0397001	0.0397001
CG11842	3.62e-10	5.78e-09	0.894558	0.142678	5.38914	0.273765	0.00474523	0.0563258	0.0294389	0.0563258
Cyp6t3	3.64e-10	5.81e-09	-1.09247	0.174272	3.5894	0.381857	0.0365855	0.0254089	0.0545271	0.0545271
CG9119	3.65e-10	5.82e-09	0.825599	0.131711	7.44393	0.233207	0.000653335	0.05139	0.0111916	0.05139
CG43689	3.73e-10	5.94e-09	0.570395	0.0910475	6.07136	0.10754	0.0029126	0.0177766	0.0219564	0.0219564
Scgbeta	3.81e-10	6.06e-09	-0.82449	0.131676	4.5233	0.219758	0.0124058	0.025393	0.0396098	0.0396098
CG12909	3.82e-10	6.06e-09	-0.446688	0.0713407	7.68354	0.0682978	0.000486444	0.0147821	0.0106446	0.0147821
CG15628	3.86e-10	6.12e-09	-0.422903	0.0675592	7.40927	0.0612244	0.000625939	0.0130668	0.0112947	0.0130668
Tret1-1	3.9e-10	6.17e-09	0.667567	0.106673	8.0791	0.152574	0.000421008	0.0337166	0.0102724	0.0337166
CG18231	3.97e-10	6.27e-09	1.91978	0.306903	2.28382	1.11528	0.17416	-0.0530228	0.108409	0.108409
Vha36-3	4.05e-10	6.39e-09	-0.690064	0.110371	5.58896	0.163092	0.00393389	0.0326112	0.0271162	0.0326112
SK	4.08e-10	6.44e-09	-0.800208	0.128016	6.20638	0.219331	0.00169613	0.0474679	0.0206599	0.0474679
Obp19a	4.24e-10	6.68e-09	-0.978743	0.156729	5.30716	0.328248	0.00582203	0.0678696	0.0304112	0.0678696
CG14570	4.27e-10	6.71e-09	-1.14238	0.182958	3.3814	0.420414	0.0403087	0.0306394	0.0601124	0.0601124
hth	4.32e-10	6.77e-09	-0.849016	0.136019	7.48705	0.247047	0.000851976	0.0546514	0.0110703	0.0546514
rad	4.32e-10	6.77e-09	-0.784148	0.125626	5.3905	0.210738	0.00686534	0.0404802	0.0294228	0.0404802
Vm26Ac	4.31e-10	6.77e-09	0.948094	0.151883	7.76776	0.308063	0.000496244	0.0687087	0.0105345	0.0687087
CG11317	4.34e-10	6.79e-09	-0.830413	0.133051	4.46449	0.214089	0.0128085	0.0158138	0.0402993	0.0402993
unpg	4.41e-10	6.89e-09	-1.0243	0.164185	3.94353	0.359663	0.0287137	0.0521569	0.0474379	0.0521569
ringer	4.43e-10	6.91e-09	-0.564266	0.0904555	6.09228	0.100597	0.00279581	0.0123423	0.0217508	0.0217508
en	4.47e-10	6.97e-09	-1.3636	0.218646	3.36624	0.637487	0.0566193	0.0867984	0.0605562	0.0867984
gol	4.84e-10	7.52e-09	-0.594454	0.0955045	5.87948	0.116645	0.00344595	0.0188507	0.0239174	0.0239174
Mal-A7	5.25e-10	8.16e-09	4.58171	0.737618	4.69084	7.20895	0.116705	1.51553	0.0376848	1.51553
CG3246	5.37e-10	8.33e-09	1.1297	0.181976	6.09875	0.438377	0.00255808	0.0967879	0.0216875	0.0967879
CG17681	5.39e-10	8.36e-09	1.67954	0.270579	2.58865	0.912607	0.128534	0.0290775	0.0911051	0.0911051
Cf2	5.52e-10	8.54e-09	0.37183	0.059937	7.91357	0.045179	0.00037631	0.00784329	0.010401	0.010401
slpr	5.88e-10	9.08e-09	0.369829	0.0597106	8.58973	0.0470256	0.000195207	0.0105009	0.0103323	0.0105009
lncRNA:CR44922	5.92e-10	9.14e-09	-0.646741	0.104438	5.47843	0.126307	0.00433057	0.00912476	0.0283913	0.0283913
CG9663	6.1e-10	9.4e-09	0.511313	0.0826305	6.46065	0.0899233	0.00147286	0.0190105	0.0179361	0.0190105
CG13928	6.32e-10	9.72e-09	-0.539662	0.0872909	6.19173	0.0857481	0.00206203	0.00489032	0.0207971	0.0207971
grn	6.87e-10	1.05e-08	-1.12284	0.182011	3.68642	0.434194	0.0380628	0.0613211	0.0523081	0.0613211
Vps13D	6.86e-10	1.05e-08	0.430076	0.0697126	7.19672	0.0636992	0.000786283	0.0137933	0.0120502	0.0137933
CG14132	7.25e-10	1.11e-08	-0.875732	0.14215	4.27604	0.255043	0.018006	0.0324692	0.0426143	0.0426143
lncRNA:CR45204	7.32e-10	1.12e-08	-5.88832	0.956062	3.61549	11.949	0.860234	1.88193	0.053906	1.88193
Cyp309a1	7.35e-10	1.12e-08	2.57443	0.418041	4.26937	2.28417	0.051997	0.472278	0.0427002	0.472278
Tim17a2	7.46e-10	1.14e-08	-2.01526	0.327364	2.11299	1.3925	0.201682	0.111692	0.11982	0.11982
CG2010	7.73e-10	1.18e-08	-0.581643	0.0945711	6.35087	0.116658	0.00220814	0.0246229	0.019174	0.0246229
CG43679	7.81e-10	1.19e-08	-1.1074	0.180104	6.32621	0.42292	0.00234525	0.0949674	0.0194438	0.0949674
CG12826	8.1e-10	1.23e-08	-1.90963	0.310865	2.46346	1.25811	0.135645	0.154266	0.0977726	0.154266
CG6300	8.15e-10	1.24e-08	2.43087	0.395781	3.86263	2.03879	0.168716	0.301212	0.0488347	0.301212
CG4297	8.34e-10	1.27e-08	0.548968	0.0894332	6.06811	0.093937	0.00200647	0.0109146	0.0219884	0.0219884
Papss	8.55e-10	1.3e-08	0.379501	0.0618643	7.66909	0.0497162	0.000463642	0.0110179	0.0106671	0.0110179
upSET	8.79e-10	1.33e-08	0.458797	0.0748454	8.88511	0.0726853	0.000149124	0.0166564	0.0106829	0.0166564
Mal-A6	8.91e-10	1.35e-08	3.0854	0.503503	6.73594	3.28769	0.00457809	0.755968	0.0149777	0.755968
CG43109	8.98e-10	1.36e-08	2.0888	0.340945	1.84332	1.44737	0.207949	0.075231	0.140781	0.140781
alt	9.04e-10	1.36e-08	0.399553	0.0652281	9.23623	0.0551426	0.000100978	0.0126632	0.0114321	0.0126632
CG31205	9.15e-10	1.38e-08	0.731116	0.119393	5.4391	0.184658	0.00505813	0.0377061	0.0288511	0.0377061
dpr6	1e-09	1.51e-08	0.661855	0.108342	6.13704	0.151482	0.00164805	0.0335662	0.0213167	0.0335662
Sik3	1.02e-09	1.53e-08	0.385897	0.063199	7.7734	0.0515067	0.000449118	0.0115332	0.0105283	0.0115332
CG31145	1.03e-09	1.54e-08	0.453912	0.074346	7.24876	0.0712661	0.000704339	0.0158776	0.0118439	0.0158776
CG34417	1.04e-09	1.55e-08	-0.478022	0.0783185	9.34444	0.0790482	0.000628953	0.0177724	0.0117432	0.0177724
CG14798	1.08e-09	1.62e-08	-0.578004	0.0947997	5.88234	0.106805	0.00307373	0.0141849	0.0238872	0.0238872
SP555	1.15e-09	1.71e-08	-0.902295	0.148221	4.56141	0.27269	0.0267405	0.0289775	0.0391681	0.0391681
CG14207	1.19e-09	1.78e-08	-0.359785	0.0591631	8.33319	0.0396311	0.000293608	0.00446704	0.0102072	0.0102072
nej	1.2e-09	1.79e-08	0.504729	0.0830093	9.40091	0.08827	7.89e-05	0.0205927	0.0119218	0.0205927
CG17778	1.22e-09	1.82e-08	-0.866739	0.142624	4.1879	0.228793	0.0172462	0.00905481	0.043779	0.043779
Hk	1.27e-09	1.89e-08	-0.569942	0.0938773	6.81925	0.112626	0.00116115	0.0252777	0.0142293	0.0252777
TM9SF3	1.29e-09	1.92e-08	0.416569	0.0686472	7.72734	0.0601783	0.000519551	0.0136177	0.0105832	0.0136177
CG14410	1.31e-09	1.93e-08	-0.81987	0.135141	4.44423	0.2137	0.0142497	0.0191639	0.0405396	0.0405396
LManI	1.31e-09	1.94e-08	1.10746	0.18256	4.74516	0.425387	0.0107406	0.0892436	0.0370643	0.0892436
CG11099	1.32e-09	1.95e-08	-0.651821	0.107475	5.39287	0.144958	0.00525811	0.0267339	0.0293948	0.0293948
tud	1.39e-09	2.06e-08	0.378159	0.062443	9.29934	0.0419112	8.87e-05	0.00311238	0.0116087	0.0116087
pcx	1.42e-09	2.09e-08	0.586923	0.0969533	8.02558	0.119585	0.000310642	0.0278892	0.0103141	0.0278892
Rbcn-3B	1.43e-09	2.1e-08	0.571579	0.0944402	7.93864	0.113425	0.000381673	0.0263752	0.0103816	0.0263752
beat-IIIc	1.45e-09	2.13e-08	-0.729783	0.120631	4.79846	0.176874	0.00720203	0.0275851	0.0364534	0.0364534
Hsc70-1	1.47e-09	2.16e-08	-0.652722	0.107927	6.80025	0.147962	0.00109738	0.033847	0.0143915	0.033847
CG15529	1.54e-09	2.25e-08	-0.717622	0.118799	4.988	0.166485	0.00810561	0.0205337	0.0342341	0.0342341
CG13877	1.61e-09	2.36e-08	1.09956	0.182263	4.20836	0.420334	0.0277239	0.0719354	0.0435027	0.0719354
CG42502	1.71e-09	2.49e-08	-0.72385	0.120173	8.07181	0.182284	0.000229434	0.0430952	0.0102775	0.0430952
CG10570	1.71e-09	2.49e-08	-0.72385	0.120173	8.07181	0.182284	0.000229434	0.0430952	0.0102775	0.0430952
CG32700	1.71e-09	2.49e-08	-0.947053	0.157223	5.03843	0.312028	0.010345	0.0638123	0.0336309	0.0638123
chinmo	1.73e-09	2.52e-08	-0.887646	0.147408	5.39735	0.274147	0.00288232	0.0623047	0.029342	0.0623047
Spp	1.73e-09	2.52e-08	0.355288	0.0590033	8.42882	0.0374783	0.000210258	0.00314699	0.0102339	0.0102339
Rbp6	1.74e-09	2.52e-08	-0.598689	0.0994392	6.71547	0.124721	0.00134074	0.0283237	0.0151755	0.0283237
CG2493	1.74e-09	2.52e-08	0.516815	0.0858376	7.43193	0.0929397	0.000587215	0.0215171	0.0112267	0.0215171
hoe2	1.74e-09	2.52e-08	-0.725948	0.12058	4.93169	0.161242	0.00871485	0.0105517	0.0349035	0.0349035
CAH1	1.75e-09	2.53e-08	-0.639804	0.106284	7.28067	0.142449	0.000808976	0.0330801	0.0117246	0.0330801
CG44245	1.78e-09	2.57e-08	-0.511131	0.0849473	7.39629	0.0909316	0.000654839	0.0209933	0.0113346	0.0209933
GramD1B	1.78e-09	2.57e-08	0.355647	0.0591093	8.41767	0.0417889	0.000252223	0.00777016	0.0102295	0.0102295
CG11791	1.79e-09	2.58e-08	-0.374268	0.0622111	7.5149	0.045681	0.000614771	0.00761143	0.0109959	0.0109959
CROT	1.79e-09	2.58e-08	0.401717	0.0667773	7.10393	0.0561732	0.000863519	0.0125141	0.0124571	0.0125141
Octalpha2R	1.81e-09	2.61e-08	-0.674572	0.112172	5.21981	0.156165	0.00629253	0.0289748	0.0314548	0.0314548
CG9384	1.83e-09	2.64e-08	0.471251	0.078388	7.45555	0.0773248	0.000663954	0.0177701	0.0111582	0.0177701
Pmp70	1.85e-09	2.65e-08	0.366998	0.0610574	8.66626	0.0469003	0.000181052	0.011003	0.0104003	0.011003
CG9919	1.93e-09	2.76e-08	-0.737234	0.122792	4.79364	0.157397	0.00872503	0.00135776	0.0365087	0.0365087
CG15537	2.05e-09	2.93e-08	-0.776795	0.129593	4.54462	0.178302	0.0110206	0.00408835	0.0393623	0.0393623
CG9727	2.07e-09	2.96e-08	0.551833	0.0920881	7.63277	0.106179	0.000373703	0.025067	0.0107294	0.025067
DNaseII	2.11e-09	3.01e-08	0.480438	0.0802142	6.48567	0.0746383	0.00165188	0.011204	0.0176511	0.0176511
CG5023	2.12e-09	3.02e-08	-0.439455	0.0733811	7.33738	0.0673551	0.000695684	0.0154587	0.0115253	0.0154587
CG46314	2.14e-09	3.05e-08	1.26261	0.210893	5.39374	0.556075	0.00826335	0.125165	0.0293846	0.125165
Tlk	2.15e-09	3.06e-08	0.373412	0.0623805	9.28595	0.0428514	0.00010389	0.0052017	0.0115701	0.0115701
CG46317	2.15e-09	3.06e-08	3.0464	0.508924	4.80195	3.23744	0.083948	0.693064	0.0364131	0.693064
mam	2.16e-09	3.07e-08	0.35913	0.0600042	7.91505	0.043605	0.000401653	0.00887147	0.0103999	0.0103999
His1:CG33822	2.24e-09	3.17e-08	-0.719401	0.120317	5.85817	0.180627	0.00241078	0.0410176	0.0241432	0.0410176
His1:CG33825	2.24e-09	3.17e-08	-0.719401	0.120317	5.85817	0.180627	0.00241078	0.0410176	0.0241432	0.0410176
His1:CG33828	2.24e-09	3.17e-08	-0.719401	0.120317	5.85817	0.180627	0.00241078	0.0410176	0.0241432	0.0410176
His1:CG33831	2.24e-09	3.17e-08	-0.719401	0.120317	5.85817	0.180627	0.00241078	0.0410176	0.0241432	0.0410176
Ldsdh1	2.27e-09	3.2e-08	0.478748	0.0800908	7.212	0.0800031	0.000829542	0.0184141	0.011988	0.0184141
CG7236	2.3e-09	3.25e-08	-1.00116	0.167561	3.66473	0.325407	0.0314467	0.0258029	0.0527832	0.0527832
Msp300	2.33e-09	3.28e-08	-0.628924	0.105296	9.38363	0.138114	0.00064247	0.0326191	0.011866	0.0326191
lid	2.35e-09	3.3e-08	0.367661	0.0615682	9.103	0.0472039	0.00010338	0.0112686	0.0111026	0.0112686
Oatp58Dc	2.38e-09	3.35e-08	-0.750602	0.125744	6.40432	0.196778	0.00193603	0.0454989	0.0185763	0.0454989
RpI12	2.39e-09	3.36e-08	-0.587145	0.0983722	6.44846	0.120412	0.00179083	0.0272404	0.018075	0.0272404
lncRNA:CR43417	2.52e-09	3.53e-08	1.15152	0.193201	3.84573	0.463438	0.0258322	0.0861479	0.0491408	0.0861479
comm	2.52e-09	3.53e-08	-0.752254	0.126218	4.73781	0.181806	0.0106447	0.019576	0.0371484	0.0371484
CG13323	2.53e-09	3.53e-08	1.14617	0.192321	9.00038	0.45916	0.00057712	0.110385	0.0108871	0.110385
CG33981	2.6e-09	3.63e-08	0.416339	0.0699122	7.24888	0.0606043	0.000457183	0.014206	0.0118434	0.014206
CG9259	2.63e-09	3.67e-08	-0.867039	0.14564	7.00002	0.262873	0.00102061	0.0626128	0.0129788	0.0626128
CG6044	2.68e-09	3.73e-08	-0.574116	0.0964896	5.8128	0.106013	0.00330175	0.0144297	0.024629	0.024629
Culd	2.9e-09	4.03e-08	-0.454417	0.0765357	6.63135	0.0593844	0.00153743	0.00183704	0.0160357	0.0160357
CG43351	2.95e-09	4.1e-08	1.50447	0.253522	4.88479	0.792592	0.0111825	0.181637	0.0354539	0.181637
Chd64	2.97e-09	4.13e-08	0.352153	0.0593538	8.68645	0.0398179	0.00014787	0.00644829	0.0104208	0.0104208
Uhg1	2.99e-09	4.15e-08	-0.480869	0.081065	7.33594	0.0809863	0.000714254	0.0190003	0.0115302	0.0190003
CG7342	3.04e-09	4.21e-08	-0.849923	0.143345	4.14114	0.234632	0.017218	0.0241659	0.0444253	0.0444253
sona	3.12e-09	4.31e-08	1.22955	0.207505	6.97164	0.529738	0.00116555	0.128009	0.0131372	0.128009
His4:CG33899	3.18e-09	4.36e-08	-0.982954	0.165988	3.43042	0.32044	0.0239461	0.0386789	0.0587103	0.0587103
His4:CG33897	3.18e-09	4.36e-08	-0.982954	0.165988	3.43042	0.32044	0.0239461	0.0386789	0.0587103	0.0587103
His4:CG33895	3.18e-09	4.36e-08	-0.982954	0.165988	3.43042	0.32044	0.0239461	0.0386789	0.0587103	0.0587103
His4:CG33893	3.18e-09	4.36e-08	-0.982954	0.165988	3.43042	0.32044	0.0239461	0.0386789	0.0587103	0.0587103
His4:CG33891	3.18e-09	4.36e-08	-0.982954	0.165988	3.43042	0.32044	0.0239461	0.0386789	0.0587103	0.0587103
Obp84a	3.18e-09	4.36e-08	-1.02922	0.173796	4.09936	0.371273	0.0328176	0.0577976	0.0450219	0.0577976
VGlut	3.18e-09	4.36e-08	-0.610713	0.103128	5.53908	0.123527	0.00421761	0.019771	0.0276883	0.0276883
Syt4	3.17e-09	4.36e-08	-0.51917	0.0876587	6.1864	0.0805983	0.00220493	0.00559205	0.0208472	0.0208472
CG14419	3.17e-09	4.36e-08	-0.855384	0.144431	5.05537	0.256441	0.00702403	0.0555565	0.0334279	0.0555565
eIF4G1	3.3e-09	4.51e-08	0.519558	0.0878223	9.81113	0.0946551	5.35e-05	0.0230848	0.0135905	0.0230848
CG4744	3.32e-09	4.54e-08	2.3058	0.389838	0.9878	1.86448	0.153256	0.302665	0.239223	0.302665
Set2	3.33e-09	4.54e-08	0.390293	0.0659917	8.8648	0.0534211	0.000136656	0.012928	0.010651	0.012928
CG42322	3.35e-09	4.56e-08	-0.591258	0.0999871	5.62657	0.105948	0.00330356	0.00836346	0.0266887	0.0266887
sug	3.37e-09	4.59e-08	-1.04401	0.176582	6.08142	0.382302	0.00291209	0.0906314	0.0218573	0.0906314
grass	3.38e-09	4.6e-08	0.598937	0.101312	5.607	0.11944	0.00388161	0.0198848	0.0269107	0.0269107
MtnD	3.4e-09	4.61e-08	1.52493	0.257979	4.58424	0.815713	0.0147545	0.184905	0.038905	0.184905
Apoltp	3.43e-09	4.65e-08	1.19923	0.202931	7.1353	0.504539	0.000933533	0.12261	0.0123137	0.12261
CG42342	3.44e-09	4.66e-08	-0.632941	0.107116	5.35667	0.136958	0.00459845	0.0258712	0.0298229	0.0298229
CG9649	3.47e-09	4.7e-08	0.690144	0.116824	5.87897	0.167121	0.00313789	0.0378057	0.0239228	0.0378057
Hsc70-3	3.54e-09	4.78e-08	0.461684	0.0781936	10.5042	0.0680471	3.18e-05	0.0108745	0.0183109	0.0183109
CG1213	3.63e-09	4.9e-08	0.693675	0.117572	7.39341	0.168932	0.000613405	0.0408561	0.0113435	0.0408561
Cad74A	3.64e-09	4.9e-08	1.02079	0.173022	7.53852	0.365829	0.000616731	0.0891927	0.0109351	0.0891927
CG30503	3.72e-09	5e-08	0.812175	0.137742	6.46946	0.231643	0.00570225	0.051216	0.0178357	0.051216
CG15465	3.72e-09	5e-08	-1.2119	0.205543	5.91237	0.515776	0.00733159	0.119413	0.0235719	0.119413
Doc1	3.88e-09	5.21e-08	-1.19634	0.203145	3.14852	0.502884	0.0521308	0.0716726	0.0674917	0.0716726
Tsp42Ei	4.01e-09	5.38e-08	-0.545313	0.0926835	5.95263	0.104328	0.00261654	0.0229349	0.0231542	0.0231542
pico	4.14e-09	5.53e-08	0.409278	0.0696228	8.88943	0.0589042	0.000134503	0.0144075	0.0106899	0.0144075
snRNA:U1:21D	4.14e-09	5.53e-08	-0.708291	0.120492	4.54576	0.173819	0.00420572	0.0364918	0.0393491	0.0393491
snRNA:U1:95Cb	4.14e-09	5.53e-08	-0.708291	0.120492	4.54576	0.173819	0.00420572	0.0364918	0.0393491	0.0393491
snRNA:U1:95Ca	4.14e-09	5.53e-08	-0.708291	0.120492	4.54576	0.173819	0.00420572	0.0364918	0.0393491	0.0393491
CG13306	4.19e-09	5.59e-08	-0.962602	0.163806	3.65301	0.305586	0.0274518	0.0307115	0.053045	0.053045
Ms	4.24e-09	5.64e-08	-0.694062	0.118144	5.24156	0.169446	0.00590205	0.0359718	0.0311945	0.0359718
ninaE	4.27e-09	5.68e-08	-0.644052	0.109654	10.103	0.145921	4.04e-05	0.0360318	0.0152411	0.0360318
CG43255	4.35e-09	5.77e-08	-0.767123	0.130675	4.62835	0.206281	0.0128291	0.0375365	0.0383988	0.0383988
tna	4.38e-09	5.81e-08	-0.657145	0.111963	7.75524	0.151963	0.000460909	0.0371465	0.0105489	0.0371465
CG8184	4.62e-09	6.13e-08	0.600315	0.102438	8.85559	0.126904	0.00013621	0.0313442	0.0106369	0.0313442
CG4133	4.67e-09	6.18e-08	-0.78607	0.134173	4.48009	0.189745	0.013892	0.0094555	0.0401153	0.0401153
lncRNA:CR43611	4.74e-09	6.27e-08	-2.11159	0.360577	1.80594	1.57063	0.207738	0.182308	0.144004	0.182308
CG17928	4.76e-09	6.29e-08	0.571133	0.0975405	5.74642	0.112403	0.00319093	0.0225947	0.0253515	0.0253515
a5	4.83e-09	6.37e-08	-0.974115	0.16643	4.44072	0.334334	0.0130687	0.0700283	0.0405814	0.0700283
CG43313	4.87e-09	6.42e-08	0.345202	0.0589932	8.30685	0.041853	0.000236179	0.0100528	0.0102044	0.0102044
CG1909	4.93e-09	6.49e-08	-0.568116	0.0971199	5.76521	0.0980389	0.00315121	0.00786481	0.0251456	0.0251456
CG13937	4.94e-09	6.5e-08	-0.550837	0.0941755	5.91433	0.0924341	0.00305562	0.00759547	0.0235515	0.0235515
PK2-R2	4.99e-09	6.56e-08	-1.41906	0.242679	2.90846	0.709817	0.0975679	0.0791108	0.0764927	0.0791108
Oscillin	5.04e-09	6.62e-08	0.594162	0.101639	5.86508	0.124455	0.00319574	0.0277959	0.0240699	0.0277959
Jon65Ai	5.07e-09	6.65e-08	-1.42531	0.243862	7.15463	0.716234	0.00120112	0.177205	0.0122283	0.177205
Uggt	5.26e-09	6.89e-08	0.479802	0.0821771	8.57288	0.0812019	0.000191868	0.0200674	0.0103191	0.0200674
Dh31	5.33e-09	6.97e-08	-0.706474	0.121043	4.87027	0.151373	0.00833076	0.00844806	0.0356231	0.0356231
CG31769	5.35e-09	6.99e-08	0.680623	0.116628	6.11171	0.163437	0.00214728	0.0386589	0.0215614	0.0386589
slo	5.48e-09	7.15e-08	-0.452519	0.0775941	6.77187	0.0722677	0.000913055	0.0171495	0.0146434	0.0171495
srp	5.51e-09	7.19e-08	0.757693	0.129945	7.7238	0.202624	0.000556499	0.0501005	0.0105878	0.0501005
CG12744	5.52e-09	7.19e-08	-0.371337	0.0636878	7.40604	0.048669	0.000728009	0.0114404	0.0113045	0.0114404
CG43902	5.68e-09	7.38e-08	-0.761152	0.130649	5.2062	0.204558	0.00611531	0.0450923	0.031618	0.0450923
CG14309	5.68e-09	7.38e-08	1.38029	0.236923	8.91047	0.672689	0.000147652	0.16825	0.0107245	0.16825
Hmu	5.84e-09	7.57e-08	0.351624	0.0604021	8.95513	0.0424807	0.000142987	0.00949401	0.0108023	0.0108023
Tusp	5.88e-09	7.62e-08	0.889976	0.152912	5.96874	0.279785	0.00318069	0.0669651	0.0229886	0.0669651
CG43175	5.89e-09	7.62e-08	2.5043	0.430295	2.23047	2.21538	0.237639	0.317821	0.11183	0.317821
sbb	6.1e-09	7.89e-08	0.363844	0.0625804	9.29485	0.0451765	0.000153265	0.00982606	0.0115957	0.0115957
CG6084	6.26e-09	8.09e-08	0.388471	0.0668667	9.76347	0.0434684	5.32e-05	0.00248921	0.0133603	0.0133603
CG31445	6.33e-09	8.17e-08	0.658758	0.113428	5.16343	0.142668	0.00646648	0.0202795	0.0321311	0.0321311
CG11052	6.36e-09	8.19e-08	-1.12463	0.193665	3.60688	0.447235	0.032449	0.0800689	0.054109	0.0800689
CG3649	6.79e-09	8.75e-08	-1.10764	0.191106	3.29954	0.403667	0.0469978	0.0289743	0.0625671	0.0625671
Cpr49Ae	6.83e-09	8.78e-08	0.693381	0.119651	6.41905	0.170165	0.00168217	0.0412667	0.0184095	0.0412667
Ude	6.86e-09	8.81e-08	-0.556403	0.0960263	5.80246	0.100082	0.0029225	0.0142926	0.0247406	0.0247406
AstA	6.89e-09	8.85e-08	-0.705584	0.121789	4.8265	0.159435	0.00836773	0.0176562	0.0361302	0.0361302
tsh	7.06e-09	9.04e-08	-0.611881	0.105687	5.42087	0.122819	0.00444391	0.0183375	0.029065	0.029065
CG4607	7.17e-09	9.18e-08	0.923305	0.159551	6.45369	0.301924	0.00201685	0.0743523	0.0180154	0.0743523
Etf-QO	7.18e-09	9.18e-08	0.341562	0.0590261	8.44534	0.035283	0.000211206	0.00360075	0.010241	0.010241
CG9717	7.34e-09	9.37e-08	-0.58331	0.100866	6.07946	0.120543	0.00232606	0.028196	0.0218765	0.028196
clu	7.54e-09	9.63e-08	0.565637	0.0978892	8.85468	0.113391	0.000154053	0.0285928	0.0106355	0.0285928
pigeon	7.55e-09	9.63e-08	0.497556	0.0861106	7.50329	0.0877397	0.000610779	0.0216343	0.0110266	0.0216343
oaf	7.59e-09	9.66e-08	0.37792	0.0654139	8.35129	0.0506218	0.000281394	0.0125555	0.0102103	0.0125555
betaTub60D	7.66e-09	9.74e-08	0.752895	0.130353	7.46914	0.200937	0.000641999	0.0503336	0.0111198	0.0503336
asRNA:CR44995	8e-09	1.02e-07	-3.91051	0.677915	1.89003	5.42393	0.359328	1.01938	0.13687	1.01938
Pgant5	8.14e-09	1.03e-07	0.39107	0.0678298	8.62805	0.0542576	0.000182268	0.0136204	0.0103646	0.0136204
CG5773	8.17e-09	1.04e-07	-0.668409	0.115945	6.62569	0.15851	0.0015175	0.0388124	0.0160959	0.0388124
DnaJ-60	8.18e-09	1.04e-07	-0.751594	0.130381	6.62271	0.200423	0.00256158	0.0484358	0.0161278	0.0484358
lncRNA:CR43264	8.23e-09	1.04e-07	0.816208	0.141613	5.04967	0.236383	0.00767986	0.0524826	0.0334962	0.0524826
CG10479	8.33e-09	1.05e-07	-0.598413	0.103862	5.51241	0.125795	0.00436541	0.0265802	0.0279965	0.0279965
CG17110	8.33e-09	1.05e-07	-0.713584	0.123849	5.19338	0.180706	0.00553218	0.0404836	0.0317717	0.0404836
G9a	8.42e-09	1.06e-07	0.454095	0.0788376	9.46108	0.073188	8.38e-05	0.0185624	0.0121248	0.0185624
Fur2	8.49e-09	1.07e-07	0.40108	0.069652	9.60937	0.0571034	6.08e-05	0.0144934	0.0126841	0.0144934
SclA	8.49e-09	1.07e-07	-0.859098	0.149192	5.04943	0.26199	0.0136094	0.0531651	0.0334991	0.0531651
Edem2	8.51e-09	1.07e-07	0.502597	0.0872866	7.26042	0.0896709	0.000742236	0.0221146	0.0117996	0.0221146
Slik	8.66e-09	1.09e-07	0.44708	0.0776846	8.7206	0.0709717	0.000200942	0.0179038	0.010458	0.0179038
mask	8.81e-09	1.11e-07	0.52689	0.0915993	9.41803	0.0985958	9.16e-05	0.0250797	0.0119782	0.0250797
CG12355	9e-09	1.13e-07	-0.628812	0.109385	5.57292	0.14047	0.00454642	0.0313487	0.0272996	0.0313487
CG42540	8.99e-09	1.13e-07	-0.537659	0.0935274	5.97427	0.0915172	0.00331018	0.0106355	0.0229319	0.0229319
FANCI	9.02e-09	1.13e-07	0.542368	0.0943532	7.15918	0.104506	0.000915382	0.0257922	0.0122086	0.0257922
Sobp	9.45e-09	1.18e-07	-0.618829	0.107803	5.95718	0.136136	0.00301533	0.0318489	0.0231073	0.0318489
Tsp42Ek	9.48e-09	1.18e-07	-0.932477	0.162459	3.83591	0.263578	0.029858	-0.000775754	0.0493211	0.0493211
GLS	9.51e-09	1.18e-07	0.460802	0.0802894	7.73036	0.0754916	0.000450033	0.0188891	0.0105793	0.0188891
alc	9.56e-09	1.19e-07	-0.340654	0.0593649	8.24913	0.0362554	0.000366992	0.00470045	0.0102056	0.0102056
CG42402	9.58e-09	1.19e-07	0.647684	0.112876	5.21581	0.148629	0.00672041	0.0309229	0.0315028	0.0315028
pwn	9.82e-09	1.22e-07	1.17031	0.204105	5.78483	0.487149	0.00365281	0.121323	0.0249318	0.121323
tefu	1.01e-08	1.25e-07	0.464859	0.0811315	7.59767	0.0768865	0.0004824	0.0192645	0.010798	0.0192645
CG3955	1.02e-08	1.26e-07	-0.791282	0.138149	4.33612	0.198667	0.0154015	0.015294	0.0418543	0.0418543
Obp99a	1.02e-08	1.26e-07	2.06339	0.360273	7.22184	1.51515	0.00149202	0.387897	0.0119487	0.387897
CG12182	1.02e-08	1.27e-07	0.567039	0.0990188	5.71962	0.112062	0.00376712	0.023041	0.025647	0.025647
CG1542	1.05e-08	1.3e-07	-0.339096	0.0592651	8.12332	0.0407607	0.000291688	0.0100492	0.0102454	0.0102454
Jarid2	1.06e-08	1.31e-07	0.355225	0.0620982	9.25168	0.0403299	9.44e-05	0.00641288	0.0114741	0.0114741
sm	1.08e-08	1.32e-07	0.526771	0.0921187	6.48468	0.0988216	0.00234573	0.0231118	0.0176624	0.0231118
CG16711	1.07e-08	1.32e-07	0.340176	0.0594864	8.03884	0.0347378	0.000312665	0.00318292	0.0103032	0.0103032
CG43366	1.11e-08	1.36e-07	1.38767	0.242864	3.05455	0.686035	0.0716649	0.105284	0.0708341	0.105284
OtopLb	1.11e-08	1.37e-07	-0.953358	0.166881	5.62118	0.323832	0.00433711	0.0792104	0.0267498	0.0792104
CG6337	1.12e-08	1.38e-07	-1.35089	0.236538	4.6999	0.650292	0.0121882	0.155662	0.0375813	0.155662
Ptp10D	1.13e-08	1.38e-07	0.60677	0.106255	7.87619	0.131201	0.000441544	0.0334287	0.010431	0.0334287
GlyP	1.14e-08	1.4e-07	0.41421	0.0725661	10.1229	0.0611533	4.85e-05	0.015749	0.0153702	0.015749
mbl	1.2e-08	1.46e-07	-0.886991	0.155609	7.64182	0.280607	0.000945558	0.0716969	0.0107131	0.0716969
dpr7	1.21e-08	1.48e-07	-0.663024	0.116359	5.08248	0.151155	0.00751551	0.0268749	0.0331027	0.0331027
CG32201	1.22e-08	1.49e-07	2.42572	0.42578	1.76187	2.09918	0.168689	0.375177	0.147907	0.375177
alpha-Man-Ic	1.22e-08	1.49e-07	-0.808549	0.141929	4.1105	0.213275	0.0155703	0.0229073	0.0448609	0.0448609
CG8329	1.24e-08	1.52e-07	-1.01048	0.177478	6.82105	0.364377	0.00131248	0.093183	0.0142142	0.093183
esg	1.3e-08	1.58e-07	-0.974725	0.171414	3.53431	0.297854	0.0322467	0.0103659	0.0559017	0.0559017
Cyp9b2	1.3e-08	1.58e-07	1.16283	0.204514	6.95385	0.482848	0.00106778	0.12441	0.013244	0.12441
Dfd	1.33e-08	1.61e-07	-0.9327	0.164137	3.72235	0.287517	0.0292774	0.0260128	0.0515458	0.0515458
CG32944	1.33e-08	1.61e-07	-0.740825	0.130379	4.5151	0.17437	0.0112909	0.0158694	0.0397052	0.0397052
CG5171	1.34e-08	1.62e-07	0.591098	0.104042	6.43675	0.124812	0.00167996	0.0307945	0.0182084	0.0307945
CG6972	1.37e-08	1.66e-07	-0.594323	0.104699	5.48122	0.114565	0.00452703	0.0155281	0.0283588	0.0283588
CG6701	1.38e-08	1.67e-07	0.337385	0.0594443	8.67799	0.0359208	0.000188826	0.00517549	0.010412	0.010412
CG30172	1.4e-08	1.69e-07	-0.807076	0.142259	4.73848	0.232841	0.0158957	0.0448176	0.0371406	0.0448176
dpr19	1.43e-08	1.72e-07	-0.723935	0.127671	4.64752	0.150627	0.0107198	-0.00225441	0.0381796	0.0381796
CG14195	1.43e-08	1.73e-07	-0.665074	0.117314	5.00775	0.153665	0.00728969	0.029045	0.0339981	0.0339981
CG30431	1.45e-08	1.75e-07	1.50737	0.265974	4.22285	0.812611	0.0187661	0.19346	0.0433093	0.19346
CG6290	1.46e-08	1.76e-07	-0.983739	0.17362	4.14904	0.34614	0.0176578	0.0727738	0.0443146	0.0727738
CG11309	1.48e-08	1.78e-07	0.356249	0.0629038	7.46706	0.0452333	0.000745041	0.0109376	0.0111256	0.0111256
Cyp308a1	1.49e-08	1.79e-07	-0.897981	0.158577	3.9277	0.288501	0.0202362	0.0552034	0.0477028	0.0552034
lbl	1.5e-08	1.79e-07	-1.00763	0.177963	3.47924	0.317047	0.0376503	0.0065043	0.0573624	0.0573624
RpL24-like	1.5e-08	1.79e-07	-0.569871	0.100647	9.10062	0.116196	0.000119964	0.0302697	0.0110973	0.0302697
lncRNA:CR45680	1.54e-08	1.84e-07	-1.28608	0.227322	4.34354	0.592021	0.0163716	0.138654	0.041762	0.138654
P58IPK	1.55e-08	1.86e-07	0.333758	0.0590132	8.22707	0.0370148	0.000238878	0.00705897	0.0102088	0.0102088
CG10657	1.58e-08	1.89e-07	-0.774493	0.13701	4.56483	0.20465	0.0171868	0.0279767	0.0391286	0.0391286
sob	1.59e-08	1.89e-07	-0.96184	0.17018	3.52878	0.287538	0.0308394	0.00791197	0.0560446	0.0560446
Jon99Fii	1.59e-08	1.9e-07	-2.07207	0.366671	7.24019	1.53762	0.00145883	0.401884	0.0118768	0.401884
Golgin245	1.61e-08	1.92e-07	0.332876	0.0589265	8.36256	0.0369515	0.000204293	0.00720029	0.0102127	0.0102127
KdelR	1.62e-08	1.93e-07	0.333019	0.0589619	8.36085	0.0333042	0.000217203	0.00314684	0.0102123	0.0102123
GluRIB	1.69e-08	2.01e-07	-0.754344	0.13373	4.3549	0.203965	0.0112436	0.0424079	0.0416214	0.0424079
lncRNA:CR45433	1.69e-08	2.01e-07	-0.730108	0.129432	4.56746	0.166914	0.0111595	0.012529	0.0390982	0.0390982
laza	1.73e-08	2.05e-07	-0.494395	0.0876981	6.19333	0.0876372	0.00220336	0.0208695	0.0207821	0.0208695
SmydA-8	1.74e-08	2.06e-07	-0.829564	0.147187	6.09223	0.246768	0.00834713	0.0566447	0.0217513	0.0566447
CG11550	1.74e-08	2.06e-07	-0.64995	0.115321	5.09511	0.146706	0.00694561	0.0277002	0.0329512	0.0329512
CG43920	1.76e-08	2.08e-07	3.9269	0.696967	3.16083	5.53041	0.19682	1.26047	0.0670702	1.26047
asRNA:CR45481	1.76e-08	2.08e-07	0.744971	0.132234	4.71645	0.17748	0.015065	0.0136689	0.0373924	0.0373924
SPR	1.78e-08	2.1e-07	-0.552042	0.0980231	6.19482	0.109319	0.00244258	0.026383	0.0207681	0.026383
ninaA	1.79e-08	2.1e-07	-0.885784	0.15729	5.02016	0.281458	0.00794632	0.0662739	0.0338497	0.0662739
side-V	1.8e-08	2.12e-07	-0.589693	0.104743	5.43954	0.122896	0.0040675	0.0267964	0.0288459	0.0288459
Gad1	1.82e-08	2.14e-07	-0.530144	0.094187	6.94438	0.100845	0.000974416	0.0256392	0.0133032	0.0256392
CG16713	1.86e-08	2.18e-07	1.17813	0.209461	5.87237	0.498198	0.00302384	0.128598	0.0239926	0.128598
Lim1	1.88e-08	2.2e-07	-0.687101	0.122199	4.88515	0.148145	0.00934845	0.0119786	0.0354497	0.0354497
Act42A	1.88e-08	2.2e-07	0.351713	0.0625517	9.31369	0.0411387	8.74e-05	0.00805461	0.0116507	0.0116507
Tsf3	1.96e-08	2.29e-07	0.713058	0.126975	4.67477	0.160074	0.0104992	0.0130471	0.0378683	0.0378683
CG10936	2.01e-08	2.35e-07	0.611815	0.109038	6.7061	0.134512	0.00142025	0.0342475	0.0152675	0.0342475
CG12708	2.04e-08	2.39e-07	-0.764426	0.1363	5.6709	0.210034	0.00409302	0.0516397	0.0261895	0.0516397
CG3603	2.08e-08	2.43e-07	0.394468	0.0703764	6.88077	0.0476598	0.00111682	0.00462755	0.0137417	0.0137417
lncRNA:CR44832	2.1e-08	2.45e-07	-0.845868	0.150947	4.03236	0.246375	0.0223336	0.0340318	0.046021	0.046021
CG34155	2.1e-08	2.45e-07	-0.882456	0.157491	3.78005	0.256127	0.0240281	0.0240935	0.050382	0.050382
GluRIIC	2.11e-08	2.45e-07	-0.745014	0.132965	4.45987	0.175262	0.0126852	0.013589	0.040354	0.040354
CG42246	2.13e-08	2.48e-07	-0.798654	0.14259	4.34994	0.229409	0.0152411	0.0457544	0.0416827	0.0457544
Cyp4p3	2.15e-08	2.49e-07	0.777547	0.138855	4.86024	0.217469	0.00826693	0.0495754	0.0357397	0.0495754
CG17514	2.19e-08	2.54e-07	0.368118	0.0657754	8.63351	0.0487569	0.00025026	0.012729	0.0103694	0.012729
RpL7-like	2.32e-08	2.69e-07	-0.399795	0.071567	8.44757	0.0575602	0.000230531	0.015135	0.0102421	0.015135
AhcyL1	2.32e-08	2.69e-07	0.338943	0.0606736	8.30159	0.0413715	0.000243113	0.0108007	0.0102041	0.0108007
clumsy	2.33e-08	2.7e-07	-0.534873	0.0957644	5.83735	0.102524	0.0031471	0.0238029	0.0243654	0.0243654
Tmhs	2.35e-08	2.71e-07	0.621365	0.111272	7.20212	0.139066	0.000759943	0.0363847	0.012028	0.0363847
wge	2.37e-08	2.73e-07	0.381398	0.0683168	8.89998	0.0524008	0.000130202	0.0138713	0.010707	0.0138713
comm2	2.41e-08	2.78e-07	0.641465	0.114962	5.57688	0.148265	0.00391746	0.0357311	0.0272542	0.0357311
obe	2.49e-08	2.87e-07	0.463528	0.0831565	7.73028	0.0774567	0.000431559	0.0203135	0.0105794	0.0203135
kst	2.5e-08	2.88e-07	0.509168	0.0913645	8.62917	0.0934709	0.000181048	0.0248614	0.0103656	0.0248614
CG5390	2.51e-08	2.89e-07	0.549117	0.0985371	6.64335	0.108716	0.0013153	0.0278134	0.0159087	0.0278134
Fur1	2.54e-08	2.92e-07	0.329872	0.0592173	8.14119	0.0356345	0.000283626	0.00626956	0.0102365	0.0102365
CG17032	2.58e-08	2.96e-07	0.5191	0.0932344	5.94894	0.0952014	0.00288575	0.0209963	0.0231922	0.0231922
CG2841	2.63e-08	3.01e-07	0.37981	0.0682527	8.2225	0.0520472	0.000257419	0.0137179	0.0102096	0.0137179
CG12179	2.63e-08	3.01e-07	0.398678	0.0716439	7.35892	0.057347	0.000613375	0.0147852	0.0114537	0.0147852
Cpr97Eb	2.63e-08	3.01e-07	-0.760471	0.136669	4.36055	0.197547	0.0144832	0.0293239	0.0415518	0.0415518
Alg1	2.65e-08	3.03e-07	-0.33317	0.0598893	7.90487	0.0372074	0.000352343	0.00727509	0.0104078	0.0104078
CG4563	2.69e-08	3.07e-07	2.7213	0.489403	3.54389	2.6729	0.0991016	0.619444	0.0556563	0.619444
CG9377	2.74e-08	3.13e-07	-1.69715	0.305407	4.02714	1.03992	0.0299671	0.249854	0.0461013	0.249854
Antp	2.75e-08	3.14e-07	-0.617652	0.111157	5.24577	0.12839	0.00592367	0.0208567	0.0311441	0.0311441
CG42568	2.77e-08	3.15e-07	-0.814632	0.146633	4.64509	0.234346	0.0262964	0.0323964	0.0382074	0.0382074
ac	2.82e-08	3.21e-07	-2.15608	0.388341	1.30345	1.42269	0.256207	-0.0858578	0.196219	0.196219
LManV	2.84e-08	3.23e-07	3.98308	0.717557	3.81497	5.73103	0.113397	1.43127	0.0497116	1.43127
P5CDh2	2.85e-08	3.24e-07	1.12683	0.203018	3.37597	0.458701	0.0631075	0.0605417	0.0602707	0.0605417
MP1	2.87e-08	3.26e-07	0.465113	0.0838158	6.35305	0.0769542	0.00192529	0.0178252	0.01915	0.01915
Gpdh1	2.91e-08	3.29e-07	0.343906	0.0619987	9.23146	0.0394217	0.00011217	0.00777032	0.0114193	0.0114193
Tm2	3.07e-08	3.48e-07	-0.358554	0.0647529	8.76374	0.0464973	0.000184493	0.0123943	0.0105096	0.0123943
CG6793	3.1e-08	3.51e-07	-2.33205	0.421274	1.27654	1.96723	0.16677	0.365647	0.199543	0.365647
Con	3.11e-08	3.52e-07	-0.615038	0.111116	5.22551	0.121231	0.00565363	0.0142191	0.0313865	0.0313865
CRMP	3.2e-08	3.62e-07	0.476494	0.0861653	6.6211	0.0821702	0.00146257	0.0208108	0.016145	0.0208108
TRAM	3.22e-08	3.64e-07	0.36546	0.0661015	8.16549	0.0483424	0.000293475	0.0128148	0.0102261	0.0128148
garz	3.27e-08	3.68e-07	0.555052	0.100437	7.92746	0.111534	0.000345716	0.0299169	0.0103902	0.0299169
CG13071	3.29e-08	3.7e-07	-1.2432	0.225001	3.16668	0.559581	0.0688321	0.0830443	0.0668709	0.0830443
Lk	3.31e-08	3.72e-07	-1.11336	0.201538	4.49758	0.41453	0.0819424	0.00216864	0.0399099	0.0399099
CG18095	3.35e-08	3.76e-07	0.618948	0.112083	5.17275	0.137368	0.00566889	0.0305067	0.0320192	0.0320192
qin	3.43e-08	3.85e-07	0.458811	0.083148	6.81641	0.0762664	0.00121815	0.0195226	0.0142532	0.0195226
Qsox4	3.46e-08	3.88e-07	-1.95305	0.354057	1.57114	1.37683	0.209854	0.160341	0.166216	0.166216
ttk	3.49e-08	3.91e-07	0.375651	0.0681163	8.86163	0.0511397	0.000178208	0.0137413	0.0106461	0.0137413
GCS2alpha	3.5e-08	3.92e-07	0.476752	0.0864565	9.26613	0.0823744	0.000100204	0.022324	0.0115141	0.022324
CG14245	3.51e-08	3.93e-07	1.63583	0.296678	6.6244	0.969849	0.00279672	0.261257	0.0161097	0.261257
CG14591	3.55e-08	3.96e-07	-0.489484	0.0888012	6.12525	0.0750258	0.00222665	0.00842325	0.0214303	0.0214303
SCAR	3.57e-08	3.98e-07	0.326687	0.0592818	8.18134	0.038183	0.000322548	0.00966134	0.0102204	0.0102204
CG8245	3.57e-08	3.98e-07	-0.654297	0.118728	4.87955	0.135007	0.00677373	0.0133025	0.035515	0.035515
CG18179	3.62e-08	4.03e-07	2.0276	0.368087	5.09059	1.49074	0.0111464	0.395317	0.0330054	0.395317
beat-Ia	3.64e-08	4.05e-07	-0.893326	0.1622	3.74067	0.241729	0.0277582	-0.00126633	0.0511684	0.0511684
CG5961	3.64e-08	4.05e-07	-0.355178	0.0644917	7.28037	0.0400196	0.000751865	0.00542423	0.0117257	0.0117257
Tnpo	3.67e-08	4.08e-07	0.336999	0.0612079	9.11747	0.0406761	0.000103577	0.0105696	0.0111357	0.0111357
Teh1	3.69e-08	4.1e-07	-0.771958	0.14023	4.21258	0.18497	0.0155475	0.009144	0.0434462	0.0434462
Sccpdh1	3.72e-08	4.12e-07	0.324936	0.0590408	8.49541	0.0335556	0.000190512	0.00504556	0.0102669	0.0102669
CG15385	3.73e-08	4.13e-07	0.632107	0.114865	5.2987	0.144954	0.00532862	0.0342532	0.030512	0.0342532
Sema2b	3.79e-08	4.19e-07	0.646082	0.117457	5.44824	0.151468	0.0041736	0.0372148	0.028744	0.0372148
ClC-b	3.83e-08	4.23e-07	0.336785	0.0612489	7.62933	0.0400943	0.000518565	0.00955797	0.0107357	0.0107357
S1P	3.91e-08	4.32e-07	0.421112	0.0766372	6.62255	0.0510276	0.00149028	0.00143939	0.0161295	0.0161295
IRSp53	3.93e-08	4.33e-07	-0.52958	0.0963926	5.77943	0.0956225	0.00288402	0.0181644	0.0249906	0.0249906
beat-IIb	3.93e-08	4.33e-07	-0.814793	0.148309	4.00667	0.198902	0.0195672	5.89e-05	0.0464193	0.0464193
CG1674	3.97e-08	4.37e-07	-0.522156	0.0950703	7.92488	0.0990084	0.000470662	0.0266444	0.0103922	0.0266444
kug	3.99e-08	4.38e-07	0.383062	0.0697554	8.29624	0.0532895	0.000256931	0.0143405	0.0102039	0.0143405
CG10182	3.99e-08	4.39e-07	2.78498	0.507164	3.41724	2.8168	0.0899819	0.681665	0.0590823	0.681665
Phk-3	4.04e-08	4.43e-07	0.637379	0.116116	5.10148	0.136978	0.00757423	0.0212261	0.0328747	0.0328747
lig	4.05e-08	4.44e-07	0.562608	0.102504	9.86962	0.114982	5.71e-05	0.0314643	0.0138873	0.0314643
CG14073	4.09e-08	4.49e-07	0.4273	0.0778788	8.43143	0.0663373	0.000224342	0.017971	0.010235	0.017971
CG13685	4.12e-08	4.51e-07	-0.689095	0.125619	4.65971	0.164159	0.00930017	0.0288194	0.0380403	0.0380403
CG13631	4.13e-08	4.52e-07	-0.497135	0.090635	6.5262	0.0898063	0.00147417	0.0231699	0.0171918	0.0231699
CG12822	4.26e-08	4.65e-07	-0.340328	0.0621064	7.58862	0.037142	0.000754469	0.0053548	0.0108172	0.0108172
VhaM9.7-a	4.35e-08	4.75e-07	-0.698606	0.127575	4.64529	0.155197	0.010621	0.0136802	0.0382051	0.0382051
sim	4.41e-08	4.81e-07	0.785373	0.143483	6.83525	0.224369	0.00105242	0.0607098	0.0140968	0.0607098
CG13086	4.47e-08	4.87e-07	0.690208	0.126155	4.59612	0.1648	0.00897687	0.0293866	0.0387684	0.0387684
beat-IIa	4.49e-08	4.89e-07	-0.668875	0.12227	4.85547	0.145386	0.00905456	0.0166524	0.035795	0.035795
Gart	4.5e-08	4.89e-07	0.509857	0.0932074	8.92369	0.0945901	0.000328875	0.025734	0.0107469	0.025734
eIF4G2	4.53e-08	4.92e-07	0.322707	0.059007	8.4651	0.0337832	0.000194951	0.00572464	0.0102505	0.0102505
Sap47	4.54e-08	4.93e-07	-0.32378	0.0592098	8.52393	0.0375311	0.000232906	0.0096012	0.0102845	0.0102845
Dap160	4.57e-08	4.95e-07	0.459634	0.0840674	7.96802	0.0768917	0.000362341	0.0208396	0.0103591	0.0208396
CG32850	4.57e-08	4.95e-07	-0.350794	0.0641608	7.33164	0.0444875	0.000805045	0.0112143	0.0115448	0.0115448
CG6280	4.59e-08	4.97e-07	-1.5007	0.274522	2.49209	0.695762	0.129891	-0.0401872	0.0961963	0.0961963
Non1	4.59e-08	4.97e-07	-0.384894	0.0704112	10.0373	0.0509439	4.19e-05	0.0115534	0.0148313	0.0148313
CG6329	4.67e-08	5.05e-07	-0.479104	0.0876939	6.1015	0.072636	0.0014099	0.00962763	0.0216608	0.0216608
CG18327	4.76e-08	5.14e-07	-0.881247	0.1614	4.54859	0.282845	0.0122258	0.0659245	0.0393163	0.0659245
Pph13	5e-08	5.39e-07	-0.80673	0.147991	4.02358	0.196821	0.0195475	0.00171151	0.0461562	0.0461562
Vps13B	5.06e-08	5.46e-07	0.404827	0.0742932	6.65876	0.0529267	0.000810841	0.00824314	0.0157476	0.0157476
Syx8	5.21e-08	5.61e-07	-0.404423	0.074287	6.70787	0.0573684	0.00130555	0.0127323	0.0152501	0.0152501
CG5009	5.25e-08	5.65e-07	0.391237	0.0718859	7.30448	0.0558388	0.000684978	0.0148178	0.011639	0.0148178
Def	5.28e-08	5.68e-07	1.14265	0.209988	5.92262	0.476346	0.00310924	0.129176	0.023465	0.129176
TwdlG	5.35e-08	5.74e-07	-1.00272	0.184348	4.05446	0.366898	0.0250048	0.0769474	0.0456854	0.0769474
Nna1	5.48e-08	5.88e-07	-0.567185	0.104358	6.97749	0.117438	0.00100862	0.0316629	0.0131033	0.0316629
His4r	5.5e-08	5.9e-07	-0.40052	0.0737026	9.36191	0.0585646	9.86e-05	0.0161976	0.0117973	0.0161976
DopEcR	5.56e-08	5.95e-07	-0.486559	0.0895637	6.09393	0.0799575	0.00233027	0.0146011	0.0217347	0.0217347
Dis3l2	5.58e-08	5.96e-07	0.359476	0.0661785	8.35597	0.0471869	0.000197021	0.0129418	0.0102112	0.0129418
lncRNA:CR45251	5.77e-08	6.16e-07	-1.13841	0.209811	3.03148	0.434285	0.0603725	0.0285504	0.0716892	0.0716892
Cirl	5.86e-08	6.25e-07	0.49212	0.0907466	8.39396	0.0885086	0.000281933	0.0244229	0.0102212	0.0244229
CG42711	5.86e-08	6.25e-07	1.0509	0.193783	3.59335	0.403614	0.037605	0.075051	0.0544318	0.075051
Sidpn	5.87e-08	6.26e-07	-0.763174	0.140739	4.1584	0.183457	0.0152384	0.0118333	0.0441842	0.0441842
Wnt4	5.92e-08	6.31e-07	-0.954356	0.176046	4.06486	0.332922	0.0195163	0.0734597	0.0455294	0.0734597
eag	6.06e-08	6.45e-07	-0.581121	0.107279	5.54051	0.123488	0.00466117	0.0298655	0.0276719	0.0298655
Srpk79D	6.09e-08	6.47e-07	-0.496232	0.0916216	6.3943	0.0900522	0.00173503	0.0234485	0.0186895	0.0234485
CG13995	6.12e-08	6.5e-07	-0.704564	0.13011	4.52651	0.155867	0.0112134	0.0113171	0.0395724	0.0395724
C1GalTA	6.22e-08	6.6e-07	0.324302	0.0599202	7.8622	0.0337568	0.000328523	0.00525231	0.0104428	0.0104428
Jon99Fi	6.29e-08	6.66e-07	-2.05265	0.379384	6.82023	1.54165	0.00253847	0.429259	0.014221	0.429259
ftz-f1	6.55e-08	6.94e-07	0.347211	0.0642627	9.12946	0.0441415	0.000136237	0.0122529	0.0111635	0.0122529
didum	6.56e-08	6.94e-07	0.399268	0.0738993	8.77783	0.0583707	0.000164345	0.016219	0.0105275	0.016219
CG17732	6.6e-08	6.97e-07	-0.895159	0.165716	3.75083	0.293435	0.0279269	0.0544583	0.0509624	0.0544583
CG9812	6.6e-08	6.97e-07	-0.440294	0.0815105	7.49187	0.0709904	0.000664144	0.0192678	0.0110572	0.0192678
CG13559	6.67e-08	7.04e-07	1.53923	0.285057	2.53823	0.801701	0.150051	0.021056	0.0937212	0.0937212
CG31200	6.79e-08	7.15e-07	-0.559749	0.103721	5.92803	0.114791	0.00294239	0.0293318	0.0234088	0.0293318
Upf2	6.89e-08	7.26e-07	0.410827	0.0761638	7.75414	0.0618513	0.00048013	0.0169226	0.0105502	0.0169226
Dcr-2	6.9e-08	7.26e-07	0.54713	0.101437	8.15115	0.109703	0.000292718	0.0305756	0.010232	0.0305756
alpha-Catr	6.94e-08	7.29e-07	-0.668354	0.123936	4.75323	0.130769	0.00910865	0.000728437	0.036972	0.036972
asRNA:CR46269	7.02e-08	7.37e-07	-1.3696	0.254065	3.58121	0.687627	0.076106	0.117541	0.0547258	0.117541
CG18577	7.03e-08	7.37e-07	1.44743	0.268518	3.71582	0.768019	0.0317159	0.18459	0.0516821	0.18459
CG12994	7.04e-08	7.37e-07	-0.948226	0.175915	3.45924	0.268706	0.0349292	-0.00909203	0.0579087	0.0579087
CG34402	7.05e-08	7.38e-07	-0.871836	0.161752	3.90577	0.278655	0.0240405	0.0544506	0.0480763	0.0544506
ATP7	7.12e-08	7.45e-07	0.370109	0.0686891	7.88267	0.0502263	0.000355967	0.0137986	0.0104257	0.0137986
CG3257	7.16e-08	7.48e-07	-0.578929	0.107463	5.34988	0.0985926	0.00474171	0.00316236	0.0299034	0.0299034
Stacl	7.41e-08	7.74e-07	-0.477166	0.0886784	7.7249	0.0835435	0.0013284	0.0222631	0.0105864	0.0222631
Tace	7.46e-08	7.78e-07	-0.700264	0.130168	4.53921	0.164409	0.011406	0.0223326	0.0394249	0.0394249
na	7.49e-08	7.8e-07	-0.540995	0.100573	5.60327	0.0891755	0.00339179	0.00689866	0.0269531	0.0269531
CG42784	7.54e-08	7.85e-07	-0.474521	0.0882371	6.23529	0.0774204	0.00297273	0.0146387	0.0203846	0.0203846
CG14275	8.01e-08	8.33e-07	-0.53425	0.0995444	5.97316	0.104867	0.00266199	0.0270653	0.0229434	0.0270653
OtopLa	8.07e-08	8.39e-07	-0.419035	0.0780961	6.53792	0.062492	0.00123708	0.014827	0.0170599	0.0170599
CG9338	8.2e-08	8.52e-07	-0.546406	0.101891	6.84301	0.109739	0.00167468	0.0294706	0.014034	0.0294706
CG8852	8.24e-08	8.56e-07	-0.666741	0.124352	4.74474	0.140019	0.00932139	0.0113362	0.0370691	0.0370691
CG33543	8.31e-08	8.61e-07	-0.632552	0.118007	4.89309	0.119085	0.00642001	0.00453747	0.0353569	0.0353569
CG10654	8.36e-08	8.66e-07	-0.477387	0.0890793	7.13186	0.0837954	0.000908944	0.0228964	0.0123291	0.0228964
drm	8.4e-08	8.69e-07	-0.566944	0.105807	5.45355	0.110628	0.0049034	0.02036	0.0286818	0.0286818
tutl	8.46e-08	8.75e-07	-0.442193	0.0825446	6.36178	0.0694673	0.00138755	0.0163661	0.0190533	0.0190533
Gp93	8.66e-08	8.94e-07	0.344851	0.0644234	9.53057	0.041444	7.49e-05	0.00983684	0.0123762	0.0123762
CG2258	8.75e-08	9.04e-07	0.326213	0.0609647	7.64208	0.032592	0.000437471	0.00348926	0.0107126	0.0107126
CG11125	8.78e-08	9.05e-07	-0.419647	0.0784329	6.55798	0.057611	0.00161964	0.00892139	0.0168355	0.0168355
Slc45-1	8.78e-08	9.05e-07	0.704547	0.131683	6.17977	0.18267	0.0027176	0.0493038	0.0209097	0.0493038
Baldspot	8.9e-08	9.16e-07	0.317077	0.0592899	8.63125	0.0327087	0.000178478	0.00563979	0.0103674	0.0103674
CG10680	8.91e-08	9.16e-07	1.06382	0.198931	6.58027	0.416575	0.00175857	0.116963	0.0165887	0.116963
CG13375	9.08e-08	9.33e-07	0.701401	0.131245	4.38065	0.17788	0.0103703	0.0377086	0.0413054	0.0413054
nSyb	9.11e-08	9.36e-07	-0.389613	0.0729121	6.91412	0.0558983	0.00108768	0.0148608	0.0135031	0.0148608
Snap25	9.25e-08	9.49e-07	-0.466984	0.0874351	6.18666	0.0790061	0.00208998	0.0193946	0.0208447	0.0208447
lncRNA:CR43857	9.27e-08	9.5e-07	-0.827174	0.154885	4.87035	0.25203	0.00688983	0.0650785	0.0356222	0.0650785
lncRNA:CR44442	9.35e-08	9.58e-07	-1.17056	0.219251	2.98062	0.467879	0.0705883	0.0330154	0.0736248	0.0736248
CG1888	9.43e-08	9.65e-07	-0.451767	0.0846418	7.66189	0.0752006	0.000940701	0.020552	0.0106788	0.020552
wcy	9.51e-08	9.72e-07	0.385833	0.0723087	8.9901	0.0548598	0.000115722	0.0155699	0.0108673	0.0155699
inaF-B	9.54e-08	9.74e-07	-0.511753	0.0959187	6.71454	0.0965167	0.00523695	0.0223643	0.0151845	0.0223643
dpr9	9.57e-08	9.77e-07	-0.627725	0.117669	4.90455	0.128955	0.00631516	0.0173243	0.0352227	0.0352227
CG17475	9.62e-08	9.8e-07	-2.53046	0.474419	5.6237	2.36017	0.00993867	0.665281	0.0267212	0.665281
CG11147	9.65e-08	9.83e-07	0.664822	0.124656	7.1172	0.162922	0.000916971	0.0457004	0.0123956	0.0457004
CG3625	9.69e-08	9.86e-07	0.556109	0.104289	7.02495	0.114006	0.00147531	0.0311535	0.0128468	0.0311535
CG44247	9.7e-08	9.86e-07	-0.54489	0.102188	5.54602	0.0994663	0.00371878	0.0166227	0.0276084	0.0276084
lncRNA:CR42715	9.77e-08	9.92e-07	2.03233	0.381232	1.3061	1.45247	0.240118	0.118485	0.195895	0.195895
dati	9.79e-08	9.94e-07	0.626749	0.117578	6.39259	0.144834	0.00229723	0.0391764	0.0187087	0.0391764
CG44085	9.99e-08	1.01e-06	-0.508786	0.0955121	8.03292	0.0954789	0.000359711	0.027008	0.0103081	0.027008
Aplip1	1e-07	1.01e-06	-0.598576	0.112375	5.20055	0.12138	0.00619854	0.0198317	0.0316858	0.0316858
CG32276	1.01e-07	1.02e-06	0.31946	0.0599876	8.86435	0.0351672	0.000145249	0.00792231	0.0106503	0.0106503
lncRNA:CR44725	1.01e-07	1.02e-06	1.92759	0.362019	1.30735	1.37078	0.185021	0.208152	0.195742	0.208152
Oatp74D	1.01e-07	1.02e-06	0.588339	0.110499	5.82795	0.127703	0.00325316	0.033377	0.0244661	0.033377
hig	1.02e-07	1.02e-06	-0.443891	0.0833753	6.49796	0.0726965	0.00147591	0.0193784	0.0175114	0.0193784
CG13578	1.02e-07	1.03e-06	-1.04106	0.19555	3.15051	0.365656	0.047296	0.0297863	0.0674234	0.0674234
Buffy	1.02e-07	1.03e-06	-0.689144	0.129465	5.36985	0.175236	0.00533015	0.0449537	0.0296669	0.0449537
sog	1.04e-07	1.05e-06	-0.426496	0.080175	6.59748	0.0671398	0.00129465	0.0179894	0.0164003	0.0179894
CG12817	1.06e-07	1.06e-06	-1.25105	0.235304	2.79966	0.512555	0.0850029	0.00927333	0.0811016	0.0811016
CG15068	1.06e-07	1.07e-06	-0.965375	0.181602	5.31311	0.344112	0.00501773	0.0939203	0.0303403	0.0939203
CG6767	1.06e-07	1.07e-06	0.333982	0.0628293	9.34723	0.0331006	9.08e-05	0.00285662	0.0117518	0.0117518
CG42361	1.07e-07	1.07e-06	-0.679567	0.12786	4.66819	0.16037	0.0111007	0.0267626	0.0379434	0.0379434
CG3009	1.08e-07	1.09e-06	-0.738548	0.139028	5.35215	0.201475	0.0089354	0.0490512	0.0298765	0.0490512
Drs	1.1e-07	1.1e-06	-0.749325	0.141125	9.12039	0.207451	0.000131892	0.0596171	0.0111424	0.0596171
CG7330	1.11e-07	1.11e-06	1.19859	0.225806	3.13517	0.530863	0.0573886	0.0955759	0.0679529	0.0955759
CG6656	1.19e-07	1.19e-06	-0.459384	0.0867505	6.23094	0.0678951	0.00215005	0.00922446	0.0204269	0.0204269
Cngl	1.19e-07	1.19e-06	-0.477364	0.0901529	6.11437	0.0836005	0.00284705	0.0207505	0.0215356	0.0215356
asRNA:CR44969	1.19e-07	1.19e-06	-1.21534	0.229549	3.76139	0.546537	0.102735	0.0553434	0.0507505	0.0553434
Trissin	1.21e-07	1.21e-06	-1.01063	0.190967	3.62352	0.378014	0.0312499	0.0781549	0.0537185	0.0781549
LysD	1.24e-07	1.24e-06	-1.65912	0.313805	3.57491	1.01929	0.0489375	0.246483	0.0548801	0.246483
Ir47a	1.27e-07	1.26e-06	-1.08906	0.206119	3.16206	0.406198	0.060427	0.0305765	0.0670281	0.0670281
zfh1	1.28e-07	1.28e-06	0.461404	0.0873644	8.01506	0.0788779	0.000470347	0.0224272	0.0103226	0.0224272
CG4364	1.28e-07	1.28e-06	-0.426271	0.0807134	9.42713	0.0673236	8.38e-05	0.0194601	0.0120087	0.0194601
lncRNA:CR45361	1.3e-07	1.3e-06	-1.525	0.28892	2.29644	0.861916	0.138952	0.111471	0.107618	0.111471
yl	1.33e-07	1.32e-06	0.478852	0.0907776	11.0654	0.0832232	1.48e-05	0.0227411	0.0247069	0.0247069
Six4	1.37e-07	1.36e-06	-0.691315	0.131204	6.3898	0.17729	0.00201943	0.0496241	0.0187401	0.0496241
lncRNA:CR32218	1.37e-07	1.36e-06	0.572582	0.108672	5.29353	0.108027	0.00485496	0.0156199	0.0305736	0.0305736
ck	1.39e-07	1.38e-06	0.642662	0.122036	7.7288	0.153257	0.000437378	0.0442408	0.0105813	0.0442408
alpha-Est7	1.39e-07	1.38e-06	0.49006	0.0930567	7.00641	0.0891149	0.000943226	0.0250354	0.0129446	0.0250354
Pdi	1.42e-07	1.41e-06	0.380873	0.0723775	10.1689	0.0533921	3.93e-05	0.0151728	0.0156762	0.0156762
mtgo	1.44e-07	1.43e-06	0.350308	0.0666036	8.44425	0.0455661	0.000268815	0.0130393	0.0102406	0.0130393
Dg	1.46e-07	1.44e-06	0.371772	0.0707045	8.0504	0.0513288	0.000362813	0.0146346	0.0102937	0.0146346
CG1607	1.47e-07	1.45e-06	0.461491	0.0877931	6.16954	0.0721076	0.00211642	0.0133098	0.0210064	0.0210064
CG11211	1.5e-07	1.47e-06	-1.00392	0.191112	5.33928	0.37448	0.00601101	0.103561	0.0300292	0.103561
CG4497	1.5e-07	1.48e-06	0.354167	0.0674316	7.965	0.0466104	0.000380364	0.0132607	0.0103615	0.0132607
nau	1.52e-07	1.49e-06	-0.966594	0.184092	3.43801	0.342099	0.0431722	0.0528457	0.0584975	0.0584975
Cp7Fb	1.53e-07	1.51e-06	0.753347	0.143539	9.69321	0.210972	0.000121197	0.0616889	0.0130394	0.0616889
Sply	1.56e-07	1.53e-06	0.352037	0.0671199	8.30243	0.0460856	0.000255002	0.0132603	0.0102041	0.0132603
CG6277	1.57e-07	1.54e-06	1.40971	0.268836	5.30376	0.739097	0.00692376	0.209894	0.0304517	0.209894
E2f1	1.6e-07	1.57e-06	0.315522	0.060211	8.92566	0.033543	0.000125835	0.00690531	0.0107503	0.0107503
AOX3	1.6e-07	1.57e-06	0.391981	0.0748029	8.49852	0.0571647	0.000192407	0.016594	0.0102688	0.016594
NimB3	1.61e-07	1.58e-06	1.20846	0.230655	4.1504	0.543379	0.0224207	0.137185	0.0442956	0.137185
CG13531	1.63e-07	1.6e-06	0.486538	0.0929091	7.7355	0.0881019	0.00051453	0.0253817	0.0105728	0.0253817
tef	1.65e-07	1.61e-06	0.337123	0.0643963	7.95323	0.0423056	0.000403175	0.0120375	0.0103704	0.0120375
Alg9	1.66e-07	1.62e-06	0.315912	0.0603537	7.7843	0.0353256	0.000411202	0.00850677	0.0105165	0.0105165
CG15414	1.68e-07	1.63e-06	-0.972623	0.185896	3.38203	0.301434	0.0435782	0.00420052	0.060094	0.060094
Mlc1	1.68e-07	1.63e-06	-0.395479	0.0755913	8.53441	0.0582392	0.000201327	0.0169408	0.0102914	0.0169408
CG11857	1.69e-07	1.64e-06	0.309055	0.0590858	8.35429	0.0317553	0.000262494	0.0060138	0.0102109	0.0102109
ed	1.69e-07	1.65e-06	0.309629	0.0592007	8.62995	0.0344807	0.000147916	0.00901983	0.0103663	0.0103663
CG5177	1.69e-07	1.65e-06	-0.390878	0.074737	7.53579	0.0569023	0.00054061	0.0162162	0.010942	0.0162162
CG14445	1.72e-07	1.67e-06	-0.646688	0.123712	4.76265	0.136972	0.00904954	0.0161577	0.0368642	0.0368642
Snmp1	1.73e-07	1.68e-06	-0.574006	0.109842	5.26648	0.104663	0.00529927	0.0109853	0.0308964	0.0308964
CG43740	1.74e-07	1.69e-06	-0.652214	0.124828	4.80935	0.15851	0.008834	0.0379123	0.0363281	0.0379123
CG3841	1.75e-07	1.69e-06	2.56981	0.491888	3.59492	2.46094	0.079343	0.646518	0.054394	0.646518
dpr20	1.78e-07	1.72e-06	-0.714015	0.136761	4.36349	0.167356	0.0145948	0.0165519	0.0415156	0.0415156
PlexA	1.81e-07	1.75e-06	0.468769	0.0898311	9.21548	0.0819384	0.000112817	0.024096	0.011377	0.024096
CG4825	1.82e-07	1.76e-06	0.366328	0.0702246	8.25056	0.0500485	0.000265002	0.0145295	0.0102054	0.0145295
CG10365	1.83e-07	1.77e-06	-0.385167	0.0738471	7.62011	0.055333	0.000561874	0.0157983	0.0107531	0.0157983
CG17350	1.89e-07	1.82e-06	-0.773907	0.148547	3.98743	0.172091	0.0194747	-0.00985407	0.0467236	0.0467236
CG17278	1.91e-07	1.84e-06	-0.492049	0.0944756	5.90265	0.0784342	0.00310321	0.0105408	0.0236737	0.0236737
St4	1.93e-07	1.85e-06	0.89982	0.17283	6.95132	0.302285	0.00119236	0.0884182	0.0132596	0.0884182
par-6	1.94e-07	1.87e-06	0.368401	0.070781	8.17311	0.0506779	0.00026575	0.0147641	0.0102233	0.0147641
CG45105	1.96e-07	1.88e-06	-0.783333	0.15055	3.92722	0.197002	0.0202851	0.0123337	0.0477109	0.0477109
Abl	1.98e-07	1.9e-06	0.318179	0.0611711	8.4726	0.0378156	0.000174806	0.0110509	0.0102544	0.0110509
CG32271	1.98e-07	1.9e-06	-0.949251	0.182493	3.39177	0.332469	0.0400992	0.0552929	0.0598116	0.0598116
CG4045	1.99e-07	1.91e-06	-0.354731	0.0682196	7.22191	0.0470108	0.00068966	0.0132721	0.0119484	0.0132721
ScpX	2.02e-07	1.94e-06	0.309771	0.0596013	8.02102	0.0296915	0.000339167	0.00353411	0.0103178	0.0103178
CG9547	2.06e-07	1.98e-06	0.321493	0.061903	7.51514	0.0344555	0.000500683	0.00639297	0.0109953	0.0109953
CG11891	2.08e-07	1.99e-06	0.487087	0.0938109	6.11035	0.0857661	0.00482686	0.0183397	0.0215746	0.0215746
pio	2.08e-07	1.99e-06	-0.36337	0.0699875	6.90751	0.0452083	0.00114593	0.00897188	0.0135488	0.0135488
Gp210	2.1e-07	2e-06	0.525023	0.101151	8.73952	0.103081	0.000199298	0.0304952	0.0104799	0.0304952
CG14661	2.11e-07	2.02e-06	0.517737	0.0997753	7.34086	0.100255	0.000644128	0.0292212	0.0115136	0.0292212
hob	2.13e-07	2.03e-06	0.518965	0.100042	7.98323	0.100748	0.000381345	0.029644	0.0103475	0.029644
Ten-m	2.13e-07	2.03e-06	0.47359	0.0912981	7.42965	0.083902	0.000688951	0.0243171	0.0112334	0.0243171
CG31140	2.15e-07	2.04e-06	-0.481287	0.0928015	6.38206	0.0866615	0.00201055	0.0238258	0.018827	0.0238258
CG3630	2.15e-07	2.05e-06	-0.309902	0.0597601	7.96743	0.0289702	0.000354209	0.00270132	0.0103596	0.0103596
mop	2.17e-07	2.06e-06	0.529862	0.102203	8.65123	0.105057	0.000180841	0.0311555	0.0103858	0.0311555
meru	2.17e-07	2.06e-06	-1.03357	0.199386	3.23635	0.326633	0.0547013	-0.0158859	0.0645632	0.0645632
yin	2.18e-07	2.07e-06	0.349339	0.0673973	9.80766	0.0369938	5.38e-05	0.00402802	0.0135734	0.0135734
CG7675	2.19e-07	2.08e-06	0.656767	0.126736	6.74907	0.161444	0.00128447	0.0469012	0.0148536	0.0469012
Hml	2.2e-07	2.09e-06	1.1628	0.224427	6.26826	0.506119	0.00221245	0.14889	0.0200551	0.14889
Capr	2.24e-07	2.12e-06	0.391689	0.0756476	9.96611	0.0574489	4.23e-05	0.0171253	0.0144131	0.0171253
CG4660	2.25e-07	2.13e-06	-0.642022	0.124003	4.73377	0.144442	0.00893564	0.0262933	0.0371945	0.0371945
Hr39	2.25e-07	2.13e-06	0.312168	0.060299	7.84979	0.0346444	0.000454414	0.00841989	0.0104535	0.0104535
Snx1	2.26e-07	2.13e-06	0.307981	0.0594961	8.03779	0.0329349	0.000315278	0.00745739	0.0103041	0.0103041
CG5290	2.28e-07	2.15e-06	0.335239	0.064779	7.23807	0.0347121	0.000703935	0.00376377	0.011885	0.011885
SiaT	2.29e-07	2.16e-06	-0.787148	0.152133	3.96846	0.231203	0.0224044	0.0460387	0.0470287	0.0470287
hang	2.33e-07	2.19e-06	0.436694	0.0844501	9.18705	0.07146	0.000109069	0.0212864	0.0113038	0.0212864
CG5778	2.33e-07	2.19e-06	0.788512	0.152495	7.40551	0.232991	0.000783406	0.068981	0.0113062	0.068981
spoon	2.34e-07	2.2e-06	0.333737	0.0645487	9.54475	0.0333089	6.98e-05	0.00315586	0.0124298	0.0124298
frma	2.35e-07	2.2e-06	0.903452	0.174767	5.85065	0.305908	0.00397815	0.0876527	0.0242233	0.0876527
Taldo	2.35e-07	2.21e-06	0.424342	0.0820904	9.16102	0.0674875	0.00011602	0.0201005	0.0112391	0.0201005
Cdk5alpha	2.38e-07	2.23e-06	-0.54552	0.105576	5.45103	0.102336	0.00472741	0.018564	0.0287112	0.0287112
lncRNA:CR45197	2.38e-07	2.23e-06	-5.25983	1.01792	3.58456	10.3711	0.30772	2.80074	0.0546444	2.80074
CG10804	2.44e-07	2.29e-06	-0.627373	0.121533	4.84917	0.124232	0.00844299	0.0101337	0.0358681	0.0358681
Rbcn-3A	2.46e-07	2.31e-06	0.650008	0.125962	8.76981	0.158502	0.000167819	0.0474313	0.0105172	0.0474313
lncRNA:CR44754	2.47e-07	2.31e-06	-0.841032	0.162996	5.02074	0.265367	0.0068129	0.0728899	0.0338428	0.0728899
CG5281	2.59e-07	2.42e-06	-0.652724	0.126717	4.67777	0.139617	0.0103374	0.0154271	0.037834	0.037834
CG6184	2.62e-07	2.44e-06	-0.654492	0.127111	4.6321	0.13089	0.0101156	0.00535544	0.0383559	0.0383559
Vago	2.63e-07	2.45e-06	0.923203	0.179331	4.80286	0.320154	0.0112822	0.0851961	0.0364027	0.0851961
CG7589	2.66e-07	2.48e-06	-0.693599	0.134787	5.96795	0.180751	0.00287175	0.0516307	0.0229967	0.0516307
Pink1	2.7e-07	2.51e-06	-0.310553	0.0603792	8.95489	0.0278602	0.000135106	0.00157818	0.0108018	0.0108018
atilla	2.73e-07	2.53e-06	-0.437114	0.0850166	7.42919	0.0718218	0.000739947	0.0209435	0.0112348	0.0209435
CG16779	2.74e-07	2.54e-06	-0.493569	0.0960132	6.03901	0.0915807	0.0027758	0.0248798	0.0222775	0.0248798
CG32392	2.76e-07	2.57e-06	-0.864554	0.168235	3.55603	0.240158	0.0295598	0.0103777	0.0553492	0.0553492
Tsp42El	2.78e-07	2.58e-06	-0.523553	0.101896	5.56942	0.08813	0.00380903	0.0109017	0.0273396	0.0273396
CG6928	2.9e-07	2.69e-06	0.506028	0.0986483	7.22275	0.0963761	0.00070444	0.02849	0.0119451	0.02849
CG6910	2.93e-07	2.72e-06	0.422517	0.0824004	7.31024	0.067205	0.00070095	0.0196685	0.0116187	0.0196685
fus	2.95e-07	2.73e-06	0.303725	0.059242	8.4919	0.0345274	0.000263929	0.0100415	0.0102649	0.0102649
Spn31A	2.95e-07	2.73e-06	-0.626144	0.122135	4.84046	0.130613	0.00878187	0.0172759	0.0359689	0.0359689
fok	2.96e-07	2.73e-06	-0.556372	0.108534	8.73678	0.116549	0.00013672	0.0352019	0.0104767	0.0352019
Pgant6	3e-07	2.77e-06	0.366674	0.07157	8.10501	0.0506379	0.000311405	0.0150554	0.0102557	0.0150554
CG13229	3.06e-07	2.83e-06	-0.859822	0.16795	3.71048	0.24278	0.0328269	0.0124429	0.0517943	0.0517943
CG8745	3.07e-07	2.83e-06	-0.769339	0.150292	6.83378	0.223025	0.00117694	0.0665863	0.0141088	0.0665863
CG41099	3.08e-07	2.84e-06	0.40584	0.0792934	9.0878	0.0620675	0.000119522	0.0187428	0.0110686	0.0187428
P5CDh1	3.09e-07	2.85e-06	0.304075	0.0594167	8.65785	0.0333393	0.000198939	0.00873577	0.0103921	0.0103921
CG10132	3.16e-07	2.91e-06	-0.551853	0.107919	5.31964	0.103662	0.00467669	0.0179893	0.0302627	0.0302627
CG9626	3.21e-07	2.95e-06	-0.872634	0.170756	6.81881	0.2872	0.00123061	0.0862424	0.014233	0.0862424
CG4022	3.3e-07	3.03e-06	0.316002	0.0618962	7.55065	0.0311857	0.000588704	0.00375846	0.0109047	0.0109047
exu	3.3e-07	3.03e-06	0.368383	0.0721589	10.1537	0.0447302	4.69e-05	0.00844443	0.0155738	0.0155738
CG7296	3.37e-07	3.09e-06	0.434837	0.0852333	6.39942	0.0713811	0.00217008	0.0196241	0.0186317	0.0196241
CG16974	3.43e-07	3.13e-06	0.338957	0.066483	9.12676	0.0433886	0.000120698	0.0131393	0.0111572	0.0131393
Spn	3.42e-07	3.13e-06	0.316887	0.0621525	9.25873	0.0340078	9.53e-05	0.00718816	0.0114935	0.0114935
CG15358	3.42e-07	3.13e-06	0.601788	0.118032	5.24666	0.136763	0.00705278	0.0347417	0.0311335	0.0347417
otp	3.47e-07	3.17e-06	-0.735233	0.144271	4.24788	0.18562	0.0194625	0.0225495	0.0429795	0.0429795
TrissinR	3.5e-07	3.2e-06	-0.591769	0.116164	5.02922	0.124321	0.00674094	0.0249549	0.0337413	0.0337413
CG13337	3.5e-07	3.2e-06	-1.71526	0.336716	2.22714	1.04109	0.228087	0.0344819	0.112047	0.112047
CG9813	3.53e-07	3.21e-06	-0.446199	0.0876118	6.78067	0.0752324	0.00128707	0.0217404	0.0145641	0.0217404
CG32052	3.55e-07	3.24e-06	-0.678664	0.133295	4.48321	0.140298	0.0132238	0.00292869	0.0400785	0.0400785
Atf6	3.56e-07	3.24e-06	0.344907	0.0677473	7.8529	0.0449613	0.000488479	0.0132806	0.0104508	0.0132806
bmm	3.58e-07	3.25e-06	0.301811	0.0592915	8.12619	0.0330838	0.00030258	0.00876261	0.0102439	0.0102439
rdgA	3.64e-07	3.31e-06	-0.516209	0.10148	7.55003	0.10076	0.000573005	0.0303217	0.0109062	0.0303217
lncRNA:CR43334	3.68e-07	3.34e-06	-0.768571	0.151152	5.96453	0.22341	0.0149913	0.0535498	0.0230318	0.0535498
lncRNA:CR43193	3.69e-07	3.34e-06	1.52018	0.298982	2.36097	0.667354	0.164492	-0.123684	0.103679	0.103679
CG9372	3.7e-07	3.36e-06	0.56123	0.110399	6.06201	0.119143	0.00255229	0.0340116	0.0220488	0.0340116
Pde6	3.74e-07	3.39e-06	-0.501222	0.0986351	6.27937	0.0950488	0.00186438	0.0273223	0.0199408	0.0273223
CG5653	3.76e-07	3.41e-06	-1.21817	0.239769	2.87004	0.528817	0.0943874	0.0421283	0.0780801	0.0780801
CG1814	3.77e-07	3.41e-06	-0.332576	0.0654659	7.20905	0.0356333	0.000857422	0.00515718	0.0119999	0.0119999
CG17786	3.79e-07	3.43e-06	0.586139	0.115402	5.10543	0.118248	0.00712574	0.0198791	0.0328274	0.0328274
CG7829	3.81e-07	3.44e-06	-0.992012	0.195344	5.35671	0.372459	0.00564722	0.108831	0.0298225	0.108831
CG9400	3.84e-07	3.47e-06	-0.687689	0.135461	4.37164	0.140724	0.0136333	-0.000711217	0.0414155	0.0414155
CG15553	3.97e-07	3.58e-06	1.04531	0.206164	4.02357	0.41392	0.0222643	0.105246	0.0461564	0.105246
CG3534	4e-07	3.61e-06	0.326465	0.0644057	7.27745	0.0348881	0.000707932	0.00569514	0.0117364	0.0117364
CG11413	4.12e-07	3.71e-06	-1.09551	0.216354	3.12904	0.371503	0.0722603	-0.0236481	0.0681665	0.0681665
twit	4.18e-07	3.75e-06	-0.618712	0.122256	4.8434	0.124994	0.0089048	0.0137471	0.0359349	0.0359349
CG6330	4.17e-07	3.75e-06	0.308984	0.0610541	7.6596	0.0352973	0.000500203	0.00968555	0.0106826	0.0106826
CG43333	4.18e-07	3.75e-06	0.866426	0.171209	7.11115	0.284678	0.000922351	0.0870152	0.0124235	0.0870152
tra2	4.21e-07	3.78e-06	0.311533	0.0615795	7.56617	0.0297706	0.000508612	0.00312323	0.0108675	0.0108675
CG30002	4.23e-07	3.79e-06	1.70415	0.336895	4.23356	1.10158	0.0255658	0.314928	0.0431676	0.314928
CG13594	4.23e-07	3.79e-06	-0.705187	0.139413	4.30265	0.175341	0.0160331	0.0276551	0.0422746	0.0422746
CCKLR-17D1	4.26e-07	3.82e-06	-0.790385	0.156301	3.78778	0.206291	0.0230586	0.0164494	0.0502316	0.0502316
sls	4.35e-07	3.9e-06	-0.562107	0.111248	9.72359	0.119925	9.72e-05	0.037031	0.0131755	0.037031
Cbp53E	4.39e-07	3.92e-06	-0.522169	0.103372	6.46715	0.103505	0.00195588	0.0301017	0.017862	0.0301017
CG2017	4.43e-07	3.96e-06	-0.348785	0.0690741	6.95862	0.0433478	0.00109892	0.0100883	0.0132148	0.0132148
CG14219	4.43e-07	3.96e-06	3.04911	0.60385	2.02928	3.53002	0.193212	0.900693	0.125919	0.900693
CG10960	4.54e-07	4.05e-06	0.432861	0.0858043	9.11681	0.0711799	0.000131469	0.0219557	0.0111341	0.0219557
Map205	4.62e-07	4.12e-06	0.532114	0.105552	9.02861	0.107607	0.000129637	0.0332939	0.0109432	0.0332939
Mid1	4.64e-07	4.13e-06	-0.542575	0.107637	5.30165	0.0906998	0.00428027	0.00717309	0.0304768	0.0304768
cas	4.67e-07	4.15e-06	-1.02755	0.203901	3.88642	0.40135	0.0249255	0.099801	0.0484124	0.099801
CG31661	4.77e-07	4.24e-06	1.47339	0.292603	6.39924	0.825554	0.00218659	0.254663	0.0186337	0.254663
CG13670	4.86e-07	4.32e-06	-1.39104	0.276445	2.33532	0.716324	0.124043	0.0834152	0.105223	0.105223
tst	4.92e-07	4.37e-06	0.305582	0.0607582	7.71403	0.028833	0.000473842	0.00322826	0.0106008	0.0106008
Mp20	4.95e-07	4.38e-06	-0.31972	0.0635835	8.38534	0.0389044	0.000228287	0.0119003	0.0102186	0.0119003
Tor	4.95e-07	4.38e-06	0.299924	0.0596456	7.97364	0.0310805	0.00031796	0.00688421	0.0103548	0.0103548
Ugt35E1	4.95e-07	4.38e-06	-1.53951	0.306168	2.29998	0.846869	0.17382	0.0467056	0.107397	0.107397
Cyp49a1	4.97e-07	4.4e-06	-0.612065	0.121742	4.98319	0.136057	0.0101722	0.0271036	0.0342915	0.0342915
CG34120	5.03e-07	4.45e-06	0.45977	0.0914954	7.22547	0.0804825	0.000825095	0.0242891	0.0119343	0.0242891
CapaR	5.04e-07	4.46e-06	-0.749493	0.149165	3.99872	0.194094	0.0202058	0.0247757	0.0465445	0.0465445
CG42394	5.09e-07	4.49e-06	-0.529864	0.105486	5.4803	0.105192	0.00501247	0.0264718	0.0283695	0.0283695
fra	5.13e-07	4.53e-06	0.400086	0.079678	7.1515	0.0609695	0.000912459	0.0181333	0.012242	0.0181333
CG11873	5.16e-07	4.55e-06	0.455421	0.0907189	8.52223	0.079011	0.000212896	0.0244768	0.0102834	0.0244768
Npc2g	5.18e-07	4.56e-06	0.982379	0.195708	6.29283	0.367659	0.00221952	0.112686	0.0198003	0.112686
mei-41	5.34e-07	4.7e-06	0.42211	0.0841929	7.22745	0.0679258	0.000657888	0.0206074	0.0119265	0.0206074
CG10352	5.36e-07	4.72e-06	0.868324	0.173222	4.05043	0.287467	0.0198522	0.0701656	0.0457461	0.0701656
CG43737	5.4e-07	4.75e-06	-0.543235	0.1084	5.30871	0.106494	0.00485868	0.0237537	0.0303927	0.0303927
stops	5.41e-07	4.75e-06	-0.523679	0.104505	5.50337	0.098358	0.00466251	0.0212593	0.0281013	0.0281013
CG10073	5.41e-07	4.75e-06	1.68632	0.336513	1.97974	1.07135	0.210028	0.115358	0.129696	0.129696
mus308	5.42e-07	4.75e-06	0.466189	0.093034	7.42205	0.0828779	0.000597625	0.0253684	0.011256	0.0253684
Nckx30C	5.43e-07	4.76e-06	-0.463294	0.0924623	6.23006	0.0818548	0.00121136	0.0244365	0.0204354	0.0244365
CG13618	5.44e-07	4.76e-06	-0.560982	0.111967	5.22553	0.100682	0.0062235	0.0101165	0.0313863	0.0313863
lncRNA:CR45180	5.5e-07	4.81e-06	-1.32878	0.265325	2.62179	0.673538	0.103794	0.107398	0.0894348	0.107398
pirk	5.73e-07	5.01e-06	0.847421	0.169479	4.8606	0.274187	0.0101454	0.076024	0.0357355	0.076024
PlexB	5.73e-07	5.01e-06	0.54925	0.109851	8.22794	0.115186	0.000275568	0.0359259	0.0102086	0.0359259
CG1371	5.82e-07	5.08e-06	0.364297	0.0729013	8.56759	0.0506887	0.000182982	0.0157608	0.0103151	0.0157608
AdipoR	5.83e-07	5.08e-06	0.386725	0.0773962	8.57621	0.057125	0.000190755	0.0177798	0.0103216	0.0177798
CG11658	5.83e-07	5.08e-06	-0.482855	0.0966327	6.11078	0.089053	0.00164792	0.0263657	0.0215704	0.0263657
CG13786	5.85e-07	5.09e-06	1.10765	0.221698	3.63575	0.468652	0.0324152	0.115035	0.0534364	0.115035
mlt	5.86e-07	5.1e-06	-0.29574	0.059198	8.37699	0.0298782	0.000296918	0.00633049	0.0102163	0.0102163
CG7646	5.91e-07	5.14e-06	-0.490723	0.0982588	5.83962	0.0791452	0.00462332	0.0101938	0.024341	0.024341
Rbfox1	5.94e-07	5.16e-06	-0.439215	0.0879608	8.09336	0.073713	0.000299855	0.0229115	0.0102629	0.0229115
Cyp305a1	6.03e-07	5.24e-06	0.841506	0.168633	5.94457	0.270683	0.00284382	0.0824675	0.0232373	0.0824675
CG42705	6.05e-07	5.25e-06	-0.781193	0.156563	7.29611	0.233286	0.00121511	0.0723208	0.0116687	0.0723208
stl	6.09e-07	5.28e-06	0.770868	0.154537	6.1799	0.227197	0.00223109	0.069414	0.0209084	0.069414
CG2926	6.15e-07	5.33e-06	0.368749	0.0739491	9.16863	0.0519983	0.000124276	0.0162811	0.0112578	0.0162811
CG15253	6.16e-07	5.34e-06	-1.64498	0.329915	2.64685	1.03483	0.154366	0.172165	0.0881973	0.172165
Dlg5	6.44e-07	5.57e-06	0.571854	0.114886	8.37428	0.125183	0.000257422	0.0393392	0.0102156	0.0393392
Mlc2	6.44e-07	5.57e-06	-0.334777	0.0672579	9.79492	0.0428176	5.98e-05	0.0134169	0.0135111	0.0135111
Qsox2	6.54e-07	5.65e-06	-0.672515	0.135189	4.39647	0.137643	0.0137149	0.00200975	0.0411131	0.0411131
CG12483	6.57e-07	5.68e-06	-0.802114	0.161276	3.73581	0.239532	0.0267623	0.0437069	0.0512678	0.0512678
Drsl2	6.7e-07	5.78e-06	1.81555	0.365314	1.49039	1.26294	0.198444	0.201918	0.174706	0.201918
CG1648	6.84e-07	5.9e-06	-0.788715	0.158832	7.92608	0.238459	0.00040674	0.0752763	0.0103913	0.0752763
lva	6.9e-07	5.95e-06	0.298281	0.0600878	8.89527	0.0285148	0.000132285	0.00454253	0.0106993	0.0106993
hbs	7e-07	6.02e-06	-0.793135	0.159861	3.73772	0.237977	0.0254377	0.0476181	0.0512287	0.0512287
CG34025	7.05e-07	6.06e-06	-1.83474	0.369903	2.14893	1.29125	0.209857	0.200628	0.117307	0.200628
enok	7.1e-07	6.1e-06	0.508863	0.102622	8.12808	0.0993424	0.000330004	0.0312641	0.0102429	0.0312641
Abd-B	7.12e-07	6.11e-06	-0.604773	0.121976	4.80621	0.137384	0.00827043	0.0331271	0.0363642	0.0363642
futsch	7.13e-07	6.12e-06	-0.363516	0.0733228	6.78644	0.0507017	0.0010438	0.0150849	0.0145127	0.0150849
CG45263	7.15e-07	6.13e-06	-0.543648	0.109666	5.2732	0.097971	0.00526382	0.0138383	0.0308162	0.0308162
CG8177	7.25e-07	6.22e-06	0.295723	0.0596887	8.77337	0.0310547	0.000166433	0.00775813	0.0105218	0.0105218
Hlc	7.27e-07	6.22e-06	-0.295884	0.0597256	8.78025	0.0262546	0.000170746	0.00244505	0.0105307	0.0105307
beta4GalNAcTA	7.28e-07	6.23e-06	0.318406	0.0642752	7.27498	0.0296575	0.000648463	0.00156019	0.0117454	0.0117454
Vm26Ab	7.33e-07	6.27e-06	0.965525	0.19496	10.6497	0.357909	2.85e-05	0.114	0.0197017	0.114
LpR2	7.5e-07	6.41e-06	0.30524	0.0616912	9.17971	0.0329273	0.000132097	0.00813658	0.0112853	0.0112853
Adgf-D	7.57e-07	6.46e-06	0.897473	0.18145	5.5418	0.309464	0.00462868	0.0941441	0.027657	0.0941441
CG34445	7.69e-07	6.56e-06	-0.681818	0.137936	4.28811	0.175954	0.0146191	0.039467	0.0424597	0.0424597
CG12608	7.69e-07	6.56e-06	-0.30019	0.0607306	7.70331	0.0330669	0.000448968	0.00889041	0.0106157	0.0106157
rno	7.77e-07	6.62e-06	0.640446	0.129616	8.4512	0.157684	0.000226092	0.0501747	0.0102437	0.0501747
Or45a	7.79e-07	6.63e-06	-2.07704	0.420402	1.81618	1.65859	0.178025	0.352189	0.143112	0.352189
beat-VII	7.8e-07	6.64e-06	-0.538597	0.109023	5.31156	0.0922324	0.0052996	0.00912994	0.0303587	0.0303587
CG17036	7.84e-07	6.65e-06	0.519324	0.105139	5.45793	0.098208	0.00453204	0.0225875	0.0286306	0.0286306
CG15254	7.83e-07	6.65e-06	-1.43486	0.290489	4.50331	0.791635	0.0185493	0.234603	0.0398429	0.234603
bap	7.84e-07	6.65e-06	-1.13067	0.228909	3.29205	0.491563	0.0457662	0.111431	0.0627992	0.111431
gpp	7.97e-07	6.76e-06	0.393147	0.0796461	9.08774	0.0594544	0.000115703	0.0189148	0.0110685	0.0189148
ppk	7.98e-07	6.76e-06	-1.02966	0.208605	2.98519	0.318676	0.0571003	-0.02462	0.0734481	0.0734481
knrl	8.02e-07	6.79e-06	-0.606009	0.1228	4.75027	0.134115	0.0082336	0.0291186	0.0370059	0.0370059
CG17646	8.21e-07	6.95e-06	0.537934	0.109107	7.17691	0.111386	0.000881001	0.0348321	0.0121327	0.0348321
mspo	8.27e-07	6.99e-06	-0.563014	0.114227	5.10713	0.107214	0.00633639	0.016503	0.0328069	0.0328069
BBS9	8.49e-07	7.17e-06	-0.960203	0.195013	3.2569	0.344757	0.0501855	0.0524505	0.0639042	0.0639042
CG2680	8.49e-07	7.17e-06	-0.643022	0.130599	6.39173	0.159283	0.00175227	0.0494158	0.0187184	0.0494158
His1:CG33810	8.52e-07	7.18e-06	-0.570303	0.115843	5.83369	0.125302	0.00241078	0.0378483	0.0244045	0.0378483
His1:CG33819	8.52e-07	7.18e-06	-0.570303	0.115843	5.83369	0.125302	0.00241078	0.0378483	0.0244045	0.0378483
ap	8.59e-07	7.24e-06	0.570006	0.115822	5.08559	0.11944	0.0071789	0.0267327	0.0330655	0.0330655
CG6362	8.61e-07	7.25e-06	-0.913554	0.185642	3.3674	0.299928	0.0428665	0.0366808	0.0605221	0.0605221
Ns2	8.65e-07	7.28e-06	-0.329229	0.0669143	8.21182	0.0417729	0.000280084	0.0131525	0.0102119	0.0131525
CAH8	9.04e-07	7.6e-06	-1.06919	0.217697	3.16059	0.441024	0.0597961	0.0823799	0.0670783	0.0823799
CG7203	9.13e-07	7.67e-06	0.471291	0.0959941	7.12262	0.0857084	0.000781992	0.0268626	0.0123709	0.0268626
Nep1	9.18e-07	7.7e-06	-0.456884	0.0930792	6.07127	0.0805584	0.00243225	0.023559	0.0219572	0.023559
Eph	9.29e-07	7.8e-06	0.289344	0.0589769	8.34069	0.0316847	0.000226461	0.00951068	0.0102084	0.0102084
CG3224	9.42e-07	7.9e-06	-0.484731	0.0988571	7.71867	0.0907341	0.000490767	0.0288274	0.0105946	0.0288274
Pgant9	9.53e-07	7.98e-06	0.54227	0.110642	7.99447	0.113584	0.000619652	0.0361056	0.0103388	0.0361056
psh	9.62e-07	8.06e-06	0.54778	0.111811	5.15918	0.111115	0.00532311	0.0268845	0.0321821	0.0321821
Scgdelta	9.7e-07	8.12e-06	-1.08951	0.222461	5.96278	0.458706	0.00490984	0.143557	0.0230498	0.143557
CRAT	9.81e-07	8.2e-06	0.315609	0.0644712	7.26789	0.0310261	0.000697896	0.00354805	0.0117717	0.0117717
MED26	9.83e-07	8.21e-06	0.352474	0.0720053	8.9475	0.0480232	0.000130079	0.0154242	0.0107885	0.0154242
stumps	9.91e-07	8.27e-06	-0.50718	0.103645	5.52346	0.0968879	0.0043585	0.0250486	0.0278686	0.0278686
Cad87A	9.92e-07	8.28e-06	0.484595	0.099035	8.12448	0.090794	0.00036261	0.0290612	0.0102448	0.0290612
Pkc53E	1e-06	8.37e-06	-0.446985	0.0913939	6.06626	0.0772702	0.00216281	0.0228957	0.0220067	0.0228957
ena	1.01e-06	8.38e-06	0.343814	0.0703032	7.87339	0.0457182	0.000342128	0.0144855	0.0104333	0.0144855
CG32726	1.02e-06	8.52e-06	-0.917534	0.187745	3.80399	0.325733	0.0315946	0.0741503	0.0499198	0.0741503
CG1640	1.03e-06	8.53e-06	0.298444	0.061074	9.08986	0.0290649	0.000116868	0.00513391	0.0110732	0.0110732
Sec71	1.04e-06	8.61e-06	0.546372	0.111852	7.64814	0.115536	0.000551557	0.0369813	0.010702	0.0369813
Smyd4-2	1.05e-06	8.7e-06	-0.740319	0.15163	3.94231	0.195435	0.0215167	0.0290406	0.0474583	0.0474583
babos	1.06e-06	8.81e-06	0.457393	0.0937294	7.43312	0.0810164	0.000591277	0.0257643	0.0112232	0.0257643
CG9297	1.07e-06	8.87e-06	-0.468014	0.0959347	9.25333	0.0848377	0.00010005	0.0275104	0.0114787	0.0275104
Vha68-1	1.08e-06	8.94e-06	-0.391143	0.0802072	6.92082	0.0592704	0.000945279	0.0183543	0.0134574	0.0183543
oys	1.09e-06	9.05e-06	0.294326	0.0603853	8.96027	0.0312816	0.000127574	0.00829386	0.0108116	0.0108116
CG6688	1.11e-06	9.17e-06	-0.85277	0.17506	3.48975	0.273193	0.0348598	0.047488	0.0570782	0.0570782
hpRNA:CR46342	1.11e-06	9.2e-06	0.295462	0.0606615	7.7192	0.0317817	0.000445594	0.00832488	0.0105939	0.0105939
Pxn	1.13e-06	9.33e-06	-0.58621	0.120431	7.20841	0.133276	0.0008435	0.0426672	0.0120025	0.0426672
smal	1.13e-06	9.36e-06	-0.565098	0.116109	5.0509	0.113239	0.00696246	0.0217996	0.0334815	0.0334815
oc	1.14e-06	9.41e-06	-0.648904	0.133364	4.42569	0.136583	0.0125968	0.011321	0.040761	0.040761
CG10096	1.15e-06	9.49e-06	-0.379072	0.0779381	6.66477	0.0489518	0.00253768	0.00820062	0.0156854	0.0156854
CG14820	1.15e-06	9.49e-06	-2.81952	0.579687	2.92038	3.08457	0.0927811	0.915329	0.0760087	0.915329
lncRNA:CR44289	1.16e-06	9.51e-06	0.596127	0.122579	5.0267	0.137898	0.00667018	0.038407	0.0337714	0.038407
faf	1.17e-06	9.6e-06	0.467084	0.0960818	9.35116	0.0846776	8.26e-05	0.0276126	0.0117639	0.0276126
CPT2	1.18e-06	9.73e-06	0.296731	0.0610755	7.66084	0.029463	0.000510121	0.00548441	0.0106805	0.0106805
CG42780	1.19e-06	9.79e-06	-0.619265	0.127497	5.58474	0.148921	0.00346432	0.0453025	0.0271644	0.0453025
Got1	1.21e-06	9.95e-06	0.291999	0.0601609	8.91366	0.0252065	0.000128166	0.00201987	0.0107298	0.0107298
CG3191	1.22e-06	9.97e-06	-0.54575	0.112454	5.16543	0.0939627	0.00583086	0.00817519	0.0321071	0.0321071
CG9253	1.22e-06	1e-05	-0.289144	0.0595887	8.74624	0.0265543	0.000164446	0.00396401	0.010488	0.010488
repo	1.23e-06	1.01e-05	-0.607021	0.125153	4.6935	0.138581	0.00933562	0.0325616	0.0376544	0.0376544
Duox	1.24e-06	1.02e-05	0.405151	0.0835643	8.6357	0.0638119	0.000184136	0.0207648	0.0103714	0.0207648
svr	1.25e-06	1.02e-05	0.385046	0.0794269	8.88128	0.05764	0.000186722	0.0187392	0.0106768	0.0187392
Ca-alpha1D	1.26e-06	1.03e-05	-0.375886	0.0775609	6.81071	0.0549402	0.00114169	0.0169054	0.0143015	0.0169054
Traf-like	1.26e-06	1.03e-05	-1.04446	0.215527	4.57159	0.424203	0.0203887	0.118967	0.0390506	0.118967
Hel89B	1.27e-06	1.04e-05	0.287426	0.0593328	8.08499	0.0312339	0.000292784	0.00928038	0.0102684	0.0102684
Rme-8	1.29e-06	1.05e-05	0.372863	0.0770168	8.63112	0.0540935	0.000164071	0.0176307	0.0103673	0.0176307
Nep2	1.29e-06	1.05e-05	0.645856	0.133413	7.72645	0.162306	0.000512922	0.0528845	0.0105844	0.0528845
Muc12Ea	1.3e-06	1.06e-05	1.0526	0.217472	8.89533	0.431154	0.000162957	0.141719	0.0106994	0.141719
HisCl1	1.3e-06	1.06e-05	-0.842188	0.174022	3.46995	0.229206	0.0332353	0.00610708	0.0576152	0.0576152
dpr13	1.31e-06	1.06e-05	-0.675832	0.139666	4.19065	0.151313	0.0147778	0.0146416	0.0437417	0.0437417
Acsl	1.31e-06	1.06e-05	0.430377	0.0889491	9.16586	0.0720938	0.000106488	0.0236293	0.0112509	0.0236293
grk	1.31e-06	1.06e-05	-0.320467	0.0662377	7.11957	0.0311526	0.000777506	0.00268074	0.0123848	0.0123848
CG32409	1.32e-06	1.07e-05	-0.363084	0.0750745	8.11343	0.051325	0.000289693	0.0166188	0.0102508	0.0166188
Gdh	1.33e-06	1.08e-05	0.311994	0.0645201	9.54245	0.0275136	6.75e-05	0.000995422	0.012421	0.012421
frac	1.33e-06	1.08e-05	-0.724838	0.149922	5.78687	0.204588	0.00359614	0.0638334	0.0249096	0.0638334
CG2918	1.36e-06	1.1e-05	0.304865	0.0631115	9.29248	0.0362109	8.54e-05	0.0118638	0.0115888	0.0118638
DppIII	1.38e-06	1.11e-05	0.304426	0.063047	9.37557	0.0293793	8.45e-05	0.00443014	0.0118403	0.0118403
CG31998	1.38e-06	1.12e-05	0.738408	0.152956	8.49019	0.21251	0.000215396	0.0699713	0.010264	0.0699713
CG10910	1.38e-06	1.12e-05	1.36446	0.28264	6.18838	0.725619	0.00236013	0.237296	0.0208285	0.237296
CG43326	1.39e-06	1.12e-05	-0.802521	0.166269	4.40891	0.251044	0.0379313	0.0450044	0.0409627	0.0450044
Usp32	1.39e-06	1.13e-05	0.510241	0.105731	8.03477	0.101492	0.000340432	0.0331966	0.0103066	0.0331966
snz	1.4e-06	1.13e-05	0.327041	0.0677777	8.01023	0.0416984	0.000325437	0.013456	0.0103264	0.013456
CG11345	1.4e-06	1.13e-05	-1.7381	0.360213	1.90194	1.07946	0.253367	0.0277393	0.135892	0.135892
Sec31	1.41e-06	1.14e-05	0.284882	0.059063	8.47023	0.028265	0.000212192	0.00653206	0.0102531	0.0102531
tey	1.42e-06	1.14e-05	-0.692189	0.143523	4.05313	0.164651	0.0160909	0.0212875	0.0457054	0.0457054
CG34305	1.42e-06	1.15e-05	-0.966879	0.200526	3.07572	0.317881	0.0505709	0.0186419	0.0700617	0.0700617
CG34401	1.43e-06	1.15e-05	0.658242	0.136525	8.56574	0.169001	0.000218838	0.055698	0.0103137	0.055698
eater	1.43e-06	1.15e-05	1.00966	0.209423	3.88698	0.397632	0.0257108	0.105863	0.0484027	0.105863
CG13784	1.44e-06	1.15e-05	0.489797	0.101621	8.29203	0.0935918	0.000538212	0.0304424	0.0102037	0.0304424
Tango1	1.44e-06	1.16e-05	0.286808	0.0595124	8.72753	0.0318914	0.000159266	0.0102437	0.0104659	0.0104659
ctrip	1.46e-06	1.17e-05	0.562331	0.116748	9.77264	0.123413	5.8e-05	0.040832	0.0134038	0.040832
NAT1	1.47e-06	1.18e-05	0.367229	0.0762627	10.4005	0.047159	3.18e-05	0.0113859	0.0174161	0.0174161
ERp60	1.48e-06	1.18e-05	0.33893	0.0704007	9.99283	0.0448463	4.57e-05	0.0148231	0.014567	0.0148231
cana	1.48e-06	1.19e-05	0.392696	0.0815856	8.88802	0.0602105	0.000147107	0.0198215	0.0106876	0.0198215
CG13148	1.49e-06	1.19e-05	-0.685162	0.142365	4.27768	0.170184	0.0182106	0.0281578	0.0425932	0.0425932
Drgx	1.49e-06	1.19e-05	-0.719517	0.149518	3.95308	0.187909	0.0197871	0.0316012	0.0472801	0.0472801
dbe	1.51e-06	1.2e-05	-0.308158	0.0640635	7.51096	0.0370916	0.000557162	0.0117552	0.0110063	0.0117552
htl	1.52e-06	1.21e-05	-0.567501	0.118014	5.73919	0.125818	0.00299186	0.0387901	0.025431	0.0387901
gammaTub23C	1.54e-06	1.23e-05	-0.314491	0.0654347	7.21021	0.0377324	0.000849855	0.0109844	0.0119952	0.0119952
MsR2	1.54e-06	1.23e-05	-0.681069	0.14173	4.26298	0.16617	0.0174796	0.0261505	0.0427828	0.0427828
CG7988	1.55e-06	1.23e-05	-0.523038	0.10885	5.57065	0.106923	0.00381649	0.0317284	0.0273256	0.0317284
lncRNA:CR45184	1.56e-06	1.24e-05	-0.60015	0.124943	8.6447	0.140806	0.00113174	0.0457008	0.0103796	0.0457008
CG31446	1.57e-06	1.25e-05	-1.14784	0.23905	4.53545	0.515177	0.0130879	0.158347	0.0394686	0.158347
Sema5c	1.59e-06	1.26e-05	0.430068	0.0896037	6.4728	0.0723401	0.0017238	0.0223627	0.0177977	0.0223627
CG15547	1.6e-06	1.27e-05	-0.605734	0.12624	4.78514	0.14353	0.00920436	0.0386049	0.0366063	0.0386049
arr	1.64e-06	1.3e-05	0.359784	0.0750668	6.74699	0.0506713	0.00112424	0.0157809	0.0148731	0.0157809
CARPA	1.65e-06	1.31e-05	-0.764703	0.159582	3.60752	0.220752	0.0223053	0.0450909	0.0540939	0.0540939
asRNA:CR44106	1.65e-06	1.31e-05	-0.977849	0.204061	4.22752	0.374345	0.0207401	0.104183	0.0432474	0.104183
CG14400	1.67e-06	1.32e-05	1.13461	0.236888	4.54488	0.504136	0.0143105	0.154038	0.0393592	0.154038
CG13160	1.68e-06	1.33e-05	-1.30396	0.272321	2.96081	0.665975	0.0690646	0.153411	0.0743975	0.153411
ZAP3	1.72e-06	1.36e-05	0.282351	0.0590174	8.20832	0.0251838	0.000236413	0.00354922	0.0102127	0.0102127
CG31928	1.72e-06	1.36e-05	1.53236	0.32029	7.35857	0.920177	0.000819277	0.306938	0.0114549	0.306938
lncRNA:CR43301	1.72e-06	1.36e-05	-0.613544	0.128269	4.55183	0.113783	0.0100803	0.0021497	0.0392788	0.0392788
CG8765	1.75e-06	1.38e-05	0.349115	0.0730295	7.73078	0.0477858	0.00045193	0.015548	0.0105788	0.015548
Spn42Dd	1.76e-06	1.39e-05	0.558917	0.116942	5.00699	0.12096	0.00701923	0.0323202	0.0340072	0.0340072
inaD	1.76e-06	1.39e-05	-0.523637	0.109569	6.83481	0.107523	0.0010773	0.0349389	0.0141004	0.0349389
Had2	1.8e-06	1.42e-05	0.766674	0.160581	4.7262	0.230632	0.0100656	0.0672927	0.0372811	0.0672927
Crtc	1.81e-06	1.42e-05	0.282139	0.0591014	8.24383	0.0295668	0.000272719	0.00837002	0.0102062	0.0102062
Cyp316a1	1.82e-06	1.43e-05	1.9153	0.401362	1.05678	1.27317	0.254234	0.0457414	0.229041	0.229041
jvl	1.83e-06	1.44e-05	0.525594	0.11016	8.41683	0.108437	0.000276923	0.0361288	0.0102292	0.0361288
eRF3	1.85e-06	1.45e-05	0.311369	0.0652853	9.61552	0.0336259	7.74e-05	0.00782586	0.0127091	0.0127091
bel	1.87e-06	1.46e-05	0.471578	0.0989188	9.75117	0.0873368	5.65e-05	0.0292983	0.0133026	0.0292983
Hip1	1.87e-06	1.46e-05	0.368753	0.077349	7.6507	0.053402	0.000481269	0.0174673	0.0106976	0.0174673
Rbp	1.88e-06	1.47e-05	-0.46739	0.0980628	5.69134	0.0728089	0.00288787	0.0116658	0.0259611	0.0259611
CG34396	1.88e-06	1.47e-05	-0.518962	0.108887	5.36986	0.100184	0.0059027	0.0235038	0.0296667	0.0296667
CG42284	1.9e-06	1.49e-05	-0.888018	0.186425	4.09836	0.30985	0.0373103	0.0669521	0.0450364	0.0669521
CG9150	1.95e-06	1.53e-05	-0.798092	0.167717	3.57151	0.211512	0.0294231	0.0121542	0.0549638	0.0549638
spas	1.96e-06	1.53e-05	0.425054	0.089347	8.21833	0.0710454	0.0002383	0.0237104	0.0102105	0.0237104
spo	1.98e-06	1.55e-05	0.950702	0.19993	5.20061	0.355515	0.00785568	0.11206	0.031685	0.11206
CG3788	1.99e-06	1.56e-05	-0.348174	0.0732365	6.7492	0.0432218	0.00123836	0.00993799	0.0148524	0.0148524
CG33298	2e-06	1.56e-05	0.517422	0.108851	8.34473	0.10533	0.000252939	0.0352929	0.0102091	0.0352929
CG42806	2.02e-06	1.57e-05	-0.370822	0.0780367	6.86026	0.0541108	0.00106833	0.0172009	0.0138977	0.0172009
stet	2.03e-06	1.58e-05	0.281864	0.0593313	8.16564	0.0306678	0.000334567	0.0095658	0.010226	0.010226
CG15019	2.03e-06	1.58e-05	-0.416526	0.0876848	7.90272	0.0682855	0.000432862	0.022633	0.0104096	0.022633
lncRNA:CR44898	2.04e-06	1.58e-05	-1.25494	0.26421	3.75205	0.539967	0.158482	-0.0369811	0.0509378	0.0509378
CG14274	2.06e-06	1.6e-05	-0.648988	0.13669	4.28272	0.139049	0.0135241	0.0130737	0.0425286	0.0425286
CG1463	2.08e-06	1.62e-05	-0.316609	0.0667228	7.09368	0.0279501	0.000850482	-0.000177635	0.0125053	0.0125053
del	2.1e-06	1.63e-05	0.298407	0.0629051	8.87671	0.0350775	0.000150703	0.0117205	0.0106695	0.0117205
east	2.11e-06	1.64e-05	0.509277	0.107386	9.03002	0.102186	0.000103376	0.034492	0.010946	0.034492
CG12071	2.12e-06	1.64e-05	-0.577784	0.121842	4.76147	0.109279	0.00765864	0.0123983	0.0368777	0.0368777
lncRNA:CR43196	2.14e-06	1.66e-05	-0.579408	0.122235	5.52088	0.132308	0.00412429	0.0406998	0.0278985	0.0406998
Wnt5	2.15e-06	1.66e-05	0.343295	0.0724365	6.90561	0.0464514	0.000979532	0.0147616	0.0135622	0.0147616
CG14042	2.15e-06	1.67e-05	-0.760456	0.160485	4.71133	0.197607	0.0398153	0.0040642	0.0374508	0.0374508
CG30047	2.17e-06	1.68e-05	-1.31038	0.276638	4.34756	0.67701	0.017951	0.211634	0.0417121	0.211634
CG42327	2.2e-06	1.7e-05	0.422876	0.0893218	7.8145	0.0705293	0.000412668	0.0235225	0.0104859	0.0235225
ine	2.21e-06	1.71e-05	-0.427889	0.0904076	6.84916	0.0722249	0.00162192	0.0228987	0.0139848	0.0228987
Scgalpha	2.23e-06	1.72e-05	-0.597485	0.126273	4.68578	0.114189	0.0100919	0.00841949	0.0377426	0.0377426
Ptth	2.24e-06	1.73e-05	-0.960553	0.203068	3.15044	0.311934	0.0562843	0.0100448	0.0674259	0.0674259
pre-lola-G	2.25e-06	1.73e-05	-1.12278	0.237381	7.42784	0.49749	0.0240989	0.14495	0.0112388	0.14495
CG14834	2.27e-06	1.75e-05	0.648274	0.137122	8.84348	0.165895	0.000144175	0.0562629	0.0106187	0.0562629
CG13931	2.28e-06	1.75e-05	-1.33253	0.281894	2.65084	0.540119	0.15039	-0.0889508	0.0880023	0.0880023
mab-21	2.28e-06	1.75e-05	-0.635642	0.134469	4.37441	0.123505	0.0128641	0.00177875	0.0413817	0.0413817
CG7084	2.28e-06	1.75e-05	-0.602854	0.127537	7.68484	0.143479	0.00061302	0.0481844	0.0106426	0.0481844
elB	2.29e-06	1.76e-05	-0.453194	0.0958853	5.84913	0.079106	0.00334249	0.0220585	0.0242395	0.0242395
nord	2.32e-06	1.78e-05	-0.526276	0.111412	5.21839	0.108902	0.00576606	0.0309365	0.0314719	0.0314719
Pebp1	2.32e-06	1.78e-05	1.60892	0.340606	7.5222	1.02239	0.000791146	0.347245	0.0109769	0.347245
Tep4	2.32e-06	1.78e-05	0.444589	0.094126	7.73942	0.07807	0.000446659	0.0261325	0.0105679	0.0261325
Piezo	2.35e-06	1.8e-05	0.406395	0.0860948	7.00685	0.0652582	0.000963193	0.0212738	0.0129422	0.0212738
ovo	2.38e-06	1.82e-05	0.300234	0.0636359	9.44784	0.0308791	6.95e-05	0.00685524	0.012079	0.012079
Dl	2.39e-06	1.83e-05	0.278865	0.0591116	8.18696	0.0243996	0.000263917	0.00324591	0.0102186	0.0102186
CG33129	2.39e-06	1.83e-05	0.3011	0.063829	9.46454	0.030225	8.55e-05	0.00596359	0.0121369	0.0121369
Efa6	2.4e-06	1.84e-05	0.42366	0.0898335	8.28154	0.0709605	0.000282145	0.023928	0.0102037	0.023928
Ppa	2.49e-06	1.9e-05	-0.525106	0.11151	5.72356	0.109113	0.00316152	0.0341418	0.0256034	0.0341418
Gs2	2.49e-06	1.9e-05	0.432513	0.0918478	8.83388	0.0740258	0.000154905	0.0251532	0.0106046	0.0251532
Liprin-alpha	2.52e-06	1.92e-05	0.425314	0.0903655	8.09453	0.0716048	0.000329421	0.0241684	0.0102621	0.0241684
pod1	2.54e-06	1.93e-05	0.345593	0.0734487	8.48987	0.047286	0.000182086	0.0160021	0.0102638	0.0160021
Zasp52	2.56e-06	1.95e-05	-0.378267	0.0804244	9.08579	0.0566637	0.000231269	0.019173	0.0110642	0.019173
Drat	2.57e-06	1.95e-05	-0.683327	0.145303	7.92398	0.184927	0.000410123	0.0629285	0.0103929	0.0629285
CG33098	2.59e-06	1.97e-05	-0.645819	0.137377	4.29831	0.164198	0.0142877	0.041205	0.0423297	0.0423297
CG32568	2.59e-06	1.97e-05	-1.29076	0.274572	2.52962	0.627245	0.131992	0.0581553	0.0941767	0.0941767
Hr4	2.6e-06	1.98e-05	0.815339	0.173481	6.16722	0.263382	0.0023143	0.0879725	0.0210285	0.0879725
CG9628	2.61e-06	1.98e-05	-0.33594	0.0714815	6.82043	0.0420456	0.00110949	0.011284	0.0142193	0.0142193
CG30122	2.62e-06	1.99e-05	0.286825	0.061044	9.08897	0.0319803	0.000107875	0.01039	0.0110712	0.0110712
numb	2.62e-06	1.99e-05	0.278054	0.0591811	8.3352	0.0273745	0.00029972	0.00661804	0.0102075	0.0102075
mus205	2.63e-06	1.99e-05	0.383892	0.0817163	7.40132	0.0584042	0.000610494	0.0194222	0.011319	0.0194222
Pgi	2.64e-06	2e-05	0.308845	0.0657527	9.66256	0.0287525	6.42e-05	0.00294804	0.0129061	0.0129061
GCS2beta	2.64e-06	2e-05	0.356705	0.0759488	8.55929	0.0504329	0.000186615	0.017118	0.0103089	0.017118
beat-Vb	2.66e-06	2.01e-05	-0.791445	0.168554	3.5428	0.199772	0.0295475	0.00228676	0.055684	0.055684
CG5687	2.66e-06	2.01e-05	-0.337855	0.0719557	6.81454	0.0393944	0.00126388	0.00782611	0.014269	0.014269
JIL-1	2.68e-06	2.03e-05	0.277724	0.0591701	8.54048	0.023111	0.00020774	0.00207522	0.0102956	0.0102956
CG6115	2.69e-06	2.03e-05	-0.449865	0.0958522	7.84622	0.0802513	0.000406502	0.0271564	0.0104566	0.0271564
Vm34Ca	2.7e-06	2.03e-05	0.846691	0.180432	11.2025	0.284302	1.5e-05	0.0976521	0.0267544	0.0976521
CG18417	2.7e-06	2.04e-05	-1.96899	0.419629	3.55461	1.53759	0.0570784	0.471186	0.0553849	0.471186
Dhc64C	2.71e-06	2.04e-05	0.617916	0.131714	8.98743	0.151447	0.000158507	0.0518875	0.0108622	0.0518875
CG13255	2.74e-06	2.07e-05	-0.583949	0.124534	5.68229	0.135296	0.00696304	0.0395634	0.0260621	0.0395634
Srr	2.78e-06	2.09e-05	1.39347	0.297341	5.25878	0.77069	0.00833288	0.256902	0.0309885	0.256902
CG6712	2.79e-06	2.1e-05	-0.30687	0.0654904	7.79416	0.0373797	0.000463478	0.0124035	0.0105062	0.0124035
Mfe2	2.81e-06	2.11e-05	0.397611	0.0848839	7.51709	0.0627675	0.00059842	0.0210174	0.0109902	0.0210174
CG30196	2.81e-06	2.11e-05	-0.913855	0.195094	3.21628	0.269812	0.0489683	-0.00271458	0.0652164	0.0652164
CG4984	2.81e-06	2.11e-05	-0.411151	0.0877791	6.20888	0.0632238	0.00247895	0.0163536	0.0206366	0.0206366
D	2.86e-06	2.14e-05	-1.06391	0.227299	4.63777	0.449603	0.0141309	0.140864	0.038291	0.140864
CG8060	2.87e-06	2.15e-05	0.292168	0.0624274	7.46228	0.0250107	0.000552473	0.00135071	0.0111391	0.0111391
CG14692	2.87e-06	2.15e-05	-0.667218	0.142561	4.2163	0.155026	0.0175741	0.0194009	0.0433965	0.0433965
Epac	2.87e-06	2.15e-05	0.467676	0.09994	6.46697	0.0868912	0.00138401	0.02858	0.017864	0.02858
nAChRalpha2	2.89e-06	2.16e-05	-0.644523	0.137761	4.28635	0.161653	0.014452	0.0387435	0.0424821	0.0424821
HDAC11	2.91e-06	2.17e-05	-0.540858	0.115639	5.05417	0.0934724	0.00667492	0.00838666	0.0334423	0.0334423
Tsp42Eg	2.91e-06	2.17e-05	-0.557075	0.119104	6.49065	0.123325	0.00163116	0.0409263	0.0175944	0.0409263
CG31510	2.91e-06	2.17e-05	0.329643	0.0704844	7.37801	0.043185	0.000675296	0.0142288	0.0113921	0.0142288
GstD3	2.92e-06	2.17e-05	0.315239	0.0674067	7.04376	0.0388439	0.000880875	0.0120347	0.0127501	0.0127501
CG31051	2.93e-06	2.18e-05	-0.872198	0.186543	3.29935	0.284441	0.0418224	0.0428438	0.062573	0.062573
CG12398	2.94e-06	2.19e-05	1.18394	0.253253	6.60115	0.557207	0.00184056	0.19057	0.0163603	0.19057
CG16868	2.95e-06	2.2e-05	0.375932	0.0804292	8.04885	0.0561854	0.000306273	0.0191003	0.010295	0.0191003
CG14367	2.96e-06	2.2e-05	-0.661592	0.141555	4.28509	0.140053	0.0176155	0.00513097	0.0424982	0.0424982
Pask	2.98e-06	2.22e-05	-0.662237	0.141743	4.1981	0.132645	0.0166323	-0.00229064	0.0436408	0.0436408
roq	2.99e-06	2.22e-05	0.542147	0.11606	8.67199	0.116897	0.000216653	0.0401932	0.010406	0.0401932
Wnk	2.99e-06	2.22e-05	0.704393	0.15079	8.45517	0.197331	0.000243922	0.0679689	0.0102456	0.0679689
CrebA	3.05e-06	2.27e-05	0.479941	0.102835	6.9443	0.0916615	0.000901077	0.0308237	0.0133036	0.0308237
Rrp4	3.06e-06	2.27e-05	-0.318577	0.0682656	8.00563	0.040389	0.000361619	0.013619	0.01033	0.013619
CG46309	3.07e-06	2.27e-05	-0.696313	0.149224	5.61305	0.192963	0.0367436	0.0300599	0.0268419	0.0300599
PIG-A	3.07e-06	2.28e-05	0.316908	0.0679211	7.01863	0.0373177	0.000959991	0.00996031	0.0128798	0.0128798
CG15522	3.08e-06	2.28e-05	-0.765305	0.164039	3.66575	0.226632	0.0279653	0.0456222	0.0527606	0.0527606
Sap-r	3.08e-06	2.28e-05	0.407322	0.0873122	10.1537	0.0660398	4.38e-05	0.0228265	0.0155737	0.0228265
CG9691	3.1e-06	2.29e-05	0.491026	0.105282	7.08563	0.0959863	0.000882051	0.032371	0.0125437	0.032371
CG9422	3.14e-06	2.32e-05	-0.340302	0.0730076	7.63418	0.0461201	0.000797144	0.0151932	0.0107268	0.0151932
Dp1	3.15e-06	2.33e-05	0.473466	0.10159	9.78049	0.0892842	5.97e-05	0.0309018	0.0134413	0.0309018
Hsc70-5	3.18e-06	2.35e-05	0.295428	0.063413	9.41969	0.031307	7.99e-05	0.00817444	0.0119837	0.0119837
ppan	3.18e-06	2.35e-05	-0.279684	0.0600343	7.85907	0.0304234	0.000366888	0.00963179	0.0104455	0.0104455
CG7708	3.26e-06	2.4e-05	-0.525615	0.11295	5.11152	0.0874908	0.00551889	0.00783962	0.0327542	0.0327542
CG33096	3.28e-06	2.42e-05	0.31792	0.0683345	7.5586	0.0403007	0.000408477	0.0136003	0.0108854	0.0136003
up	3.29e-06	2.42e-05	-0.464571	0.099872	9.34459	0.0860647	9.01e-05	0.0298332	0.0117437	0.0298332
Cyp301a1	3.29e-06	2.42e-05	-0.771516	0.16586	3.66799	0.229514	0.0298173	0.0440766	0.0527111	0.0527111
Pcyt2	3.29e-06	2.42e-05	-0.503796	0.1083	5.33144	0.0802788	0.00506402	0.00709954	0.0301223	0.0301223
Men-b	3.31e-06	2.43e-05	0.295267	0.0634886	8.67245	0.0347702	0.000168894	0.0119235	0.0104064	0.0119235
CG3744	3.31e-06	2.43e-05	0.347521	0.0747225	8.56572	0.0481652	0.000218106	0.0165322	0.0103137	0.0165322
unc-13-4A	3.33e-06	2.44e-05	-0.591014	0.127122	4.58228	0.115621	0.00955229	0.0128418	0.0389275	0.0389275
GluClalpha	3.35e-06	2.46e-05	-0.420266	0.0904179	5.96601	0.0637437	0.00150965	0.0156215	0.0230166	0.0230166
Tektin-C	3.36e-06	2.46e-05	-0.427468	0.0919727	5.97023	0.071546	0.00240361	0.0214783	0.0229733	0.0229733
Vang	3.37e-06	2.47e-05	0.278742	0.0599882	7.88366	0.0268582	0.000370869	0.0058639	0.0104249	0.0104249
Ald1	3.39e-06	2.48e-05	0.390083	0.0839628	9.84125	0.0607261	5.63e-05	0.021093	0.0137413	0.021093
Calx	3.48e-06	2.54e-05	0.484084	0.104316	8.60825	0.0935882	0.00019962	0.0324462	0.0103475	0.0324462
CG15080	3.48e-06	2.55e-05	0.933775	0.201244	3.30561	0.348253	0.0488529	0.0726447	0.0623801	0.0726447
lncRNA:CR44816	3.5e-06	2.55e-05	-2.31208	0.498367	3.78535	2.13529	0.390428	0.354682	0.0502787	0.354682
Dll	3.51e-06	2.56e-05	-0.574333	0.123815	4.65856	0.110978	0.00793691	0.0151815	0.0380534	0.0380534
CG3961	3.52e-06	2.57e-05	0.45003	0.0970314	7.35627	0.0809123	0.000651424	0.0275939	0.0114624	0.0275939
Oda	3.53e-06	2.57e-05	-0.347267	0.0748827	10.3225	0.0394618	3.07e-05	0.00719901	0.0167915	0.0167915
boss	3.55e-06	2.59e-05	-0.449325	0.0969227	5.81539	0.0806817	0.00282086	0.0253612	0.0246011	0.0253612
CG14321	3.56e-06	2.59e-05	-1.03895	0.224129	2.85667	0.382972	0.0720583	0.0253862	0.0786425	0.0786425
Sec16	3.59e-06	2.61e-05	0.670192	0.144626	8.95636	0.179543	0.000159231	0.0625907	0.0108045	0.0625907
Dh44-R1	3.66e-06	2.66e-05	-0.899445	0.194268	3.34426	0.323565	0.0420734	0.0711473	0.0612082	0.0711473
cwo	3.69e-06	2.68e-05	0.278015	0.0600719	7.86462	0.0306868	0.000385195	0.0101826	0.0104407	0.0104407
His2A:CG33808	3.7e-06	2.68e-05	-0.578158	0.124933	9.36603	0.133732	0.00162104	0.0452039	0.0118102	0.0452039
Gli	3.7e-06	2.69e-05	0.72392	0.156442	6.17413	0.209673	0.00240546	0.071017	0.020963	0.071017
CG18131	3.7e-06	2.69e-05	1.41735	0.306295	2.38818	0.671062	0.179381	-0.0438755	0.10207	0.10207
CG6125	3.71e-06	2.69e-05	-0.506235	0.109411	6.70867	0.10254	0.00124101	0.034671	0.0152421	0.034671
CG4009	3.76e-06	2.73e-05	0.829812	0.179459	8.88324	0.27563	0.000149369	0.096467	0.0106799	0.096467
tj	3.79e-06	2.74e-05	0.611986	0.132392	7.5823	0.149946	0.000502891	0.0520799	0.0108309	0.0520799
Nepl4	3.8e-06	2.75e-05	-0.905437	0.195896	5.61375	0.328246	0.00436899	0.110757	0.026834	0.110757
Sec24CD	3.81e-06	2.76e-05	0.6414	0.138792	8.50282	0.164734	0.000221361	0.0575679	0.0102713	0.0575679
CG3857	3.83e-06	2.76e-05	-0.337765	0.0730991	7.01717	0.0456872	0.000895811	0.0151346	0.0128875	0.0151346
CG42700	3.85e-06	2.77e-05	-0.603971	0.130745	5.38831	0.146106	0.00653919	0.0447433	0.0294487	0.0447433
Wnt2	3.85e-06	2.77e-05	-0.632069	0.136825	4.30875	0.144239	0.0139655	0.0248443	0.0421975	0.0421975
CG5916	3.85e-06	2.77e-05	0.334254	0.0723565	7.71214	0.0447493	0.000431356	0.0152751	0.0106034	0.0152751
imd	3.85e-06	2.78e-05	0.366575	0.0793599	6.5195	0.0505151	0.0016266	0.0136269	0.0172674	0.0172674
CG8560	3.88e-06	2.8e-05	-1.37373	0.297496	8.32888	0.756049	0.000347246	0.265165	0.0102066	0.265165
CG17121	3.94e-06	2.83e-05	-0.429354	0.0930392	6.0569	0.0738838	0.00224443	0.0237245	0.0220994	0.0237245
CG16743	3.94e-06	2.83e-05	0.68121	0.147623	5.7395	0.185992	0.0046546	0.0607226	0.0254277	0.0607226
CG32982	3.97e-06	2.86e-05	-0.45849	0.0993944	5.74506	0.0718545	0.00427121	0.0117049	0.0253665	0.0253665
fab1	3.99e-06	2.87e-05	0.29253	0.063428	7.28024	0.0335025	0.000343217	0.0108373	0.0117261	0.0117261
MagR	4e-06	2.87e-05	-0.347416	0.0753404	6.9853	0.048398	0.000939145	0.0160894	0.0130592	0.0160894
Tps1	4.01e-06	2.88e-05	0.593016	0.128616	8.55068	0.141024	0.000225088	0.0494008	0.0103027	0.0494008
babo	4.02e-06	2.88e-05	0.350549	0.0760346	8.40737	0.0492811	0.000222494	0.0171213	0.0102257	0.0171213
Ccn	4.02e-06	2.88e-05	-0.695845	0.150936	3.96651	0.194186	0.0180897	0.0502551	0.0470604	0.0502551
crol	4.03e-06	2.88e-05	0.310142	0.0672764	8.82069	0.0385771	0.000153067	0.0134253	0.0105857	0.0134253
Pgm1	4.06e-06	2.91e-05	0.285494	0.061954	9.23597	0.0308281	8.35e-05	0.00937535	0.0114314	0.0114314
Pc	4.07e-06	2.91e-05	0.294885	0.0640001	7.31739	0.0316038	0.000694289	0.00798276	0.0115937	0.0115937
Dtd	4.1e-06	2.93e-05	-0.719287	0.156163	4.47311	0.207611	0.0145195	0.058641	0.0401975	0.058641
skd	4.11e-06	2.94e-05	0.507698	0.110233	9.32882	0.103437	0.000103968	0.0363497	0.0116958	0.0363497
Optix	4.12e-06	2.94e-05	-0.76094	0.165232	3.73355	0.197454	0.0305904	0.0129007	0.0513142	0.0513142
tx	4.13e-06	2.94e-05	-0.636202	0.138157	4.34516	0.133259	0.0155205	0.00963875	0.0417419	0.0417419
CG7806	4.14e-06	2.95e-05	0.349444	0.0758981	7.78895	0.0490137	0.000424872	0.0168567	0.0105116	0.0168567
CG10339	4.14e-06	2.95e-05	-0.851622	0.184966	3.36947	0.26467	0.0421762	0.0313828	0.0604611	0.0604611
lncRNA:CR45232	4.14e-06	2.95e-05	0.799875	0.173729	3.6225	0.239517	0.0368028	0.0347259	0.0537423	0.0537423
CG15739	4.15e-06	2.95e-05	0.51634	0.112158	5.67083	0.107018	0.00362185	0.0341162	0.0261903	0.0341162
CG8157	4.21e-06	3e-05	0.643628	0.1399	5.4154	0.166357	0.00725934	0.0514566	0.0291293	0.0514566
lncRNA:CR43461	4.22e-06	3e-05	-0.804352	0.174844	4.83558	0.259823	0.00887614	0.0828347	0.0360254	0.0828347
CG12075	4.24e-06	3.01e-05	0.705551	0.153399	6.57616	0.199941	0.00141095	0.0691829	0.016634	0.0691829
CG17470	4.3e-06	3.06e-05	-0.679965	0.147942	3.98643	0.178672	0.0189213	0.0389122	0.0467396	0.0467396
CG43207	4.32e-06	3.07e-05	-1.31105	0.285297	2.31549	0.642544	0.137747	0.053392	0.106437	0.106437
Osi19	4.34e-06	3.08e-05	2.77235	0.603422	3.13724	3.08921	0.0620218	1.03033	0.0678813	1.03033
Vdup1	4.35e-06	3.08e-05	-0.436118	0.0949342	5.87393	0.0640648	0.00306141	0.0103501	0.0239761	0.0239761
Lar	4.37e-06	3.09e-05	0.557188	0.12131	7.71169	0.124806	0.000508136	0.0436404	0.010604	0.0436404
Hrd3	4.4e-06	3.11e-05	0.271431	0.0591144	8.32588	0.0259766	0.000277332	0.0061944	0.0102062	0.0102062
CG17572	4.4e-06	3.11e-05	-0.685305	0.149255	3.98313	0.161648	0.0200386	0.0168813	0.0467923	0.0467923
NtR	4.47e-06	3.16e-05	0.889437	0.19385	5.17863	0.318239	0.00639261	0.106341	0.0319487	0.106341
RapGAP1	4.47e-06	3.16e-05	0.350807	0.0764616	7.86988	0.049508	0.000384894	0.0171542	0.0104363	0.0171542
CG17047	4.48e-06	3.17e-05	-1.17864	0.256916	2.65011	0.521309	0.109979	0.0467003	0.0880378	0.0880378
Pgant4	4.49e-06	3.17e-05	-0.655948	0.142996	6.32838	0.173113	0.00202465	0.0593191	0.0194203	0.0593191
asRNA:CR45214	4.56e-06	3.21e-05	-1.50344	0.327961	5.06794	0.909791	0.0393934	0.283281	0.0332772	0.283281
mthl1	4.59e-06	3.23e-05	0.309275	0.067486	7.03736	0.0294419	0.000880331	0.00281052	0.0127828	0.0127828
CG30043	4.67e-06	3.29e-05	-2.55471	0.55789	2.90241	2.62881	0.0923988	0.841325	0.0767398	0.841325
PGRP-LA	4.67e-06	3.29e-05	-0.532121	0.116207	5.25686	0.0942331	0.00950064	0.00921004	0.0310114	0.0310114
armi	4.68e-06	3.29e-05	0.322898	0.0705227	8.67102	0.0419994	0.000208987	0.0147114	0.010405	0.0147114
dom	4.7e-06	3.3e-05	0.49884	0.108967	10.1695	0.100249	5.24e-05	0.0355693	0.0156806	0.0355693
PH4alphaNE1	4.75e-06	3.34e-05	-1.7016	0.371909	1.68435	1.16689	0.241787	0.173162	0.155066	0.173162
how	4.76e-06	3.34e-05	0.338236	0.0739288	7.99262	0.0461068	0.000396673	0.0159997	0.0103402	0.0159997
CG13315	4.83e-06	3.39e-05	0.617886	0.135147	8.62127	0.153936	0.000174542	0.0546198	0.0103586	0.0546198
CG3703	4.87e-06	3.41e-05	-0.579576	0.126808	4.69953	0.113625	0.0106551	0.01356	0.0375856	0.0375856
CG4911	4.87e-06	3.42e-05	0.350918	0.0767829	8.59236	0.0496635	0.0001513	0.0175356	0.0103344	0.0175356
CG2065	4.89e-06	3.43e-05	0.529382	0.115851	5.01393	0.0981797	0.00633987	0.0175841	0.0339242	0.0339242
spi	4.89e-06	3.43e-05	-0.277243	0.0606744	7.69369	0.0258961	0.000414661	0.00501192	0.0106295	0.0106295
CG1486	4.93e-06	3.45e-05	0.272762	0.0597175	8.00037	0.0271132	0.000364401	0.00714039	0.0103342	0.0103342
CG8602	4.97e-06	3.47e-05	0.269899	0.0591078	8.52536	0.0282182	0.000195787	0.00899056	0.0102854	0.0102854
Doc2	4.98e-06	3.48e-05	-1.36098	0.298079	2.52034	0.747483	0.143409	0.123143	0.0946715	0.123143
Sln	4.99e-06	3.49e-05	-0.647994	0.141946	4.13715	0.126841	0.0159642	-0.00240836	0.0444815	0.0444815
puf	5.02e-06	3.51e-05	0.610213	0.133705	8.52554	0.150309	0.000213489	0.0534179	0.0102855	0.0534179
Cals	5.03e-06	3.51e-05	0.412462	0.0903802	7.90549	0.0686758	0.000385187	0.0241206	0.0104074	0.0241206
CG8281	5.09e-06	3.55e-05	-0.38509	0.084428	6.32064	0.044117	0.00188021	0.00216035	0.0195041	0.0195041
AOX4	5.09e-06	3.55e-05	-0.848086	0.18594	3.35235	0.221585	0.042754	-0.0147851	0.060967	0.060967
Gs1	5.1e-06	3.55e-05	0.281438	0.0617127	9.18785	0.0298411	0.000119557	0.00894353	0.0113058	0.0113058
CG46385	5.11e-06	3.56e-05	0.323583	0.0709601	10.0754	0.0331603	4e-05	0.0050245	0.015066	0.015066
dpr5	5.12e-06	3.56e-05	-0.773483	0.169636	3.60964	0.212494	0.0322855	0.0219752	0.0540437	0.0540437
LManII	5.22e-06	3.63e-05	0.777735	0.17072	7.9025	0.244452	0.000350142	0.0870854	0.0104097	0.0870854
Pi3K21B	5.25e-06	3.65e-05	0.268983	0.0590597	8.45111	0.021967	0.000220455	0.00223771	0.0102437	0.0102437
CG5618	5.25e-06	3.65e-05	0.408156	0.0896191	6.10498	0.0642431	0.0024679	0.0182221	0.0216269	0.0216269
Cyp4d20	5.28e-06	3.67e-05	0.533145	0.117092	5.16477	0.114913	0.00525557	0.0358763	0.0321149	0.0358763
CG5707	5.31e-06	3.68e-05	0.334464	0.0734741	6.74248	0.0385249	0.00127972	0.00753787	0.0149156	0.0149156
AdamTS-A	5.39e-06	3.74e-05	0.626387	0.137702	6.52694	0.158722	0.00154434	0.0553415	0.0171834	0.0553415
Dyrk2	5.43e-06	3.76e-05	0.501702	0.110327	7.6268	0.101844	0.000520827	0.0359956	0.0107404	0.0359956
CG4554	5.44e-06	3.77e-05	0.33783	0.074298	8.11895	0.0461812	0.000334921	0.0162257	0.0102477	0.0162257
IntS1	5.52e-06	3.82e-05	0.340501	0.074934	8.31321	0.0469343	0.000236423	0.0166089	0.0102049	0.0166089
CG6761	5.54e-06	3.83e-05	-0.772161	0.169952	3.62868	0.212092	0.0330523	0.0213796	0.0535991	0.0535991
Sema1a	5.54e-06	3.83e-05	0.324531	0.0714337	6.81858	0.0319431	0.00107345	0.00246793	0.0142349	0.0142349
CG33557	5.55e-06	3.83e-05	-0.981695	0.216101	3.0082	0.345071	0.0675319	0.0229286	0.0725667	0.0725667
CG9541	5.58e-06	3.85e-05	-0.767177	0.168923	3.78716	0.214906	0.0353617	0.0244671	0.0502435	0.0502435
Mical	5.6e-06	3.86e-05	0.378271	0.0833037	9.13821	0.0579502	0.000452971	0.0203655	0.0111842	0.0203655
Cyp6a16	5.6e-06	3.86e-05	-1.24537	0.274252	2.57837	0.601176	0.134012	0.0619958	0.0916307	0.0916307
udd	5.61e-06	3.87e-05	-0.398145	0.0876857	6.98154	0.0642019	0.000977573	0.0220888	0.0130803	0.0220888
kek1	5.63e-06	3.88e-05	-0.411685	0.0906831	6.40529	0.0686505	0.00162638	0.0230439	0.0185654	0.0230439
CG12780	5.69e-06	3.92e-05	-1.23417	0.27199	2.93914	0.617171	0.0791714	0.142764	0.0752557	0.142764
Tsp66E	5.7e-06	3.92e-05	0.267925	0.0590518	8.46496	0.0232182	0.000210923	0.00379399	0.0102504	0.0102504
CG13794	5.71e-06	3.93e-05	0.552006	0.121674	4.87942	0.105927	0.00889726	0.0162091	0.0355166	0.0355166
Camta	5.75e-06	3.95e-05	0.454787	0.100274	7.30649	0.0838308	0.000726599	0.0294379	0.0116319	0.0294379
nos	5.78e-06	3.97e-05	0.363391	0.0801437	9.63062	0.0535319	6.49e-05	0.0192041	0.0127713	0.0192041
CG30419	5.79e-06	3.97e-05	-0.737219	0.162605	3.72964	0.205318	0.0279263	0.0348754	0.0513947	0.0513947
CG17169	5.83e-06	4e-05	0.653834	0.144254	6.02689	0.173343	0.00227016	0.0601579	0.0223989	0.0601579
Nox	5.85e-06	4.01e-05	0.98541	0.217451	6.89468	0.393786	0.00125995	0.140595	0.0136399	0.140595
CG9467	5.87e-06	4.02e-05	0.380383	0.0839526	8.21455	0.0586832	0.000266965	0.0208772	0.0102113	0.0208772
CG13833	6e-06	4.11e-05	-0.516809	0.114179	5.36734	0.108399	0.00573959	0.0333712	0.0296966	0.0333712
DIP-gamma	6.01e-06	4.11e-05	-0.654328	0.144565	4.07483	0.154553	0.0173157	0.0242493	0.0453814	0.0453814
vas	6.06e-06	4.14e-05	0.284209	0.0628192	9.34753	0.0231702	8.6e-05	0.0011687	0.0117527	0.0117527
CG33307	6.2e-06	4.23e-05	0.767946	0.169915	5.62765	0.239578	0.00903762	0.0775756	0.0266764	0.0775756
E5	6.26e-06	4.27e-05	-0.755475	0.167236	3.59011	0.195873	0.0293935	0.014844	0.05451	0.05451
Octbeta3R	6.35e-06	4.33e-05	-0.635587	0.140793	4.28755	0.14273	0.0170015	0.0188097	0.0424668	0.0424668
Tl	6.36e-06	4.34e-05	0.529443	0.117287	9.06184	0.113965	0.00011278	0.0411561	0.0110123	0.0411561
CG12910	6.37e-06	4.34e-05	-0.597872	0.132453	4.86176	0.145334	0.00881479	0.0438169	0.035722	0.0438169
corto	6.41e-06	4.37e-05	0.272768	0.0604495	8.96335	0.0296122	0.00014521	0.0101075	0.0108172	0.0108172
alpha4GT1	6.43e-06	4.38e-05	0.284343	0.0630237	7.39629	0.0309921	0.000581359	0.00925472	0.0113346	0.0113346
Usp7	6.46e-06	4.39e-05	0.346712	0.0768624	9.20346	0.0488966	9.19e-05	0.0176316	0.0113457	0.0176316
lncRNA:CR44024	6.47e-06	4.4e-05	-0.601801	0.133425	4.4142	0.115365	0.0125081	0.00574374	0.040899	0.040899
HDAC4	6.49e-06	4.41e-05	0.266873	0.0591763	8.50704	0.0237444	0.000231637	0.00452085	0.0102739	0.0102739
Tpst	6.49e-06	4.41e-05	0.271679	0.0602433	7.82098	0.0235075	0.000408017	0.00330751	0.0104797	0.0104797
CG43324	6.51e-06	4.42e-05	-0.597519	0.132514	4.47849	0.141353	0.0125454	0.0358345	0.0401341	0.0401341
larp	6.53e-06	4.43e-05	0.283886	0.0629679	9.36383	0.0282229	9.16e-05	0.00677619	0.0118033	0.0118033
CG15533	6.55e-06	4.44e-05	3.52807	0.78267	2.51468	5.06537	0.0996106	1.7381	0.0949747	1.7381
ss	6.57e-06	4.45e-05	-0.634531	0.14078	4.22256	0.142551	0.0161439	0.0198737	0.0433132	0.0433132
CG10345	6.67e-06	4.51e-05	-0.41523	0.0921915	6.22671	0.0702024	0.00205562	0.0234422	0.0204677	0.0234422
CG31267	6.67e-06	4.51e-05	-2.56722	0.569978	4.81995	2.68346	0.025245	0.949378	0.0362059	0.949378
trx	6.72e-06	4.55e-05	0.506256	0.112445	8.42459	0.104382	0.000231356	0.0377006	0.0102322	0.0377006
MTF-1	6.73e-06	4.55e-05	0.424506	0.0942925	7.29081	0.0733952	0.000951008	0.0257222	0.0116878	0.0257222
Desat1	6.73e-06	4.55e-05	0.317084	0.0704317	9.91773	0.0409496	5.58e-05	0.0148261	0.0141437	0.0148261
Impbeta11	6.74e-06	4.55e-05	0.269667	0.0599029	8.14361	0.0296192	0.000299303	0.0104658	0.0102353	0.0104658
LUBEL	6.75e-06	4.56e-05	-0.451504	0.100305	6.18386	0.0830364	0.00538648	0.0247967	0.0208711	0.0247967
CG6409	6.76e-06	4.56e-05	-0.521679	0.115899	8.7236	0.110857	0.000211342	0.0400864	0.0104614	0.0400864
otu	6.81e-06	4.59e-05	0.515736	0.11462	9.82593	0.108371	5.85e-05	0.039355	0.0136641	0.039355
Frl	6.88e-06	4.63e-05	0.269126	0.05984	7.94624	0.0263519	0.000366692	0.00689164	0.0103758	0.0103758
wgn	6.93e-06	4.66e-05	-0.430432	0.0957389	6.52172	0.0755266	0.0013608	0.026137	0.0172424	0.026137
CG11417	6.98e-06	4.7e-05	-0.325802	0.0724934	8.52808	0.0432817	0.000206454	0.0155594	0.0102872	0.0155594
CG6073	7.03e-06	4.72e-05	-0.31401	0.0698902	7.64758	0.0402133	0.000516714	0.0141372	0.010703	0.0141372
Mur29B	7.04e-06	4.73e-05	-0.8389	0.186731	5.94605	0.287029	0.0029356	0.10167	0.023222	0.10167
CG8360	7.05e-06	4.74e-05	0.334576	0.0744819	6.70389	0.0429058	0.00135324	0.0122608	0.0152894	0.0152894
CG14853	7.07e-06	4.75e-05	-0.559897	0.124656	4.61213	0.115088	0.00803269	0.0245193	0.0385847	0.0385847
dsd	7.08e-06	4.75e-05	0.420971	0.0937308	8.29118	0.0722921	0.000274642	0.0260817	0.0102037	0.0260817
CG5191	7.08e-06	4.75e-05	0.310026	0.0690284	7.92396	0.0392088	0.000407341	0.0138874	0.0103929	0.0138874
CG5001	7.09e-06	4.75e-05	-0.371511	0.082724	6.38465	0.0556938	0.00173177	0.0181252	0.018798	0.018798
CG6769	7.12e-06	4.77e-05	-0.319648	0.0711878	7.77136	0.0416869	0.000378339	0.0148248	0.0105305	0.0148248
GCC185	7.13e-06	4.77e-05	0.357247	0.0795684	7.53128	0.0520735	0.000542804	0.0184506	0.0109535	0.0184506
TkR99D	7.19e-06	4.81e-05	-0.777439	0.173224	3.54333	0.225591	0.0343489	0.0324777	0.0556705	0.0556705
CG31706	7.23e-06	4.84e-05	-0.600084	0.133748	4.76859	0.146996	0.0102382	0.0434273	0.0367961	0.0434273
CG42566	7.44e-06	4.97e-05	-0.409919	0.0914867	6.32696	0.068654	0.00280274	0.0223067	0.0194356	0.0223067
CG2121	7.45e-06	4.98e-05	-0.546461	0.121969	4.78541	0.100963	0.00802649	0.0134473	0.0366032	0.0366032
CG18178	7.47e-06	4.99e-05	-0.267218	0.05965	8.02199	0.0275569	0.000357369	0.00853347	0.010317	0.010317
CG2767	7.5e-06	5e-05	0.271327	0.0605779	7.72552	0.0278318	0.000423486	0.00810603	0.0105856	0.0105856
CG11077	7.53e-06	5.02e-05	-0.343533	0.076713	6.99909	0.0482356	0.00130351	0.0163512	0.0129838	0.0163512
CG17270	7.55e-06	5.03e-05	0.31858	0.0711506	6.83812	0.0315776	0.00111375	0.00317359	0.0140735	0.0140735
CG17261	7.61e-06	5.07e-05	-0.933469	0.208558	3.59533	0.356271	0.0323053	0.0981836	0.0543843	0.0981836
bi	7.66e-06	5.1e-05	-0.604725	0.135148	4.34063	0.127526	0.0129967	0.0175744	0.0417981	0.0417981
CG34291	7.76e-06	5.16e-05	2.8816	0.644399	3.15178	3.39712	0.0760207	1.16973	0.0673796	1.16973
CG12038	7.76e-06	5.16e-05	-0.621051	0.138884	4.27953	0.132897	0.0152973	0.0151782	0.0425694	0.0425694
Sec23	7.78e-06	5.17e-05	0.269111	0.0601892	8.91471	0.0205518	0.000136625	0.000744127	0.0107316	0.0107316
anchor	7.79e-06	5.17e-05	0.275388	0.0615958	7.84178	0.0310306	0.000459091	0.010923	0.0104606	0.010923
Vajk1	7.8e-06	5.18e-05	-1.12789	0.252294	2.56945	0.481051	0.0988662	0.0486521	0.0920904	0.0920904
CG18788	7.81e-06	5.18e-05	-1.02198	0.228613	2.79551	0.374033	0.0755071	0.0225971	0.0812843	0.0812843
Rpn13R	7.85e-06	5.2e-05	-1.23538	0.276418	2.44937	0.602473	0.130661	0.0742113	0.0985599	0.0985599
eas	7.89e-06	5.23e-05	0.265369	0.0593927	8.1281	0.0276403	0.000339604	0.00893857	0.0102429	0.0102429
CG7339	7.89e-06	5.23e-05	-0.295346	0.0661006	7.17714	0.0355359	0.000976146	0.0119445	0.0121317	0.0121317
CG11029	7.94e-06	5.25e-05	-0.539985	0.120885	4.91533	0.10549	0.00874355	0.0198198	0.0350962	0.0350962
MtnA	7.95e-06	5.26e-05	-0.736017	0.164783	8.48267	0.221797	0.000478471	0.0809816	0.0102598	0.0809816
CG9897	7.99e-06	5.28e-05	-0.449908	0.100755	5.62306	0.0811322	0.00372623	0.0247941	0.0267284	0.0267284
CG10725	7.99e-06	5.28e-05	-1.07818	0.241454	4.80738	0.476036	0.0101249	0.164775	0.0363507	0.164775
CG7156	7.99e-06	5.28e-05	0.325801	0.0729601	7.5583	0.0434667	0.000513927	0.0154556	0.0108861	0.0154556
CG11034	8e-06	5.28e-05	0.377523	0.0845479	7.33839	0.0583656	0.000639651	0.0208054	0.0115219	0.0208054
CG43678	8.06e-06	5.32e-05	-1.88727	0.422826	1.40175	1.45898	0.193016	0.343329	0.18457	0.343329
Atg17	8.13e-06	5.36e-05	0.397995	0.0892037	8.60134	0.0649017	0.000180939	0.023691	0.0103417	0.023691
ICA69	8.35e-06	5.5e-05	-0.644698	0.144684	4.2056	0.158151	0.0192607	0.0300147	0.0435397	0.0435397
Tao	8.4e-06	5.53e-05	0.336496	0.0755355	9.64503	0.0464415	8.8e-05	0.0170289	0.0128316	0.0170289
CG31121	8.46e-06	5.57e-05	0.391952	0.0880164	6.19544	0.063026	0.00191936	0.0213213	0.0207622	0.0213213
CG9098	8.48e-06	5.58e-05	0.437548	0.0982661	5.71896	0.0728269	0.00331429	0.0193608	0.0256544	0.0256544
Max	8.55e-06	5.62e-05	-0.359746	0.080823	7.22739	0.0531112	0.000787154	0.0188099	0.0119268	0.0188099
Ptp36E	8.56e-06	5.62e-05	-0.486028	0.109204	5.79013	0.0969486	0.0029095	0.0328669	0.0248742	0.0328669
mfas	8.6e-06	5.65e-05	0.430371	0.0967208	8.26113	0.0760279	0.000288673	0.0277761	0.0102045	0.0277761
CG10341	8.64e-06	5.67e-05	-0.278108	0.0625156	7.44758	0.0282445	0.000543579	0.00732218	0.011181	0.011181
CG31751	8.78e-06	5.75e-05	0.342115	0.0769605	6.6026	0.0467588	0.00142419	0.0148977	0.0163446	0.0163446
CG16978	8.79e-06	5.76e-05	0.624084	0.140402	4.2299	0.146143	0.0159223	0.0279906	0.0432159	0.0432159
Dlip2	8.88e-06	5.81e-05	-0.342147	0.0770099	6.59968	0.0408458	0.00141523	0.00839574	0.0163763	0.0163763
CG2811	8.89e-06	5.82e-05	-0.374966	0.0844048	7.15126	0.057775	0.00109508	0.0202774	0.012243	0.0202774
VGAT	8.91e-06	5.83e-05	-0.533977	0.120209	4.8703	0.106952	0.00772806	0.0243792	0.0356228	0.0356228
CycT	8.99e-06	5.88e-05	0.332321	0.0748438	9.01857	0.0453963	0.000148339	0.0166565	0.010923	0.0166565
CG5080	9e-06	5.88e-05	0.439693	0.0990327	7.0607	0.0794741	0.00116171	0.0282607	0.0126652	0.0282607
tea	9.02e-06	5.89e-05	0.357827	0.0806009	7.38467	0.0526378	0.000523724	0.0189658	0.0113709	0.0189658
EMRE	9.09e-06	5.93e-05	-0.278433	0.0627418	7.45669	0.0318792	0.000610021	0.0111996	0.0111549	0.0111996
CG3588	9.16e-06	5.98e-05	-0.423042	0.0953631	5.91905	0.0736107	0.00292443	0.0243579	0.0235022	0.0243579
Ddc	9.17e-06	5.98e-05	-0.338964	0.0764136	6.61407	0.0446381	0.00129658	0.0133364	0.0162205	0.0162205
lncRNA:CR43432	9.19e-06	5.99e-05	-1.45275	0.327543	4.07452	0.868181	0.0350247	0.286828	0.0453859	0.286828
CG4716	9.22e-06	6e-05	-1.16657	0.263052	7.11468	0.559868	0.000953806	0.206636	0.0124072	0.206636
CG42638	9.32e-06	6.07e-05	0.332305	0.0749738	7.21846	0.0454465	0.00036507	0.0164982	0.0119621	0.0164982
Trpml	9.32e-06	6.07e-05	0.332305	0.0749738	7.21846	0.0454465	0.00036507	0.0164982	0.0119621	0.0164982
Mi-2	9.45e-06	6.14e-05	0.351274	0.0793041	9.73405	0.050805	6.44e-05	0.018803	0.0132233	0.018803
mura	9.45e-06	6.14e-05	0.348429	0.0786642	7.57726	0.0499863	0.000475854	0.0180883	0.0108421	0.0180883
Mal-A8	9.6e-06	6.24e-05	2.64783	0.598251	4.57062	2.88819	0.0355552	1.03816	0.0390618	1.03816
ec	9.64e-06	6.26e-05	0.484418	0.10947	5.55545	0.0966813	0.00370571	0.0322456	0.0274999	0.0322456
TotA	9.86e-06	6.4e-05	2.28638	0.517267	5.69018	2.15541	0.00802849	0.794667	0.025974	0.794667
asRNA:CR45209	9.88e-06	6.4e-05	-0.924567	0.209186	3.43779	0.289198	0.072773	-0.0111023	0.0585035	0.0585035
CG12772	9.89e-06	6.41e-05	0.311702	0.0705274	6.86405	0.0331715	0.00105408	0.00628708	0.0138683	0.0138683
aop	9.91e-06	6.42e-05	0.293961	0.06652	8.05046	0.0356351	0.00030061	0.0129741	0.0102937	0.0129741
CG8562	9.98e-06	6.46e-05	-1.03126	0.233445	7.40318	0.438672	0.000777876	0.162712	0.0113133	0.162712
Khc-73	1e-05	6.47e-05	0.471126	0.106658	7.84104	0.0915595	0.000451676	0.0336759	0.0104613	0.0336759
Grasp65	1e-05	6.47e-05	0.263372	0.0596267	7.99222	0.0215757	0.000325504	0.00259832	0.0103405	0.0103405
bon	1.01e-05	6.55e-05	0.389468	0.0882273	8.76325	0.062598	0.000164295	0.0231878	0.0105089	0.0231878
CG14721	1.02e-05	6.56e-05	-0.293032	0.0663912	7.12196	0.0287086	0.000849519	0.0049695	0.0123739	0.0123739
Top1	1.02e-05	6.58e-05	0.304533	0.0690061	9.92894	0.0336864	8.04e-05	0.00915251	0.0142051	0.0142051
Atg101	1.03e-05	6.61e-05	-0.307201	0.0696323	6.89619	0.0364462	0.000916958	0.0108621	0.013629	0.013629
C3G	1.03e-05	6.62e-05	0.289289	0.0655756	7.99358	0.0345518	0.000390257	0.0125102	0.0103395	0.0125102
Evi5	1.03e-05	6.64e-05	0.263203	0.0596741	8.05105	0.0227684	0.000389769	0.00387276	0.0102932	0.0102932
brat	1.04e-05	6.68e-05	0.422701	0.0958636	9.42812	0.0737931	9.5e-05	0.0274745	0.012012	0.0274745
CG9368	1.04e-05	6.68e-05	-0.643793	0.146012	4.01835	0.148089	0.0177218	0.0208346	0.0462371	0.0462371
bnl	1.04e-05	6.68e-05	-0.621984	0.141073	5.03586	0.159785	0.00619141	0.0535134	0.0336617	0.0535134
Cyp28d2	1.05e-05	6.76e-05	-0.846651	0.19214	3.22209	0.266123	0.0457268	0.0319637	0.0650263	0.0650263
zld	1.05e-05	6.76e-05	0.353744	0.0802825	9.01152	0.0517058	0.000125739	0.0192101	0.0109089	0.0192101
Syt1	1.05e-05	6.77e-05	-0.296855	0.0673769	7.10591	0.0364144	0.000770033	0.0128489	0.0124479	0.0128489
GluRIIE	1.07e-05	6.89e-05	-0.516403	0.117316	4.98358	0.0910226	0.00700208	0.0131211	0.0342869	0.0342869
CG43149	1.08e-05	6.94e-05	-0.81482	0.185194	3.27316	0.234573	0.0395007	0.0193496	0.0633895	0.0633895
CG15099	1.08e-05	6.94e-05	0.430215	0.0977814	8.47502	0.0765538	0.000213313	0.0284703	0.0102556	0.0284703
Psc	1.08e-05	6.94e-05	0.267344	0.060762	7.66798	0.0245264	0.000407139	0.00513003	0.0106689	0.0106689
CG17361	1.09e-05	6.96e-05	-0.374355	0.0850994	6.99501	0.0579711	0.000847412	0.0208783	0.0130059	0.0208783
CG12118	1.09e-05	6.98e-05	-0.282352	0.0641924	7.31385	0.0312307	0.000755919	0.00968113	0.0116061	0.0116061
net	1.09e-05	6.99e-05	-0.59706	0.13576	4.36794	0.126353	0.0138317	0.0182124	0.041461	0.041461
NetB	1.11e-05	7.08e-05	-0.498511	0.113425	5.07978	0.086429	0.00546079	0.0150571	0.0331352	0.0331352
CG14621	1.11e-05	7.08e-05	0.330251	0.0751438	7.57091	0.045145	0.000618535	0.0163212	0.0108565	0.0163212
BtbVII	1.11e-05	7.09e-05	0.274729	0.0625141	9.30356	0.0279753	0.000103073	0.00802683	0.011621	0.011621
esn	1.11e-05	7.09e-05	-0.639072	0.145431	4.06712	0.146851	0.0179547	0.0210574	0.0454959	0.0454959
lncRNA:CR43126	1.12e-05	7.13e-05	-0.779766	0.177501	3.26467	0.173013	0.0308622	-0.0229579	0.0636574	0.0636574
CG7460	1.13e-05	7.18e-05	0.417158	0.0949905	5.89425	0.0588225	0.00330781	0.00919056	0.0237618	0.0237618
sfl	1.13e-05	7.2e-05	0.409444	0.0932545	7.15927	0.0694387	0.000839039	0.0252502	0.0122082	0.0252502
Src64B	1.13e-05	7.21e-05	0.322196	0.0733866	8.52536	0.0429998	0.000192948	0.0159638	0.0102854	0.0159638
Qsox1	1.13e-05	7.22e-05	0.260048	0.059237	8.17236	0.0245382	0.000303527	0.00640104	0.0102235	0.0102235
lute	1.14e-05	7.24e-05	0.450843	0.102721	7.63962	0.0842115	0.000584089	0.0310707	0.010717	0.0310707
CG15117	1.14e-05	7.25e-05	0.453256	0.103275	5.88321	0.0851178	0.00298117	0.0290159	0.023878	0.0290159
CG2004	1.14e-05	7.25e-05	0.261556	0.059599	8.03339	0.0211054	0.000348418	0.00234415	0.0103077	0.0103077
SWIP	1.14e-05	7.25e-05	0.314393	0.0716371	6.82	0.029906	0.00117264	0.00207105	0.014223	0.014223
CG12316	1.16e-05	7.39e-05	0.269519	0.061475	8.30445	0.0301179	0.000259689	0.0110778	0.0102043	0.0110778
Pif1B	1.17e-05	7.41e-05	-0.388429	0.0886164	8.5649	0.0625653	0.000666232	0.0228924	0.0103131	0.0228924
cmet	1.17e-05	7.41e-05	0.489205	0.111606	8.37061	0.0992399	0.000219881	0.0371475	0.0102146	0.0371475
ogre	1.18e-05	7.48e-05	0.35612	0.0812858	7.76302	0.0526077	0.000397056	0.0194251	0.0105399	0.0194251
Kua	1.18e-05	7.5e-05	-0.521088	0.118957	5.00443	0.112647	0.00704162	0.0354108	0.0340379	0.0354108
CG15221	1.19e-05	7.51e-05	0.765354	0.174736	5.59171	0.243025	0.00420261	0.0873949	0.0270848	0.0873949
enc	1.19e-05	7.51e-05	0.435469	0.0994178	9.1012	0.0786742	0.000114303	0.0295374	0.0110986	0.0295374
Obp49a	1.19e-05	7.51e-05	-0.621884	0.141983	4.99687	0.160454	0.0074523	0.053025	0.0341281	0.053025
Ilp2	1.19e-05	7.51e-05	-0.59451	0.13574	4.90053	0.146645	0.00856379	0.0467126	0.0352698	0.0467126
CG8272	1.19e-05	7.55e-05	0.299152	0.0683228	6.97749	0.0267722	0.00090064	0.00170126	0.0131034	0.0131034
CG3301	1.2e-05	7.57e-05	0.49412	0.112866	5.92103	0.10133	0.00332381	0.0348927	0.0234816	0.0348927
nocte	1.21e-05	7.62e-05	0.504014	0.115171	9.65804	0.105457	6.8e-05	0.0397252	0.0128867	0.0397252
CG7518	1.21e-05	7.62e-05	0.261745	0.0598138	8.81757	0.025548	0.000151809	0.00739788	0.0105813	0.0105813
CG8777	1.22e-05	7.68e-05	0.417459	0.0954331	6.7568	0.0723673	0.00116553	0.0261569	0.0147816	0.0261569
AkhR	1.24e-05	7.79e-05	0.834971	0.191025	5.72114	0.289659	0.00405468	0.105418	0.0256302	0.105418
crb	1.24e-05	7.82e-05	0.42667	0.0976368	8.1902	0.0756482	0.000287795	0.0283111	0.0102176	0.0283111
mir-967	1.25e-05	7.88e-05	-1.14069	0.261127	3.09544	0.540832	0.0615359	0.143027	0.0693524	0.143027
TER94	1.26e-05	7.93e-05	0.405343	0.0928226	10.3126	0.0683081	3.4e-05	0.025814	0.0167157	0.025814
poe	1.27e-05	8.01e-05	0.494466	0.11329	9.5246	0.101684	7.62e-05	0.0384278	0.0123539	0.0384278
CG14024	1.28e-05	8.01e-05	-0.593093	0.135897	4.82681	0.146301	0.00766524	0.0477384	0.0361267	0.0477384
PICK1	1.28e-05	8.05e-05	-0.609877	0.139781	4.25462	0.117478	0.0157245	0.00191603	0.0428916	0.0428916
CG8405	1.28e-05	8.06e-05	0.259468	0.0594732	8.05214	0.0265803	0.000318815	0.00872237	0.0102924	0.0102924
CG8944	1.29e-05	8.06e-05	0.369595	0.0847187	8.21467	0.0568291	0.000265765	0.021266	0.0102113	0.021266
zetaTry	1.29e-05	8.07e-05	-2.24118	0.513778	4.72655	2.08978	0.0339677	0.757934	0.0372771	0.757934
GstD5	1.3e-05	8.15e-05	0.940981	0.215821	2.91665	0.304594	0.0635767	0.00584325	0.07616	0.07616
Scr	1.3e-05	8.17e-05	-0.623156	0.142944	4.10562	0.156472	0.0163678	0.0392541	0.0449312	0.0449312
klar	1.31e-05	8.21e-05	0.349245	0.0801384	9.68629	0.0507801	0.000140378	0.0191261	0.0130089	0.0191261
CG9121	1.32e-05	8.24e-05	-0.631581	0.144954	4.23485	0.129366	0.0198842	0.00275024	0.0431506	0.0431506
CG8008	1.32e-05	8.25e-05	-0.412706	0.0947232	5.88543	0.0600077	0.00306279	0.0118477	0.0238547	0.0238547
wdp	1.33e-05	8.31e-05	0.510752	0.117275	7.28646	0.108655	0.000788022	0.040472	0.0117035	0.040472
CG4101	1.33e-05	8.32e-05	-0.439326	0.100885	5.86934	0.0803959	0.00268887	0.0278445	0.0240247	0.0278445
alpha-1,6-	1.34e-05	8.36e-05	-0.375158	0.0861734	6.27259	0.0518236	0.00226681	0.012516	0.0200107	0.0200107
Acp65Aa	1.35e-05	8.41e-05	1.11485	0.256154	3.48369	0.517918	0.0401366	0.156709	0.0572418	0.156709
Tsp26A	1.35e-05	8.42e-05	0.444731	0.102192	5.55874	0.0717694	0.00386745	0.0157432	0.0274621	0.0274621
CG31104	1.35e-05	8.44e-05	1.54044	0.354039	4.7038	0.989018	0.0120364	0.363994	0.0375368	0.363994
Smr	1.37e-05	8.51e-05	0.279228	0.064202	9.5076	0.0294391	7.46e-05	0.00891788	0.0122911	0.0122911
lncRNA:CR43870	1.37e-05	8.56e-05	-0.874539	0.201143	3.10175	0.318928	0.0497555	0.0716197	0.0691273	0.0716197
SCaMC	1.4e-05	8.69e-05	0.25613	0.0589568	8.39641	0.0267862	0.000205688	0.00957842	0.010222	0.010222
CG13114	1.4e-05	8.71e-05	0.722952	0.166437	9.32703	0.218092	9.94e-05	0.0830044	0.0116905	0.0830044
dpr21	1.42e-05	8.82e-05	-0.617396	0.142227	4.1519	0.132768	0.0164106	0.0152812	0.0442747	0.0442747
CG11768	1.42e-05	8.84e-05	-0.636622	0.146682	3.69929	0.127373	0.012515	0.00600944	0.0520315	0.0520315
shn	1.43e-05	8.86e-05	0.266318	0.061368	7.59322	0.0288122	0.000490737	0.00992514	0.0108074	0.0108074
tadr	1.44e-05	8.93e-05	-0.456882	0.105322	5.4849	0.0640201	0.00496247	0.00283715	0.028316	0.028316
Mal-A2	1.44e-05	8.94e-05	1.50956	0.348021	5.03303	0.951804	0.00979741	0.353558	0.0336956	0.353558
Acer	1.44e-05	8.95e-05	0.675535	0.155753	8.48267	0.190619	0.000238415	0.0725388	0.0102598	0.0725388
CG8321	1.48e-05	9.15e-05	-0.271312	0.0626304	7.45592	0.0232759	0.000610553	0.00290997	0.0111571	0.0111571
spin	1.48e-05	9.15e-05	0.453684	0.104728	8.53614	0.0860479	0.000196869	0.032707	0.0102926	0.032707
Dlic	1.48e-05	9.16e-05	0.270521	0.0624556	9.03054	0.0305969	0.000150443	0.0115517	0.0109471	0.0115517
CG11529	1.48e-05	9.16e-05	0.747033	0.172466	3.64218	0.233319	0.030953	0.0582804	0.0532898	0.0582804
sba	1.49e-05	9.19e-05	0.30905	0.0713616	7.17808	0.0399373	0.000759397	0.014518	0.0121278	0.014518
Brd	1.49e-05	9.19e-05	-2.87783	0.664532	2.75798	3.46307	0.128382	1.19643	0.0829625	1.19643
CG40006	1.49e-05	9.21e-05	0.272853	0.0630165	7.40006	0.0307017	0.000590329	0.0108468	0.0113229	0.0113229
TpnC25D	1.49e-05	9.21e-05	-0.566808	0.130909	6.91068	0.134357	0.00110594	0.0503057	0.0135268	0.0503057
CG10407	1.51e-05	9.31e-05	0.755119	0.174503	8.35782	0.23856	0.000258618	0.0910957	0.0102116	0.0910957
CG9302	1.52e-05	9.36e-05	0.355894	0.0822697	8.17657	0.0530027	0.000294502	0.0200104	0.0102221	0.0200104
CG8012	1.53e-05	9.41e-05	0.454433	0.105077	6.23512	0.0864328	0.00267564	0.0304477	0.0203863	0.0304477
trn	1.53e-05	9.41e-05	-0.718255	0.166085	5.24944	0.215927	0.00677197	0.0759804	0.0311002	0.0759804
sl	1.54e-05	9.46e-05	0.612141	0.141588	7.81677	0.156869	0.000418768	0.0597228	0.0104838	0.0597228
Ugalt	1.55e-05	9.52e-05	0.325355	0.0752811	7.63604	0.0443259	0.000516558	0.0164852	0.0107234	0.0164852
lin-52	1.56e-05	9.58e-05	-0.301778	0.0698509	7.69378	0.038144	0.000724717	0.0139127	0.0106294	0.0139127
qsm	1.56e-05	9.59e-05	-0.347535	0.0804466	6.47788	0.03976	0.00167523	0.00582651	0.0177398	0.0177398
CG6765	1.56e-05	9.6e-05	-0.553302	0.128091	4.60699	0.10225	0.010578	0.0100539	0.0386437	0.0386437
Fer2LCH	1.56e-05	9.6e-05	0.41419	0.0958872	9.87915	0.0718627	6.07e-05	0.0275224	0.0139372	0.0275224
yellow-g2	1.57e-05	9.62e-05	0.620472	0.14366	9.32757	0.161282	8.64e-05	0.0618283	0.0116921	0.0618283
CG43232	1.58e-05	9.66e-05	-1.15069	0.266497	2.51639	0.549483	0.11818	0.0890243	0.0948828	0.0948828
Cyp6a2	1.58e-05	9.67e-05	0.575789	0.133358	7.07943	0.138921	0.000917265	0.0524355	0.0125735	0.0524355
Strumpellin	1.58e-05	9.7e-05	0.29421	0.0681563	6.99454	0.0313976	0.000927429	0.00764216	0.0130084	0.0130084
Hsepi	1.6e-05	9.79e-05	0.413941	0.0959406	6.9768	0.0718345	0.00104268	0.0265711	0.0131073	0.0265711
Vav	1.62e-05	9.89e-05	0.2613	0.0605946	7.78699	0.0234425	0.000501456	0.00480201	0.0105137	0.0105137
Grip163	1.62e-05	9.89e-05	0.543744	0.126093	7.41794	0.123996	0.000629359	0.0470689	0.0112684	0.0470689
ect	1.62e-05	9.92e-05	-0.562961	0.130577	4.52137	0.115679	0.0115189	0.0206505	0.0396322	0.0396322
CycY	1.63e-05	9.97e-05	0.289878	0.0672563	8.08346	0.0352536	0.000286906	0.0132833	0.0102694	0.0132833
CG10209	1.64e-05	9.99e-05	0.264988	0.061488	7.58302	0.0197375	0.000512967	0.000132646	0.0108293	0.0108293
CG15744	1.64e-05	9.99e-05	0.476373	0.110539	7.62575	0.0952146	0.000555867	0.0361008	0.0107424	0.0361008
Tgt	1.64e-05	0.000100317	-0.30476	0.0707361	6.84661	0.0277179	0.00100567	0.00162038	0.0140051	0.0140051
CG14606	1.68e-05	0.000102269	-0.767268	0.178268	4.97001	0.247226	0.00691144	0.0884265	0.0344488	0.0884265
nvy	1.68e-05	0.00010246	-0.611871	0.142182	4.24291	0.137134	0.0176023	0.020929	0.0430446	0.0430446
CG8206	1.68e-05	0.00010246	-0.262458	0.0609887	8.07521	0.028931	0.000372181	0.0107867	0.0102751	0.0107867
Mitf	1.68e-05	0.000102485	0.334054	0.077629	8.99318	0.0468695	0.000144888	0.0179339	0.0108732	0.0179339
CG34330	1.69e-05	0.000102609	-0.837108	0.194548	7.07995	0.294338	0.00107709	0.11247	0.012571	0.11247
Idgf4	1.7e-05	0.00010312	0.2768	0.0643481	9.52451	0.0237492	6.85e-05	0.00307012	0.0123536	0.0123536
CG7631	1.71e-05	0.000103721	2.91206	0.677192	1.96178	3.56345	0.152474	1.22329	0.131097	1.22329
Lip4	1.71e-05	0.000103754	0.719815	0.167398	6.43737	0.217733	0.00192969	0.0821368	0.0182012	0.0821368
Rich	1.74e-05	0.000105468	0.313216	0.0729042	8.05348	0.0412513	0.000320322	0.0156248	0.0102913	0.0156248
Fmr1	1.74e-05	0.000105571	0.26977	0.0627966	9.34286	0.0297246	9.18e-05	0.0107725	0.0117384	0.0117384
osp	1.76e-05	0.000106629	0.322059	0.0750089	7.98399	0.0436324	0.000328424	0.0165506	0.0103469	0.0165506
FAM21	1.76e-05	0.000106705	0.268676	0.0625797	7.45932	0.0239882	0.000601211	0.00412984	0.0111475	0.0111475
Sam-S	1.76e-05	0.000106942	0.309226	0.0720349	9.77809	0.0402303	5.74e-05	0.0155097	0.0134298	0.0155097
Acph-1	1.78e-05	0.000107686	0.253775	0.0591404	8.19518	0.0234277	0.000276571	0.00617327	0.0102162	0.0102162
CG10915	1.79e-05	0.00010811	0.379249	0.0884014	8.04897	0.0605395	0.000302467	0.023142	0.0102949	0.023142
Mct1	1.79e-05	0.000108116	0.280939	0.0654878	7.57223	0.0332219	0.000503052	0.0123629	0.0108535	0.0123629
CG14301	1.79e-05	0.000108286	-0.642978	0.149896	3.99793	0.149215	0.0208498	0.0192606	0.046557	0.046557
Teh4	1.8e-05	0.000108511	-0.688291	0.160482	3.75492	0.186163	0.0263831	0.0362731	0.0508801	0.0508801
snu	1.81e-05	0.000109462	0.6299	0.146938	7.27378	0.167095	0.00081653	0.0639555	0.0117499	0.0639555
unc-45	1.85e-05	0.000111452	0.265947	0.0620975	7.52634	0.0242005	0.000602092	0.00480011	0.0109662	0.0109662
CG5968	1.86e-05	0.000112382	-0.996906	0.232884	2.77104	0.385361	0.0803315	0.0454186	0.0823734	0.0823734
EMC1	1.86e-05	0.000112382	0.459647	0.107378	8.70608	0.089066	0.000172343	0.0344176	0.0104417	0.0344176
plh	1.87e-05	0.000112818	-0.745851	0.174278	6.20444	0.234551	0.00225129	0.0888668	0.020678	0.0888668
LPCAT	1.88e-05	0.0001131	0.264863	0.0618983	8.5028	0.0295818	0.000179478	0.0113147	0.0102713	0.0113147
Cpr100A	1.88e-05	0.000113374	0.790205	0.184699	4.06709	0.263334	0.0200222	0.0823185	0.0454962	0.0823185
Slob	1.9e-05	0.000114431	-0.393688	0.0920671	5.97066	0.0592458	0.00246013	0.0162133	0.0229689	0.0229689
PIG-Wb	1.9e-05	0.000114431	1.4566	0.340641	4.37408	0.8951	0.0190916	0.329017	0.0413857	0.329017
CG3107	1.9e-05	0.000114503	0.352762	0.0825022	8.82266	0.052502	0.000171072	0.0202488	0.0105885	0.0202488
CG30284	1.91e-05	0.000114889	-0.917392	0.214598	2.9676	0.304991	0.0640258	0.0189825	0.0741315	0.0741315
CG11360	1.92e-05	0.000115163	0.281054	0.0657547	7.20313	0.0287154	0.0009471	0.00694242	0.0120239	0.0120239
Nhe1	1.92e-05	0.000115507	0.290675	0.0680181	7.30434	0.0356609	0.000601903	0.0132775	0.0116395	0.0132775
CG34309	1.94e-05	0.00011613	-1.30947	0.306517	2.59213	0.578499	0.190931	-0.0689922	0.0909277	0.0909277
FBXO11	1.94e-05	0.00011613	0.52228	0.122255	8.61957	0.115156	0.000205961	0.0446327	0.0103572	0.0446327
CG12236	1.94e-05	0.000116236	0.275022	0.0643817	8.10876	0.0319329	0.0002791	0.0121559	0.0102535	0.0121559
beat-IV	1.95e-05	0.000116828	-0.647455	0.151611	4.07128	0.177015	0.0173241	0.0516336	0.045434	0.0516336
Spn47C	1.96e-05	0.000117067	-0.545508	0.127756	5.21898	0.125671	0.00553727	0.0434274	0.0314649	0.0434274
CG5742	1.98e-05	0.000118515	0.421672	0.09882	7.12794	0.0751258	0.000840962	0.0284552	0.0123467	0.0284552
p	1.98e-05	0.00011858	0.260394	0.0610275	7.6669	0.027214	0.000502406	0.00909152	0.0106706	0.0106706
Dhit	1.98e-05	0.000118596	-0.388412	0.0910337	7.66959	0.063746	0.000548632	0.0243128	0.0106663	0.0243128
Acbp6	2e-05	0.000119383	1.11825	0.262186	3.47198	0.528516	0.0602993	0.145925	0.0575597	0.145925
Mcr	2.01e-05	0.000120274	0.44356	0.104041	8.5534	0.0831791	0.000190283	0.0322832	0.0103046	0.0322832
CG8738	2.02e-05	0.000120363	0.493458	0.115752	5.03454	0.0816681	0.00651844	0.0102664	0.0336775	0.0336775
Pp2B-14D	2.02e-05	0.000120702	0.265062	0.0621875	9.25072	0.0262906	0.000130389	0.00771194	0.0114715	0.0114715
UK114	2.02e-05	0.000120733	0.410361	0.0962807	7.51097	0.0712079	0.000552569	0.0272574	0.0110062	0.0272574
Cnx99A	2.03e-05	0.000120832	0.261146	0.0612756	9.12441	0.0246919	0.000112361	0.00658953	0.0111517	0.0111517
CG3604	2.06e-05	0.000122834	-0.504597	0.118504	4.93519	0.0827741	0.00726779	0.00739843	0.0348621	0.0348621
tHMG2	2.07e-05	0.000123332	0.927006	0.21776	2.86245	0.262816	0.0638589	-0.032563	0.0783987	0.0783987
CG13077	2.09e-05	0.000124486	-0.499433	0.117381	5.05712	0.101614	0.00792767	0.0290176	0.033407	0.033407
CG8399	2.1e-05	0.000124659	0.288077	0.0677136	8.12763	0.0351381	0.000316635	0.0134388	0.0102431	0.0134388
CG15356	2.1e-05	0.000124659	0.401635	0.0944074	8.28341	0.0683014	0.000263151	0.0264751	0.0102037	0.0264751
Oamb	2.13e-05	0.000126267	0.507295	0.119327	5.99561	0.109019	0.00286014	0.0398567	0.0227146	0.0398567
CG30479	2.13e-05	0.000126318	-0.789961	0.185826	5.39589	0.264368	0.0203916	0.0832019	0.0293592	0.0832019
CG7739	2.17e-05	0.000128565	0.267205	0.0629159	7.42399	0.0288543	0.000624966	0.00969522	0.0112503	0.0112503
Cyp310a1	2.17e-05	0.000128675	-0.883454	0.208032	3.16879	0.33089	0.0550308	0.0748014	0.0667995	0.0748014
CG5902	2.17e-05	0.000128742	0.254062	0.0598304	7.96441	0.025049	0.000377116	0.0078125	0.0103619	0.0103619
CG43191	2.17e-05	0.000128742	-0.710693	0.167361	3.67622	0.203162	0.0314986	0.0404541	0.0525302	0.0525302
CG14866	2.18e-05	0.000128895	0.992095	0.233655	2.7726	0.378543	0.0814798	0.0396418	0.0823036	0.0823036
dnc	2.19e-05	0.000129462	-0.300508	0.070793	8.52176	0.0382969	0.000331187	0.0147037	0.0102831	0.0147037
Takl1	2.22e-05	0.000131123	-1.25601	0.296096	3.03806	0.669354	0.0951072	0.167911	0.0714441	0.167911
disp	2.24e-05	0.000132293	0.365697	0.0862533	7.79475	0.056763	0.000364494	0.0219544	0.0105056	0.0219544
retm	2.26e-05	0.000133425	0.393568	0.0928712	7.72723	0.0657672	0.000500001	0.0253752	0.0105833	0.0253752
abo	2.3e-05	0.000136027	0.30412	0.0718395	6.81396	0.028488	0.00120884	0.0023812	0.0142739	0.0142739
CG14830	2.3e-05	0.000136093	-0.426644	0.100788	6.04933	0.0773474	0.00229506	0.0281794	0.0221747	0.0281794
Aatf	2.31e-05	0.000136179	-0.255339	0.0603233	7.77749	0.0258203	0.000392883	0.00845003	0.0105238	0.0105238
baz	2.31e-05	0.000136241	0.253996	0.0600092	7.93253	0.0223624	0.000416998	0.0048274	0.0103863	0.0103863
veil	2.31e-05	0.000136381	0.685827	0.162047	7.16991	0.199896	0.000878075	0.0778993	0.0121624	0.0778993
CG12769	2.31e-05	0.000136405	0.401367	0.0948382	5.92265	0.0684651	0.00275095	0.0242319	0.0234648	0.0242319
CG7582	2.33e-05	0.000136946	-0.542582	0.128236	4.61984	0.11403	0.010837	0.0262779	0.0384964	0.0384964
Atg13	2.33e-05	0.000137012	0.251112	0.059352	8.12754	0.024843	0.000324814	0.0080853	0.0102432	0.0102432
alpha-Man-Ib	2.33e-05	0.000137034	0.330108	0.078026	8.32481	0.0463233	0.000218234	0.0180459	0.0102061	0.0180459
CG17233	2.35e-05	0.000138334	0.250028	0.059129	8.30701	0.0229443	0.000284289	0.0062003	0.0102044	0.0102044
Rab3	2.36e-05	0.0001388	-0.445442	0.105364	5.71611	0.0843912	0.00282964	0.0304752	0.0256859	0.0304752
mon2	2.36e-05	0.00013883	0.320956	0.0759215	7.74679	0.0438146	0.000388572	0.0169036	0.0105589	0.0169036
CG43340	2.38e-05	0.000139762	0.250104	0.0591868	8.39365	0.0217101	0.000288068	0.00482741	0.0102212	0.0102212
Not3	2.38e-05	0.000139762	0.356966	0.0844753	8.91903	0.0542143	0.000138867	0.0212693	0.0107389	0.0212693
CG4049	2.38e-05	0.000139762	0.497907	0.11783	7.67556	0.105477	0.000472964	0.0411789	0.0106569	0.0411789
Csl4	2.39e-05	0.000139947	-0.32339	0.0765382	7.17429	0.0444988	0.000940431	0.0166338	0.0121438	0.0166338
cmpy	2.39e-05	0.0001401	-0.576842	0.136543	4.26486	0.111998	0.0131732	0.0102004	0.0427586	0.0427586
yrt	2.39e-05	0.0001401	0.297919	0.0705186	8.40631	0.0377685	0.000243825	0.0146748	0.0102254	0.0146748
Eip63F-1	2.39e-05	0.0001401	-0.337896	0.0799813	6.52727	0.0478714	0.00201128	0.0163951	0.0171797	0.0171797
unc-13	2.42e-05	0.00014164	0.335876	0.0795527	8.76557	0.0480269	0.000162364	0.0188235	0.0105119	0.0188235
CG9458	2.43e-05	0.000142387	-0.644869	0.152785	5.7467	0.177079	0.00358605	0.066444	0.0253484	0.066444
maf-S	2.44e-05	0.000142598	-0.472904	0.112054	7.4631	0.0952363	0.000605571	0.037063	0.0111368	0.037063
Mal-A3	2.48e-05	0.000144829	2.13429	0.506152	4.80189	1.94102	0.0152984	0.753272	0.0364139	0.753272
Bub1	2.52e-05	0.000147162	0.260135	0.0617463	7.8967	0.0288536	0.000408559	0.0110293	0.0104143	0.0110293
NK7.1	2.53e-05	0.000147395	-0.452025	0.107306	5.93547	0.0871285	0.00219821	0.0323453	0.0233315	0.0323453
Lcch3	2.54e-05	0.000147915	-0.635122	0.150804	4.74588	0.172036	0.0118674	0.0563577	0.037056	0.0563577
Eip93F	2.55e-05	0.000148561	-0.444112	0.105477	8.0768	0.0841337	0.000436769	0.0329397	0.010274	0.0329397
PTP-ER	2.55e-05	0.000148793	0.372711	0.0885294	8.07439	0.0592604	0.000328282	0.0231841	0.0102757	0.0231841
Past1	2.56e-05	0.000149362	0.248036	0.0589292	8.43915	0.0231615	0.000179665	0.00684149	0.0102383	0.0102383
CG42518	2.59e-05	0.000150657	-0.351494	0.0835517	7.19884	0.0527337	0.00146919	0.0194735	0.0120415	0.0194735
CG10336	2.59e-05	0.000150657	-0.252537	0.0600296	7.89983	0.0254299	0.000398826	0.00844167	0.0104118	0.0104118
btd	2.59e-05	0.000150837	-0.742321	0.176471	3.42902	0.189639	0.0346761	0.0086146	0.0587496	0.0587496
CG43202	2.6e-05	0.000150898	1.21527	0.288917	2.79924	0.630438	0.0807639	0.169656	0.0811199	0.169656
KrT95D	2.61e-05	0.000151428	-0.250391	0.0595409	8.6643	0.0216524	0.000236983	0.00477194	0.0103984	0.0103984
lmgA	2.61e-05	0.000151475	0.622583	0.148051	7.77321	0.165491	0.00342558	0.0623319	0.0105285	0.0623319
Bsg25D	2.62e-05	0.000151806	0.315696	0.0750839	8.49597	0.0425564	0.000259172	0.0166536	0.0102673	0.0166536
PGAP1	2.63e-05	0.00015239	0.481784	0.114612	7.5076	0.0991296	0.000614515	0.0387934	0.0110151	0.0387934
vap	2.63e-05	0.000152481	0.249059	0.0592525	8.12204	0.0222732	0.000286524	0.00560484	0.0102461	0.0102461
edl	2.68e-05	0.000155467	-0.520966	0.124074	5.60733	0.116004	0.00368003	0.0425028	0.0269069	0.0425028
CG4998	2.71e-05	0.000156824	1.28991	0.307359	4.3777	0.71143	0.0416625	0.241747	0.0413414	0.241747
CG6055	2.73e-05	0.00015808	-0.549305	0.130948	4.57466	0.129057	0.0108443	0.0405976	0.0390152	0.0405976
CG31038	2.77e-05	0.000160057	-0.377342	0.0900168	7.24263	0.060932	0.000994834	0.0233142	0.0118674	0.0233142
CG1146	2.78e-05	0.000160733	-0.256745	0.0612633	7.61597	0.0220079	0.000498429	0.00393489	0.0107611	0.0107611
[truncated: 14,912 more rows]
